1 **Deep transcriptome annotation suggests that small and large proteins encoded in**  
2 **the same genes often cooperate**

3

4 Sondos Samandi<sup>1,7</sup> †, Annie V. Roy<sup>1,7</sup> †, Vivian Delcourt<sup>1,7,8</sup>, Jean-François Lucier<sup>2</sup>,  
5 Jules Gagnon<sup>2</sup>, Maxime C. Beaudoin<sup>1,7</sup>, Benoît Vanderperre<sup>1</sup>, Marc-André Breton<sup>1</sup>, Julie  
6 Motard<sup>1,7</sup>, Jean-François Jacques<sup>1,7</sup>, Mylène Brunelle<sup>1,7</sup>, Isabelle Gagnon-Arsenault<sup>6,7</sup>,  
7 Isabelle Fournier<sup>8</sup>, Aida Ouangraoua<sup>3</sup>, Darel J. Hunting<sup>4</sup>, Alan A. Cohen<sup>5</sup>, Christian R.  
8 Landry<sup>6,7</sup>, Michelle S. Scott<sup>1</sup>, Xavier Roucou<sup>1,7\*</sup>

9

10 <sup>1</sup>Department of Biochemistry, <sup>2</sup>Department of Biology and Center for Computational  
11 Science, <sup>3</sup>Department of Computer Science, <sup>4</sup>Department of Nuclear Medicine &  
12 Radiobiology, <sup>5</sup>Department of Family Medicine, Université de Sherbrooke, Québec,  
13 Canada; <sup>6</sup>Département de biologie and IBIS, Université Laval, Québec, Canada;  
14 <sup>7</sup>PROTEO, Québec Network for Research on Protein Function, Structure, and  
15 Engineering, Québec, Canada; <sup>8</sup>Université Lille, INSERM U1192, Laboratoire  
16 Protéomique, Réponse Inflammatoire & Spectrométrie de Masse (PRISM) F-59000 Lille,  
17 France

18

19 †These authors contributed equally to this work

20 \*Correspondance to Xavier Roucou: Département de biochimie (Z8-2001), Faculté de  
21 Médecine et des Sciences de la Santé, Université de Sherbrooke, 3201 Jean Mignault,  
22 Sherbrooke, Québec J1E 4K8, Canada, Tel. (819) 821-8000x72240; Fax. (819) 820 6831;

23 E-Mail: [xavier.roucou@usherbrooke.ca](mailto:xavier.roucou@usherbrooke.ca)

24

25 **Abstract**

26

27 Recent studies in eukaryotes have demonstrated the translation of alternative open  
28 reading frames (altORFs) in addition to annotated protein coding sequences (CDSs). We  
29 show that a large number of small proteins could in fact be coded by altORFs. The  
30 putative alternative proteins translated from altORFs have orthologs in many species and  
31 evolutionary patterns indicate that altORFs are particularly constrained in CDSs that  
32 evolve slowly. Thousands of predicted alternative proteins are detected in proteomic  
33 datasets by reanalysis using a database containing predicted alternative proteins. Protein  
34 domains and co-conservation analyses suggest a potential functional relationship between  
35 small and large proteins encoded in the same genes. This is illustrated with specific  
36 examples, including altMiD51, a 70 amino acid mitochondrial fission-promoting protein  
37 encoded in *MiD51/Mief1/SMCR7L*, a gene encoding an annotated protein promoting  
38 mitochondrial fission. Our results suggest that many coding genes code for more than one  
39 protein that are often functionally related.

40

41

## 42 **Introduction**

43 Current protein databases are cornerstones of modern biology but are based on a number  
44 of assumptions. In particular, a mature mRNA is predicted to contain a single CDS; yet,  
45 ribosomes can select more than one translation initiation site (TIS)<sup>1-3</sup> on any single  
46 mRNA. Also, minimum size limits are imposed on the length of CDSs, resulting in many  
47 RNAs being mistakenly classified as non-coding (ncRNAs)<sup>4-11</sup>. As a result of these  
48 assumptions, the size and complexity of most eukaryotic proteomes have probably been  
49 greatly underestimated<sup>12-15</sup>. In particular, few small proteins (defined as of 100 amino  
50 acids or less) are annotated in current databases. The absence of annotation of small  
51 proteins is a major bottleneck in the study of their function and their roles in health and  
52 disease. This is further supported by classical and recent examples of small proteins of  
53 functional importance, for instance many critical regulatory molecules such as the F0  
54 subunit of the FOF1-ATP synthase<sup>16</sup>, the sarcoplasmic reticulum calcium ATPase  
55 regulator phospholamban<sup>17</sup>, and the key regulator of iron homeostasis hepcidin<sup>18</sup>. This  
56 limitation also impedes our understanding of the process of origin of new genes, which  
57 are thought to contribute to evolutionary innovations. Because these genes generally code  
58 for small proteins<sup>19-22</sup>, they are difficult to unambiguously detect by proteomics and in  
59 fact are impossible to detect if they are not included in proteomics databases.

60

61 Functional annotation of ORFs encoding small proteins is particularly challenging since  
62 an unknown fraction of small ORFs may occur by chance in the transcriptome,  
63 generating a significant level of noise<sup>13</sup>. However, given that many small proteins have

64 important functions and are ultimately one of the most important sources of functional  
65 novelty, it is time to address the challenge of their functional annotations<sup>13</sup>.

66

67 We systematically reanalyzed several eukaryotic transcriptomes to annotate previously  
68 unannotated ORFs which we term alternative ORFs (altORFs), and we annotated the  
69 corresponding hidden proteome. Here, altORFs are defined as potential protein-coding  
70 ORFs in ncRNAs, in UTRs or in different reading frames from annotated CDSs in  
71 mRNAs (Figure 1a). For clarity, predicted proteins translated from altORFs are termed  
72 alternative proteins and proteins translated from annotated CDSs are termed reference  
73 proteins.

74

75 Our goal was to provide functional annotations of alternative proteins by (1) analyzing  
76 relative patterns of evolutionary conservation between alternative and reference proteins  
77 and their corresponding coding sequences; (2) estimating the prevalence of alternative  
78 proteins both by bioinformatics analysis and by detection in large experimental datasets;  
79 (3) detecting functional signatures in alternative proteins; and (4) predicting and testing  
80 functional cooperation between alternative and reference proteins.

81

## 82 **Results**

83 **Prediction of altORFs and alternative proteins.** We predicted a total of 539,134  
84 altORFs compared to 68,264 annotated CDSs in the human transcriptome (Figure 1b,  
85 Table 1). Because identical ORFs can be present in different RNA isoforms transcribed  
86 from the same genomic locus, the number of unique altORFs and CDSs becomes 183,191

87 and 54,498, respectively. AltORFs were also predicted in other organisms for comparison  
88 (Table 1). By convention, only reference proteins are annotated in current protein  
89 databases. As expected, altORFs are on average small, with a size ranging from 30 to  
90 1480 codons. Accordingly, the median size of predicted human alternative proteins is 45  
91 amino acids compared to 460 for reference proteins (Figure 1c), and 92.96 % of  
92 alternative proteins have less than 100 amino acids. Thus, the bulk of the translation  
93 products of altORFs would be small proteins. The majority of altORFs either overlap  
94 annotated CDSs in a different reading frame (35.98%) or are located in 3'UTRs (40.09%)  
95 (Figure 1d). 9.83% of altORFs are located in repeat sequences (Figure 1-figure  
96 supplement 1a), compared to 2.45% of CDSs. To assess whether observed altORFs could  
97 be attributable solely to random occurrence, due for instance to the base composition of  
98 the transcriptome, we estimated the expected number of altORFs generated in 100  
99 shuffled human transcriptomes. Overall, we observed 62,307 more altORFs than would  
100 be expected from random occurrence alone (Figure 1e;  $p < 0.0001$ ). This analysis suggests  
101 that a large number are expected by chance alone but that at the same time, a large  
102 absolute number could potentially be maintained and be functional. The density of  
103 altORFs observed in the CDSs, 3'UTRs and ncRNAs (Figure 1f) was markedly higher  
104 than in the shuffled transcriptomes, suggesting that these are maintained at frequencies  
105 higher than expected by chance, again potentially due to their coding function. In  
106 contrast, the density of altORFs observed in 5'UTRs was much lower than in the shuffled  
107 transcriptomes, supporting recent claims that negative selection eliminates AUGs (and  
108 thus the potential for the evolution of altORFs) in these regions<sup>23,24</sup>.  
109

110 Although the majority of human annotated CDSs do not have a TIS with a Kozak motif  
111 (Figure 1g)<sup>25</sup>, there is a correlation between a Kozak motif and translation efficiency<sup>26</sup>.  
112 We find that 27,539 (15% of 183,191) human altORFs encoding predicted alternative  
113 proteins have a Kozak motif (A/GNNAUGG), as compared to 19,745 (36% of 54,498)  
114 for annotated CDSs encoding reference proteins (Figure 1g). The number of altORFs  
115 with Kozak motifs is significantly higher in the human transcriptome compared to  
116 shuffled transcriptomes (Figure 1-figure supplement 2), again supporting their potential  
117 role as protein coding.

118

119 **Conservation analyses.** Next, we compared evolutionary conservation patterns of  
120 altORFs and CDSs. A large number of human alternative proteins have homologs in other  
121 species. In mammals, the number of homologous alternative proteins is higher than the  
122 number of homologous reference proteins (Figure 2a), and 9 are even conserved from  
123 human to yeast (Figure 2b), supporting a potential functional role. As phylogenetic  
124 distance from human increases, the number and percentage of genes encoding  
125 homologous alternative proteins decreases more rapidly than the percentage of genes  
126 encoding reference proteins (Figures 2a and c). This observation indicates either that  
127 altORFs evolve more rapidly than CDSs or that distant homologies are less likely to be  
128 detected given the smaller sizes of alternative proteins. Another possibility is that they  
129 evolve following the patterns of evolution of genes that evolve *de novo*, with a rapid birth  
130 and death rate, which accelerates their turnover over time<sup>20</sup>.

131 Since the same gene may contain a conserved CDS and one or several conserved  
132 altORFs, we analyzed the co-conservation of orthologous altORF-CDS pairs. Our results

133 show a very large fraction of co-conserved alternative-reference protein pairs in several species  
134 (Figure 3). Detailed results for all species are presented in Table 2.  
135  
136 If altORFs play a functional role, they would be expected to be under purifying selection.  
137 The first and second positions of a codon experience stronger purifying selection than the  
138 third because of redundancy in the genetic code<sup>27</sup>. In the case of CDS regions  
139 overlapping altORFs with a shifted reading frame, the third codon positions of the CDSs  
140 are either the first or the second in the altORFs, and should thus also undergo purifying  
141 selection. We analyzed conservation of third codon positions of CDSs for 100 vertebrate  
142 species for 1,088 altORFs completely nested within and co-conserved across vertebrates  
143 (human to zebrafish) with their 889 CDSs from 867 genes (Figure 4). We observed that  
144 in regions of the CDS overlapping altORFs, third codon positions were evolving at  
145 significantly more extreme speeds (slow or quick) than third codon positions of random  
146 control sequences from the entire CDS (Figure 4), reaching up to 67-fold for conservation  
147 at  $p < 0.0001$  and 124-fold for accelerated evolution at  $p < 0.0001$ . We repeated this  
148 analysis with the 53,862 altORFs completely nested within the 20,814 CDSs from 14,677  
149 genes, independently of their co-co-conservation. We observed a similar trend, with a 22-  
150 fold for conservation at  $p < 0.0001$ , and a 24-fold for accelerated evolution at  $p < 0.0001$   
151 (Figure 4-figure supplement 1). This is illustrated with three altORFs located within the  
152 CDS of *NTNG1*, *RET* and *VTHIA* genes (Figure 5). These three genes encode a protein  
153 promoting neurite outgrowth, the proto-oncogene tyrosine-protein kinase receptor Ret  
154 and a protein mediating vesicle transport to the cell surface, respectively. Two of these  
155 alternative proteins have been detected by ribosome profiling (*RET*, IP\_182668.1) or  
156 mass spectrometry (*VTHIA*, IP\_188229.1) (see below, Supplementary files 1 and 2).

157

158 **Evidence of expression of alternative proteins.** We provide two lines of evidence  
159 indicating that thousands of altORFs are translated into proteins. First, we re-analyzed  
160 detected TISs in publicly available ribosome profiling data<sup>28,29</sup>, and found 26,531 TISs  
161 mapping to annotated CDSs and 12,616 mapping to altORFs in these studies (Figure 6a;  
162 Supplementary file 1). Only a small fraction of TISs detected by ribosomal profiling  
163 mapped to altORFs<sup>3'</sup> even if those are more abundant than altORF<sup>5'</sup> relative to shuffled  
164 transcriptomes, likely reflecting a recently-resolved technical issue which prevented TIS  
165 detection in 3'UTRs<sup>30</sup>. New methods to analyze ribosome profiling data are being  
166 developed and will likely uncover more translated altORFs<sup>9</sup>. In agreement with the  
167 presence of functional altORFs<sup>3'</sup>, cap-independent translational sequences were recently  
168 discovered in human 3'UTRs<sup>31</sup>. Second, we re-analyzed proteomic data using our  
169 composite database containing alternative proteins in addition to annotated reference  
170 proteins (Figure 6b; Supplementary file 2). We selected four studies representing  
171 different experimental paradigms and proteomic applications: large-scale<sup>32</sup> and targeted  
172<sup>33</sup> protein/protein interactions, post-translational modifications<sup>34</sup>, and a combination of  
173 bottom-up, shotgun and interactome proteomics<sup>35</sup>. In the first dataset, we detected 3,957  
174 predicted alternative proteins in the interactome of reference proteins<sup>32</sup>, providing a  
175 framework to uncover the function of these proteins. In a second proteomic dataset  
176 containing about 10,000 reference human proteins<sup>35</sup>, a total of 549 predicted alternative  
177 proteins were detected. Using a phosphoproteomic large data set<sup>34</sup>, we detected 384  
178 alternative proteins. The biological function of these proteins is supported by the  
179 observation that some alternative proteins are specifically phosphorylated in cells



180 stimulated by the epidermal growth factor, and others are specifically phosphorylated  
181 during mitosis (Figure 7; Supplementary file 3). We provide examples of spectra  
182 validation (Figure 7-figure supplement 1). A fourth proteomic dataset contained 77  
183 alternative proteins in the epidermal growth factor receptor interactome<sup>33</sup> (Figure 6b). A  
184 total of 4,872 different alternative proteins were detected in these proteomic data. The  
185 majority of these proteins are coded by altORF<sup>CDS</sup>, but there are also significant  
186 contributions of altORF<sup>3'</sup>, altORF<sup>nc</sup> and altORF<sup>5'</sup> (Figure 6c). Overall, by mining the  
187 proteomic and ribosomal profiling data, we detected the translation of a total of 17,371  
188 unique alternative proteins. 467 of these alternative proteins were detected by both MS  
189 and ribosome profiling (Figure 8), providing a high-confidence collection of small  
190 alternative proteins for further studies.

191

192 **Functional annotations of alternative proteins.** An important goal of this study is to  
193 associate potential functions to alternative proteins, which we can do through  
194 annotations. Because the sequence similarities and the presence of particular signatures  
195 (families, domains, motifs, sites) are a good indicator of a protein's function, we analyzed  
196 the sequence of the predicted alternative proteins in several organisms with InterProScan,  
197 an analysis and classification tool for characterizing unknown protein sequences by  
198 predicting the presence of combined protein signatures from most main domain  
199 databases<sup>36</sup> (Figure 9; Figure 9-figure supplement 1). We found 41,511 (23%) human  
200 alternative proteins with at least one InterPro signature (Figure 9b). Of these, 37,739 (or  
201 20.6%) are classified as small proteins. Interestingly, the reference proteome has a  
202 smaller proportion (840 or 1.68%) of small proteins with at least one InterPro signature,

203 supporting a biological activity for alternative proteins.

204 Similar to reference proteins, signatures linked to membrane proteins are abundant in the

205 alternative proteome and represent more than 15,000 proteins (Figures 9c-e; Figure 9-

206 figure supplement 1). With respect to the targeting of proteins to the secretory pathway or

207 to cellular membranes, the main difference between the alternative and the reference

208 proteomes lies in the very low number of proteins with both signal peptides and

209 transmembrane domains. Most of the alternative proteins with a signal peptide do not

210 have a transmembrane segment and are predicted to be secreted (Figures 9c, d),

211 supporting the presence of large numbers of alternative proteins in plasma<sup>37</sup>. The majority

212 of predicted alternative proteins with transmembrane domains have a single membrane

213 spanning domain but some display up to 27 transmembrane regions, which is still within

214 the range of reference proteins that show a maximum of 33 (Figure 9e).

215 We extended the functional annotation using the Gene Ontology. A total of 585

216 alternative proteins were assigned 419 different InterPro entries, and 343 of them were

217 tentatively assigned 192 gene ontology terms (Figure 10). 15.5% (91/585) of alternative

218 proteins with an InterPro entry were detected by MS or/and ribosome profiling, compared

219 to 13.7% (22,055/161,110) for alternative proteins without an InterPro entry ( $p$ -value =

220  $1.13e-05$ , Fisher's exact test and chi-square test). Thus, predicted alternative proteins with

221 InterPro entries are more likely to be detected, supporting their functional role. The most

222 abundant class of predicted alternative proteins with at least one InterPro entry are C2H2

223 zinc finger proteins with 110 alternative proteins containing 187 C2H2-type/integrase

224 DNA-binding domains, 91 C2H2 domains and 23 C2H2-like domains (Figure 11a).

225 Eighteen of these (17.8%) were detected in public proteomic and ribosome profiling

226 datasets, a percentage that is similar to reference zinc finger proteins (20.1%) (Figure 6,  
227 Table 3). Alternative proteins have between 1 and 23 zinc finger domains (Figure 11b).  
228 Zinc fingers mediate protein-DNA, protein-RNA and protein-protein interactions<sup>38</sup>. The  
229 linker sequence separating adjacent finger motifs matches or resembles the consensus  
230 TGEK sequence in nearly half the annotated zinc finger proteins<sup>39</sup>. This linker confers  
231 high affinity DNA binding and switches from a flexible to a rigid conformation to  
232 stabilize DNA binding. The consensus TGEK linker is present 46 times in 31 alternative  
233 zinc finger proteins (Supplementary file 4). These analyses show that a number of  
234 alternative proteins can be classified into families and will help deciphering their  
235 functions.

236

### 237 **Evidence of functional relationships between reference and alternative proteins**

238 **coded by the same genes.** Since one gene may code for both a reference and one or  
239 several alternative proteins, we asked whether paired (encoded in the same gene)  
240 alternative and reference proteins have functional relationships. The functional  
241 associations discussed here are potential functional interactions that do not necessarily  
242 imply physical interactions; however, there are a few known examples of functional  
243 linkage between different proteins encoded in the same gene (Table 4). If there is a  
244 functional relationship, one would expect orthologous alternative- reference protein pairs  
245 to be co-conserved more often than expected by chance<sup>40</sup>. Our results show a large  
246 fraction of co-conserved alternative-reference protein pairs in several species (Figure 3).  
247 Detailed results for all species are presented in Table 2.  
248 Another mechanism that could show functional relationships between alternative and

249 reference proteins encoded in the same gene would be that they share protein domains.  
250 We compared the functional annotations of the 585 alternative proteins with an InterPro  
251 entry with the reference proteins expressed from the same genes. Strikingly, 89 of 110  
252 altORFs coding for zinc finger proteins (Figure 11) are present in transcripts in which the  
253 CDS also codes for a zinc finger protein. Overall, 138 alternative/reference protein pairs  
254 share at least one InterPro entry and many pairs share more than one entry (Figure 12a).  
255 The number of shared entries was much higher than expected by chance (Figure 12b,  
256  $p < 0.0001$ ). The correspondence between InterPro domains of alternative proteins and  
257 their corresponding reference proteins coded by the same genes also indicates that even  
258 when entries are not identical, the InterPro terms are functionally related (Figure 12c;  
259 Figure 12-figure supplement 1), overall supporting a potential functional linkage between  
260 reference and predicted alternative proteins. Domain sharing remains significant  
261 ( $p < 0.001$ ) even when the most frequent domains, zinc fingers, are not considered (Figure  
262 12-figure supplement 2).  
263  
264 Recently, the interactome of 118 human zinc finger proteins was determined by affinity  
265 purification followed by mass spectrometry<sup>41</sup>. This study provides a unique opportunity  
266 to test if, in addition to possessing zinc finger domains, thus being functionally connected  
267 some pairs of reference and alternative proteins coded by the same gene also interact. We  
268 re-analyzed the MS data using our alternative protein sequence database to detect  
269 alternative proteins in this interactome (Supplementary file 5). Five alternative proteins  
270 (IP\_168460.1, IP\_168527.1, IP\_270697.1, IP\_273983.1, IP\_279784.1) were identified  
271 within the interactome of their reference zinc finger proteins. This number was higher

272 than expected by chance ( $p < 10^{-6}$ ) based on 1 million binomial simulations of randomized  
273 interactomes. This result strongly supports the hypothesis of functional relationships  
274 between alternative and reference proteins coded by the same genes, and indicates that  
275 there are examples of physical interactions.

276

277 Finally, we integrated the co-conservation and expression analyses to produce a high-  
278 confidence list of alternative proteins predicted to have a functional relationship with  
279 their reference proteins and found 2,715 alternative proteins in mammals (*H. sapiens* to  
280 *B. taurus*), and 44 in vertebrates (*H. sapiens* to *D. rerio*) (Supplementary file 6). In order  
281 to further test for functional relationship between alternative/reference protein pairs in  
282 this list, we focused on alternative proteins detected with at least two peptide spectrum  
283 matches or with high TIS reads. From this subset, we selected altMiD51 (IP\_294711.1)  
284 among the top 2% of alternative proteins detected with the highest number of unique  
285 peptides in proteomics studies, and altDDIT3 (IP\_211724.1) among the top 2% of  
286 altORFs with the most cumulative reads in translation initiation ribosome profiling  
287 studies.

288 AltMiD51 is a 70 amino acid alternative protein conserved in vertebrates<sup>42</sup> and co-  
289 conserved with its reference protein MiD51 from humans to zebrafish (Supplementary  
290 file 6). Its coding sequence is present in exon 2 of the *MiD51/MIEF1/SMCR7L* gene. This  
291 exon forms part of the 5'UTR for the canonical mRNA and is annotated as non-coding in  
292 current gene databases (Figure 13a). Yet, altMiD51 is robustly detected by MS in several  
293 cell lines (Supplementary file 2: HEK293, HeLa Kyoto, HeLa S3, THP1 cells and gut  
294 tissue), and we validated some spectra using synthetic peptides (Figure 13-figure

295 supplement 1), and it is also detected by ribosome profiling (Supplementary file 1)<sup>37,42,43</sup>.

296 We confirmed co-expression of altMiD51 and MiD51 from the same transcript (Figure

297 13b). Importantly, the tripeptide LYR motif predicted with InterProScan and located in

298 the N-terminal domain of altMiD51 (Figure 13a) is a signature of mitochondrial proteins

299 localized in the mitochondrial matrix<sup>44</sup>. Since *MiD51/MIEF1/SMCR7L* encodes the

300 mitochondrial protein MiD51, which promotes mitochondrial fission by recruiting

301 cytosolic Drp1, a member of the dynamin family of large GTPases, to mitochondria<sup>45</sup>, we

302 tested for a possible functional connection between these two proteins expressed from the

303 same mRNA. We first confirmed that MiD51 induces mitochondrial fission (Figure 13-

304 figure supplement 2). Remarkably, we found that altMiD51 also localizes at the

305 mitochondria (Figure 13c; Figure 13-figure supplement 3) and that its overexpression

306 results in mitochondrial fission (Figure 13d). This activity is unlikely to be through

307 perturbation of oxidative phosphorylation since the overexpression of altMiD51 did not

308 change oxygen consumption nor ATP and reactive oxygen species production (Figure 13-

309 figure supplement 4). The decrease in spare respiratory capacity in altMiD51-expressing

310 cells (Figure 13-figure supplement 4a) likely resulted from mitochondrial fission<sup>46</sup>. The

311 LYR domain is essential for altMiD51-induced mitochondrial fission since a mutant of

312 the LYR domain, altMiD51(LYR→AAA) was unable to convert the mitochondrial

313 morphology from tubular to fragmented (Figure 13d). Drp1(K38A), a dominant negative

314 mutant of Drp1<sup>47</sup>, largely prevented the ability of altMiD51 to induce mitochondrial

315 fragmentation (Figure 13d; Figure 13-figure supplement 5a). In a control experiment, co-

316 expression of wild-type Drp1 and altMiD51 proteins resulted in mitochondrial

317 fragmentation (Figure 13-figure supplement 5b). Expression of the different constructs

318 used in these experiments was verified by western blot (Figure 13-figure supplement 6).  
319 Drp1 knockdown interfered with altMiD51-induced mitochondrial fragmentation (Figure  
320 14), confirming the proposition that Drp1 mediates altMiD51-induced mitochondrial  
321 fragmentation. It remains possible that altMiD51 promotes mitochondrial fission  
322 independently of Drp1 and is able to reverse the hyperfusion induced by Drp1  
323 inactivation. However, Drp1 is the key player mediating mitochondrial fission and most  
324 likely mediates altMiD51-induced mitochondrial fragmentation, as indicated by our  
325 results.

326 AltDDIT3 is a 31 amino acid alternative protein conserved in vertebrates and co-  
327 conserved with its reference protein DDIT3 from human to bovine (Supplementary file  
328 6). Its coding sequence overlaps the end of exon 1 and the beginning of exon 2 of the  
329 *DDIT3/CHOP/GADD153* gene. These exons form part of the 5'UTR for the canonical  
330 mRNA (Figure 15a). To determine the cellular localization of altDDIT3 and its possible  
331 relationship with DDIT3, confocal microscopy analyses were performed on HeLa cells  
332 co-transfected with altDDIT3<sup>GFP</sup> and DDIT3<sup>mCherry</sup>. Expression of these constructs was  
333 verified by western blot (Figure 15-figure supplement 1). Interestingly, both proteins  
334 were mainly localized in the nucleus and partially localized in the cytoplasm (Figure  
335 15b). This distribution for DDIT3 confirms previous studies<sup>48,49</sup>. Both proteins seemed to  
336 co-localize in these two compartments (Pearson correlation coefficient 0.92, Figure 15c).  
337 We further confirmed the statistical significance of this colocalization by applying  
338 Costes' automatic threshold and Costes' randomization colocalization analysis and  
339 Manders Correlation Coefficient (Figure 15d; Figure 15-figure supplement 2)<sup>50</sup>. Finally,  
340 in lysates from cells co-expressing altDDIT3<sup>GFP</sup> and DDIT3<sup>mCherry</sup>, DDIT3<sup>mCherry</sup> was

341 immunoprecipitated with GFP-trap agarose, confirming an interaction between the small  
342 altDDTI3 and the large DDIT3 proteins encoded in the same gene (Figure 15e).

343

344

## 345 **Discussion**

346 We have provided the first functional annotation of altORFs with a minimum size of 30  
347 codons in different genomes. The comprehensive annotation of *H sapiens* altORFs is  
348 freely available to download at <https://www.roucoulab.com/p/downloads> (Homo sapiens  
349 functional annotation of alternative proteins based on RefSeq GRCh38 (hg38)  
350 predictions). In light of the increasing evidence from approaches such as ribosome  
351 profiling and MS-based proteomics that the one mRNA-one canonical CDS assumption  
352 is strongly challenged, our findings provide the first clear functional insight into a new  
353 layer of regulation in genome function. While many observed altORFs may be  
354 evolutionary accidents with no functional role, several independent lines of evidence  
355 support translation and a functional role for thousands of alternative proteins: (1)  
356 overrepresentation of altORFs relative to shuffled sequences; (2) overrepresentation of  
357 altORF Kozak sequences; (3) active altORF translation detected via ribosomal profiling;  
358 (4) detection of thousands of alternative proteins in multiple existing proteomic datasets;  
359 (5) correlated altORF-CDS conservation, but with overrepresentation of highly conserved  
360 and fast-evolving altORFs; (6) overrepresentation of identical InterPro signatures  
361 between alternative and reference proteins encoded in the same mRNAs; (7) several  
362 thousand co-conserved paired alternative-reference proteins encoded in the same gene;  
363 and (8) presence of clear, striking examples in altMiD51, altDDIT3 and 5 alternative



364 proteins interacting with their reference zinc finger proteins. While 5 of these 8 lines of  
365 evidence support an unspecified functional altORF role, 4 of them (5, 6, 7 and 8)  
366 independently support a specific functional/evolutionary interpretation of their role: that  
367 alternative proteins and reference proteins have paired functions. Note that this  
368 hypothesis does not require binding, just functional cooperation such as activity on a  
369 shared pathway.

370

371 The presence of different coding sequences in the same gene provides a coordinated  
372 transcriptional regulation. Consequently, the transcription of different coding sequences  
373 can be turned on or off together, similar to prokaryotic operons. Thus, the observation  
374 that alternative-reference protein pairs encoded in the same genes have functional  
375 relationships is not completely unexpected. This observation is also in agreement with  
376 increasing evidence that small proteins regulate the function of larger proteins<sup>51</sup>. We  
377 speculate that clustering of a CDS and one or more altORFs in the same genes, and thus  
378 in the same transcription unit allows cells to adapt more quickly with optimized energy  
379 expenditure to environmental changes.

380

381 Upstream ORFs here labeled altORFs<sup>5'</sup> are important translational regulators of canonical  
382 CDSs in vertebrates<sup>52</sup>. Interestingly, the altORF<sup>5'</sup> encoding altDDIT3 was characterized  
383 as an inhibitory upstream ORF<sup>53,54</sup>, but evidence of endogenous expression of the  
384 corresponding small protein was not sought. The detection of altMiD51 and altDDIT3  
385 suggests that a fraction of altORFs<sup>5'</sup> may have dual functions as translation regulators and  
386 functional proteins.

387

388 Our results raise the question of the evolutionary origins of these altORFs. A first  
389 possible mechanism involves the polymorphism of initiation and stop codons during  
390 evolution<sup>55,56</sup>. For instance, the generation of an early stop codon in the 5'end of a CDS  
391 could be followed by the evolution of another translation initiation site downstream,  
392 creating a new independent ORF in the 3'UTR of the canonical gene. This mechanism of  
393 altORF origin, reminiscent of gene fission, would at the same time produce a new altORF  
394 that shares protein domains with the annotated CDS, as we observed for a substantial  
395 fraction (24%) of the 585 alternative proteins with an InterPro entry. A second  
396 mechanism would be de novo origin of ORFs, which would follow the well-established  
397 models of gene evolution *de novo*<sup>20,57,58</sup> in which new ORFs are transcribed and  
398 translated and have new functions or await the evolution of new functions by mutations.  
399 The numerous altORFs with no detectable protein domains may have originated this way  
400 from previously non-coding regions or in regions that completely overlap with CDS in  
401 other reading frames.

402

403 Detection is an important challenge in the study of small proteins. A TIS detected by  
404 ribosome profiling does not necessarily imply that the protein is expressed as a stable  
405 molecule, and proteomic analyses more readily detect large proteins that generate several  
406 peptides after enzymatic digestion. In addition, evolutionarily novel genes tend to be  
407 poorly expressed, again reducing the probability of detection<sup>20</sup>. Here, we used a  
408 combination of five search engines, thus increasing the confidence and sensitivity of hits  
409 compared to single-search-engine processing<sup>59,60</sup>. This strategy led to the detection of

410 several thousand alternative proteins. However, ribosome profiling and MS have  
411 technical caveats and the comprehensive contribution of small proteins to the proteome  
412 will require more efforts, including the development of new tools such as specific  
413 antibodies.

414

415 Only a relatively small percentage of alternative proteins (22.6%) are functionally  
416 annotated with Interpro signatures, compared to reference proteins (96.9%). An obvious  
417 explanation is the small size of alternative proteins with a median size of 45 amino acids,  
418 which may not be able to accommodate large domains. It has been proposed that small  
419 proteins may be precursors of new proteins but require an elongation of their coding  
420 sequence before they display a useful cellular activity<sup>19,51</sup>. According to this hypothesis,  
421 it is possible that protein domains appear only after elongation of the coding sequence.  
422 Alternatively, InterPro domains were identified by investigating the reference proteome,  
423 and alternative proteins may have new domains and motifs that remain to be  
424 characterized. Finally, an unknown fraction of predicted altORFs may not be translated or  
425 may code for non-functional peptides.

426

427 In conclusion, our deep annotation of the transcriptome reveals that a large number of  
428 small eukaryotic proteins, which may even represent the majority, are still officially  
429 unannotated. Our results also suggest that many small and large proteins coded by the  
430 same mRNA may cooperate by regulating each other's function or by functioning in the  
431 same pathway, confirming the few examples in the literature of unrelated proteins  
432 encoded in the same genes and functionally cooperating<sup>61-65</sup>. To determine whether or not

433 this functional cooperation is a general feature of small/large protein pairs encoded in the  
434 same gene will require much more experimental evidence, but our results strongly  
435 support this hypothesis.

436

## 437 **Materials and methods**

### 438 **Generation of alternative open reading frames (altORFs) and alternative protein**

439 **databases.** Throughout this manuscript, annotated protein coding sequences and proteins  
440 in current databases are labelled annotated coding sequences or CDSs and reference  
441 proteins, respectively. For simplicity reasons, predicted alternative protein coding  
442 sequences are labelled alternative open reading frames or altORFs.

443 To generate MySQL databases containing the sequences of all predicted alternative  
444 proteins translated from reference annotation of different organisms, a computational  
445 pipeline of Perl scripts was developed as previously described with some modifications<sup>37</sup>.  
446 Genome annotations for *H. sapiens* (release hg38, Assembly: GCF\_000001405.26), *P.*  
447 *troglydytes* (Pan\_troglydytes-2.1.4, Assembly: GCF\_000001515.6), *M. musculus*  
448 (GRCm38.p2, Assembly: GCF\_000001635.22), *D. melanogaster* (release 6, Assembly:  
449 GCA\_000705575.1), *C. elegans* (WBcel235, Assembly: GCF\_000002985.6) and *S.*  
450 *cerevisiae* (Sc\_YJM993\_v1, Assembly: GCA\_000662435.1) were downloaded from the  
451 NCBI website (<http://www.ncbi.nlm.nih.gov/genome>). For *B. taurus* (release UMD  
452 3.1.86), *X. tropicalis* (release JGI\_4.2) and *D. rerio* (GRCz10.84), genome annotations  
453 were downloaded from Ensembl (<http://www.ensembl.org/info/data/ftp/>). Each annotated  
454 transcript was translated *in silico* with Transeq<sup>66</sup>. All ORFs starting with an AUG and  
455 ending with a stop codon different from the CDS, with a minimum length of 30 codons

456 (including the stop codon) and identified in a distinct reading frame compared to the  
457 annotated CDS when overlapping the CDS, were defined as altORFs.  
458 An additional quality control step was performed to remove initially predicted altORFs  
459 with a high level of identity with reference proteins. Such altORFs typically start in a  
460 different coding frame than the reference protein but through alternative splicing, end  
461 with the same amino acid sequence as their associated reference protein. Using BLAST,  
462 altORFs overlapping CDSs chromosomal coordinates and showing more than 80%  
463 identity and overlap with an annotated CDS were rejected.  
464 AltORF localization was assigned according to the position of the predicted translation  
465 initiation site (TIS): altORFs<sup>5'</sup>, altORFs<sup>CDS</sup> and altORFs<sup>3'</sup> are altORFs with TISs located  
466 in 5'UTRs, CDSs and 3'UTRs, respectively. Non-coding RNAs (ncRNAs) have no  
467 annotated CDS and all ORFs located within ncRNAs are labelled altORFs<sup>nc</sup>.  
468 The presence of the simplified Kozak sequence (A/GNNATGG) known to be favorable  
469 for efficient translation initiation was also assessed for each predicted altORF<sup>67</sup>.  
470  
471 **Identification of TISs.** The global aggregates of initiating ribosome profiles data were  
472 obtained from the initiating ribosome tracks in the GWIPS-viz genome browser<sup>28</sup> with  
473 ribosome profiling data collected from five large scale studies<sup>2,9,68-70</sup>. Sites were mapped  
474 to hg38 using a chain file from the UCSC genome browser  
475 (<http://hgdownload.soe.ucsc.edu/goldenPath/hg19/liftOver/hg19ToHg38.over.chain.gz>)  
476 and CrossMap v0.1.6 (RRID:SCR\_001173). Similar to the methods used in these studies,  
477 an altORF is considered as having an active TIS if it is associated with at least 10 reads at  
478 one of the 7 nucleotide positions of the sequence NNNAUGN (AUG is the predicted

479 altORF TIS). An additional recent study was also included in our analysis<sup>29</sup>. In this study,  
480 a threshold of 5 reads was used. Raw sequencing data for ribosome protected fragments  
481 in harringtonine treated cells was aligned to the human genome (GRCh38) using bowtie2  
482 (2.2.8)<sup>71</sup>. Similar to the method used in this work, altORFs with at least 5 reads  
483 overlapping one position in the kozak region were considered as having an  
484 experimentally validated TIS.

485

486 **Generation of shuffled transcriptomes.** Each annotated transcript was shuffled using  
487 the Fisher-Yates shuffle algorithm. In CDS regions, all codons were shuffled except the  
488 initiation and stop codons. For mRNAs, we shuffled the 5'UTRs, CDSs and 3'UTRs  
489 independently to control for base composition. Non-coding regions were shuffled at the  
490 nucleotide level. The resulting shuffled transcriptome has the following features  
491 compared to hg38: same number of transcripts, same transcripts lengths, same nucleotide  
492 composition, and same amino-acid composition for the proteins translated from the  
493 CDSs. Shuffling was repeated 100 times and the results are presented with average values  
494 and standard deviations. The total number of altORFs is 539,134 for hg38, and an  
495 average of 489,073 for shuffled hg38. AltORFs and kozak motifs in the 100 shuffled  
496 transcriptomes were detected as described above for hg38.

497

498 **Identification of paralogs/orthologs in alternative proteomes.** Both alternative and  
499 reference proteomes were investigated. Pairwise ortholog and paralog relationships  
500 between the human proteomes and the proteomes from other species, were calculated  
501 using an InParanoid-like approach<sup>72</sup>, as described below (RRID:SCR\_006801). The

502 following BLAST (RRID:SCR\_001010) procedure was used. Comparisons using our  
503 datasets of altORFs/CDS protein sequences in multiple FASTA formats from  
504 *Saccharomyces cerevisiae*, *Caenorhabditis elegans*, *Drosophila melanogaster*, *Danio*  
505 *rerio*, *Xenopus tropicalis* *Bos taurus*, *Mus musculus*, *Pan troglodytes*, *Homo sapiens* were  
506 performed between each pair of species (*Homo sapiens* against the other species),  
507 involving four whole proteome runs per species pair: pairwise comparisons (organism A  
508 vs organism B, organism B vs organism A), plus two self-self runs (organism A vs  
509 organism A, organism B vs organism B). BLAST homology inference was accepted when  
510 the length of the aligned region between the query and the match sequence equalled or  
511 exceeded 50% of the length of the sequence, and when the bitscore reached a minimum  
512 of 40<sup>73</sup>. Orthologs were detected by finding the mutually best scoring pairwise hits  
513 (reciprocal best hits) between datasets A-B and B-A. The self-self runs were used to  
514 identify paralogy relationships as described<sup>72</sup>.

515

516 **Co-conservation analyses.** For each orthologous alternative protein pair A-B between  
517 two species, we evaluated the presence and the orthology of their corresponding  
518 reference proteins A'-B' in the same species. In addition, the corresponding altORFs and  
519 CDSs had to be present in the same gene.

520 In order to develop a null model to assess co-conservation of alternative proteins and  
521 their reference pairs, we needed to establish a probability that any given orthologous  
522 alternative protein would by chance occur encoded on the same transcript as its paired,  
523 orthologous reference protein. Although altORFs might in theory shift among CDSs (and  
524 indeed, a few examples have been observed), transposition events are expected to be

525 relatively rare; we thus used the probability that the orthologous alternative protein is  
526 paired with any orthologous CDS for our null model. Because this probability is by  
527 definition higher than the probability that the altORF occurs on the paired CDS, it is a  
528 conservative estimate of co-conservation. We took two approaches to estimating this  
529 percentage, and then used whichever was higher for each species pair, yielding an even  
530 more conservative estimate. First, we assessed the percentage of orthologous reference  
531 proteins under the null supposition that each orthologous alternative protein had an equal  
532 probability of being paired with any reference protein, orthologous or not. Second, we  
533 assessed the percentage of non-orthologous alternative proteins that were paired with  
534 orthologous reference proteins. This would account for factors such as longer CDSs  
535 having a higher probability of being orthologous and having a larger number of paired  
536 altORFs. For example, between *Homo sapiens* and *Mus musculus*, we found that 22,304  
537 of 54,498 reference proteins (40.9%) were orthologs. Of the 157,261 non-orthologous  
538 alternative proteins, 106,987 (68%) were paired with an orthologous reference protein.  
539 Because 68% is greater than 40.9%, we used 68% as the probability for use in our null  
540 model. Subsequently, our model strongly indicates co-conservation (Fig. 3 and Table 2;  
541  $p < 10^{-6}$  based on 1 million binomial simulations; highest observed random percentage  
542 =69%, much lower than the observed 96% co-conservation).

543

544 **Analysis of third codon position (wobble) conservation.** Basewise conservation scores  
545 for the alignment of 100 vertebrate genomes including *H. sapiens* were obtained from  
546 UCSC genome browser  
547 (<http://hgdownload.soe.ucsc.edu/goldenPath/hg38/phyloP100way/>)



548 (RRID:SCR\_012479). Conservation PhyloP scores relative to each nucleotide position  
549 within codons were extracted using a custom Perl script and the Bio-BigFile module  
550 version 1.07 (see code file). The PhyloP conservation score for the wobble nucleotide of  
551 each codon within the CDS was extracted. For the 53,862 altORFs completely nested  
552 inside 20,814 CDSs, the average PhyloP score for wobble nucleotides within the altORF  
553 region was compared to the average score for the complete CDS. To generate controls,  
554 random regions in CDSs with a similar length distribution as altORFs were selected and  
555 PhyloP scores for wobble nucleotides were extracted. We compared the differences  
556 between altORF and CDS PhyloP scores (altORF PhyloP – CDS PhyloP) to those  
557 generated based on random regions. We identified expected quantiles of the differences  
558 (“DQ” column in the table), and compared these to the observed differences. Because  
559 there was greater conservation of wobble nucleotide PhyloP scores within altORFs  
560 regions located farther from the center of their respective genes ( $r = 0.08$ ,  $p < 0.0001$ ),  
561 observed differences were adjusted using an 8-knot cubic basis spline of percent distance  
562 from center. These observed differences were also adjusted for site-specific signals as  
563 detected in the controls.

564

### 565 **Human alternative protein classification and in silico functional annotation.**

566 *Repeat and transposable element annotation*

567 RepeatMasker, a popular software to scan DNA sequences for identifying and classifying  
568 repetitive elements (RRID:SCR\_012954), was used to investigate the extent of altORFs  
569 derived from transposable elements<sup>74</sup>. Version 3-3-0 was run with default settings.

570 *Alternative protein analysis using InterProScan* (RRID:SCR\_005829)

571 InterProScan combines 15 different databases, most of which use Hidden Markov models  
572 for signature identification<sup>75</sup>. Interpro merges the redundant predictions into a single  
573 entry and provides a common annotation. A recent local version of InterProScan 5.14-  
574 53.0 was run using default parameters to scan for known protein domains in alternative  
575 proteins. Gene ontology (GO) and pathway annotations were also reported if available  
576 with -goterm and -pa options. Only protein signatures with an E-value  $\leq 10^{-3}$  were  
577 considered.

578 We classified the reported InterPro hits as belonging to one or several of three clusters;  
579 (1) alternative proteins with InterPro entries; (2) alternative proteins with signal peptides  
580 (SP) and/or transmembrane domains (TM) predicted by at least two of the three SignalP,  
581 PHOBIUS, TMHMM tools and (3) alternative proteins with other signatures.

582 The GO terms assigned to alternative proteins with InterPro entries were grouped and  
583 categorised into 13 classes within the three ontologies (cellular component, biological  
584 process, molecular function) using the CateGORizer tool<sup>76</sup> (RRID:SCR\_005737).

585 Each unique alternative protein with InterPro entries and its corresponding reference  
586 protein (encoded in the same transcript) were retrieved from our InterProscan output.

587 Alternative and reference proteins without any InterPro entries were ignored. The overlap  
588 in InterPro entries between alternative and reference proteins was estimated as follows.

589 We went through the list of alternative/reference protein pairs and counted the overlap in  
590 the number of entries between the alternative and reference proteins as  
591  $100 \times \text{intersection} / \text{union}$ . All reference proteins and the corresponding alternative proteins  
592 were combined together in each comparison so that all domains of all isoforms for a  
593 given reference protein were considered in each comparison. The random distribution of

594 the number of alternative/reference protein pairs that share at least one InterPro entry was  
595 computed by shuffling the alternative/reference protein pairs and calculating how many  
596 share at least one InterPro entry. This procedure was repeated 1,000 times. Finally, we  
597 compared the number and identity of shared InterPro entries in a two dimensional matrix  
598 to illustrate which Interpro entries are shared. In many instances, including for zinc-finger  
599 coding genes, InterPro entries in alternative/reference protein pairs tend to be related  
600 when they are not identical.

601

602 **Mass Spectrometry identification.** Wrapper Perl scripts were developed for the use of  
603 SearchGUI v2.0.11<sup>77</sup> (RRID:SCR\_012054) and PeptideShaker v1.1.0<sup>59</sup>  
604 (RRID:SCR\_002520) on the *Université de Sherbrooke's* 39,168 core high-performance  
605 *Mammoth Parallèle 2* computing cluster  
606 (<http://www.calculquebec.ca/en/resources/compute-servers/mammoth-parallele-ii>).

607 SearchGUI was configured to run the following proteomics identification search engines:  
608 X!Tandem<sup>78</sup>, MS-GF+<sup>79</sup>, MyriMatch<sup>80</sup>, Comet<sup>81</sup>, and OMSSA<sup>82</sup>. SearchGUI parameters  
609 were set as follow: maximum precursor charge, 5; maximum number of PTM per peptide,  
610 5; X!Tandem minimal fragment m/z, 140; removal of initiator methionine for Comet, 1. A  
611 full list of parameters used for SearchGUI and PeptideShaker is available in  
612 Supplementary file 2, sheet 1. For PXD000953 dataset<sup>35</sup>, precursor and fragment  
613 tolerance were set 0.006 Da and 0.1 Da respectively, with carbamidomethylation of C as  
614 a fixed modification and Nter-Acetylation and methionine oxidation as variable  
615 modifications. For PXD000788<sup>33</sup> and PXD000612<sup>34</sup> datasets, precursor and fragment  
616 tolerance were set to 4.5 ppm and 0.1 Da respectively with carbamidomethylation of

617 cysteine as a fixed modification and Nter-Acetylation, methionine oxidation and  
618 phosphorylation of serine, threonine and tyrosine as variable modifications. For  
619 PXD002815 dataset<sup>32</sup>, precursor and fragment tolerance were set to 4.5 ppm and 0.1 Da  
620 respectively with carbamidomethylation of cysteine as a fixed modification and Nter-  
621 Acetylation and methionine oxidation as variable modifications. Datasets were searched  
622 using a target-decoy approach against a composite database composed of a target  
623 database [Uniprot canonical and isoform reference proteome (16 January 2015) for a total  
624 of 89,861 sequences + custom alternative proteome resulting from the in silico translation  
625 of all human altORFs (available to download at  
626 <https://www.roucoulab.com/p/downloads>)], and their reverse protein sequences from the  
627 target database used as decoys. In order to separate alternative and reference proteins for  
628 FDR analyses, PeptideShaker output files were extracted with target and decoy hits.  
629 PSMs matching reference target or decoy proteins were separated from those matching  
630 alternative targets or decoys as previously described<sup>83,84</sup>. PSMs that matched both  
631 reference and alternative proteins were automatically moved to the reference database  
632 group. PSMs were then ranked according to their PeptideShaker score and filtered at 1%  
633 FDR separately. Validated PSMs were selected to group proteins using proteoQC R tool  
634<sup>85</sup>, and proteins were separately filtered again using a 1% FDR cut-off.  
635 Only alternative proteins identified with at least one unique and specific peptide were  
636 considered valid<sup>59</sup>. Any peptide matching both a canonical (annotated in Uniprot) and an  
637 alternative protein was attributed to the canonical protein. For non-unique peptides, i.e.  
638 peptides matching more than one alternative protein, the different accession IDs are  
639 indicated in the MS files. For subsequent analyses (e.g. conservation, protein

640 signature...), only one protein is numbered in the total count of alternative proteins; we  
641 arbitrarily selected the alternative protein with the lowest accession ID.  
642 Peptides matching proteins in a protein sequence database for common contaminants  
643 were rejected<sup>86</sup>.  
644 For spectral validation (Figure 6-figure supplement 1, 2, 3, and 4), synthetic peptides were  
645 purchased from the peptide synthesis service at the *Université de Sherbrooke*. Peptides  
646 were solubilized in 10% acetonitrile, 1% formic acid and directly injected into a Q-  
647 Exactive mass spectrometer (Thermo Scientific) via an electro spray ionization source  
648 (Thermo Scientific). Spectra were acquired using Xcalibur 2.2 (RRID:SCR\_014593) at  
649 70000 resolution with an AGC target of 3e6 and HCD collision energy of 25. Peaks were  
650 assigned manually by comparing monoisotopic m/z theoretical fragments and  
651 experimental (PeptideShaker) spectra.

652 In order to test if the interaction between alternative zinc-finger/reference zinc-finger  
653 protein pairs (encoded in the same gene) may have occurred by chance only, all  
654 interactions between alternative proteins and reference proteins were randomized with an  
655 in-house randomisation script. The number of interactions with reference proteins for  
656 each altProt was kept identical as the number of observed interactions. The results  
657 indicate that interactions between alternative zinc-finger/reference zinc-finger protein  
658 pairs did not occur by chance ( $p < 10^{-6}$ ) based on 1 million binomial simulations; highest  
659 observed random interactions between alternative zinc-finger proteins and their reference  
660 proteins = 3 (39 times out of 1 million simulations), compared to detected interactions=5.

661 **Code availability.** Computer codes are available upon request with no restrictions.

662

663 **Data availability.** Alternative protein sequence databases for different species can be  
664 accessed at <https://www.roucoulab.com/p/downloads> with no restrictions.

665

666 **Cloning and antibodies.** Human Flag-tagged altMiD51(WT) and  
667 altMiD51(LYR→AAA), and HA-tagged DrP1(K38A) were cloned into pcDNA3.1  
668 (Invitrogen) using a Gibson assembly kit (New England Biolabs, E26115). The cDNA  
669 corresponding to human MiD51/MIEF1/SMCR7L transcript variant 1 (NM\_019008) was  
670 also cloned into pcDNA3.1 by Gibson assembly. In this construct, altMiD51 and MiD51  
671 were tagged with Flag and HA tags, respectively. MiD51<sup>GFP</sup> and altMiD51<sup>GFP</sup> were also  
672 cloned into pcDNA3.1 by Gibson assembly. For MiD51<sup>GFP</sup>, a LAP tag<sup>32</sup> was inserted  
673 between MiD51 and GFP. gBlocks were purchased from IDT. Human altDDIT3<sup>mCherry</sup>  
674 was cloned into pcDNA3.1 by Gibson assembly using coding sequence from transcript  
675 variant 1 (NM\_004083.5) and mCherry coding sequence from pLenti-myc-GLUT4-  
676 mCherry (Addgene plasmid # 64049). Human DDIT3<sup>GFP</sup> was also cloned into pcDNA3.1  
677 by Gibson assembly using CCDS8943 sequence.

678 For immunofluorescence, primary antibodies were diluted as follow: anti-Flag (Sigma,  
679 F1804) 1/1000, anti-TOM20 (Abcam, ab186734) 1/500. For western blots, primary  
680 antibodies were diluted as follow: anti-Flag (Sigma, F1804) 1/1000, anti-HA (BioLegend,  
681 901515) 1/500, anti-actin (Sigma, A5441) 1/10000, anti-Drp1 (BD Transduction  
682 Laboratories, 611112) 1/500, anti-GFP (Santa Cruz Biotechnology, sc-9996) 1/10000,  
683 anti-mCherry (Abcam, ab125096) 1/2000.

684

685 **Cell culture, immunofluorescence, knockdown and western blots.** HeLa cells (ATCC  
686 CRM-CCL-2, authenticated by STR profiling, RRID:CVCL\_0030) cultures tested  
687 negative for mycoplasma contamination (ATCC 30-1012K), transfections,  
688 immunofluorescence, confocal analyses and western blots were carried out as previously  
689 described<sup>87</sup>. Mitochondrial morphology was analyzed as previously described<sup>88</sup>. A  
690 minimum of 100 cells were counted (n=3 or 300 cells for each experimental condition).  
691 Three independent experiments were performed.  
692 For Drp1 knockdown, 25,000 HeLa cells in 24-well plates were transfected with 25 nM  
693 Drp1 SMARTpool: siGENOME siRNA (Dharmacon, M-012092-01-0005) or ON-  
694 TARGET plus Non-targeting pool siRNAs (Dharmacon, D-001810-10-05) with  
695 DharmaFECT 1 transfection reagent (Dharmacon, T-2001-02) according to the  
696 manufacturer's protocol. After 24h, cells were transfected with pcDNA3.1 or altMiD51,  
697 incubated for 24h, and processed for immunofluorescence or western blot. Colocalization  
698 analyses were performed using the JACoP plugin (Just Another Co-localization Plugin)<sup>50</sup>  
699 implemented in Image J software.  
700  
701 **Immunoprecipitations.** Immunoprecipitations experiments were conducted using GFP-  
702 Trap (ChromoTek) protocol with minor modifications. Briefly, cells were lysed with co-  
703 ip lysis buffer (0.5 % NP40, Tris-HCl 50 mM pH 7.5, NaCl 150 mM and two EDTA-free  
704 Roche protease inhibitors per 50 mL of buffer). After 5 mins of lysis on ice, lysate was  
705 sonicated twice at 11 % amplitude for 5 s with 3 minutes of cooling between sonication  
706 cycles. Lysate was centrifuged, supernatant was isolated and protein content was assessed  
707 using BCA assay (Pierce). GFP-Trap beads were conditioned with lysis buffer. 40 µL of

708 beads were added to 2 mg of proteins at a final concentration of 1 mg/mL. After  
709 overnight immunoprecipitation, beads were centrifuged at 5000 rpm for 5 minutes and  
710 supernatant was discarded. Beads were then washed three times with wash buffer (0.5 %  
711 NP40, Tris-HCl 50 mM pH 7.5, NaCl 200 mM and two EDTA-free Roche protease  
712 inhibitors per 50 mL of buffer) and supernatants were discarded. Immunoprecipitated  
713 proteins were eluted from beads by adding 40  $\mu$ L of Laemmli buffer and boiling at 95  $^{\circ}$ C  
714 for 15 minutes. Eluate was split in halves which were loaded onto 10 % SDS-PAGE gels to  
715 allow western blotting of GFP and mCherry tagged proteins. 40  $\mu$ g of initial lysates were  
716 loaded into gels as inputs.

717

718 **Mitochondrial localization, parameters and ROS production.** Trypan blue quenching  
719 experiment was performed as previously described<sup>89</sup>.

720 A flux analyzer (XF96 Extracellular Flux Analyzer; Seahorse Bioscience, Agilent  
721 technologies) was used to determine the mitochondrial function in HeLa cells  
722 overexpressing altMiD51<sup>Flag</sup>. Cells were plated in a XF96 plate (Seahorse Biosciences) at  
723  $1 \times 10^4$  cells per well in Dulbecco's modified Eagle's medium supplemented with 10%  
724 FBS with antibiotics. After 24 hours, cells were transfected for 24 hours with an empty  
725 vector (pcDNA3.1) or with the same vector expressing altMiD51<sup>Flag</sup> with GeneCellin  
726 tranfection reagent according to the manufacturer's instructions. Cells were equilibrated  
727 in XF assay media supplemented with 25 mM glucose and 1 mM pyruvate and were  
728 incubated at 37 $^{\circ}$ C in a CO<sub>2</sub>-free incubator for 1 h. Baseline oxygen consumption rates  
729 (OCRs) of the cells were recorded with a mix/wait/measure times of 3/0/3 min  
730 respectively. Following these measurements, oligomycin (1  $\mu$ M), FCCP (0.5  $\mu$ M), and



731 antimycin A/rotenone (1  $\mu$ M) were sequentially injected, with oxygen consumption rate  
732 measurements recorded after each injection. Data were normalized to total protein in each  
733 well. For normalization, cells were lysed in the 96-well XF plates using 15  $\mu$ l/well of  
734 RIPA lysis buffer (1% Triton X-100, 1% NaDeoxycholate, 0.1% SDS, 1 mM EDTA, 50  
735 mM Tris-HCl pH 7.5). Protein concentration was measured using the BCA protein assay  
736 reagent (Pierce, Waltham, MA, USA).

737 Reactive oxygen species (ROS) levels were measured using Cellular ROS/Superoxide  
738 Detection Assay Kit (Abcam #139476). HeLa cells were seeded onto 96-well black/clear  
739 bottom plates at a density of 6,000 cells per well with 4 replicates for each condition.  
740 After 24 hours, cells were transfected for 24 hours with an empty vector (pcDNA3.1) or  
741 with the same vector expressing altMiD51<sup>Flag</sup> with GeneCellin according to the  
742 manufacturer's instruction. Cells were untreated or incubated with the ROS inhibitor (N-  
743 acetyl-L-cysteine) at 10 mM for 1 hour. Following this, the cells were washed twice with  
744 the wash solution and then labeled for 1 hour with the Oxidative Stress Detection  
745 Reagent (green) diluted 1:1000 in the wash solution with or without the positive control  
746 ROS Inducer Pyocyanin at 100  $\mu$ M. Fluorescence was monitored in real time. ROS  
747 accumulation rate was measured between 1 to 3 hours following induction. After the  
748 assay, total cellular protein content was measured using BCA protein assay reagent  
749 (Pierce, Waltham, MA, USA) after lysis with RIPA buffer. Data were normalised for  
750 initial fluorescence and protein concentration.

751 ATP synthesis was measured as previously described<sup>90</sup> in cells transfected for 24 hours  
752 with an empty vector (pcDNA3.1) or with the same vector expressing altMiD51<sup>Flag</sup>.  
753

754 **Acknowledgements**

755 This research was supported by CIHR grants MOP-137056 and MOP-136962 to X.R;  
756 MOP-299432 and MOP-324265 to C.L; a *Université de Sherbrooke* institutional research  
757 grant made possible through a generous donation by Merck Sharp & Dohme to X.R; a  
758 FRQNT team grant 2015-PR-181807 to C.L. and X.R; Canada Research Chairs in  
759 Functional Proteomics and Discovery of New Proteins to X.R, in Evolutionary Cell and  
760 Systems Biology to C.L and in Computational and Biological Complexity to A.O; A.A.C  
761 is supported by a CIHR New Investigator Salary Award; M.S.S is a recipient of a *Fonds*  
762 *de Recherche du Québec – Santé* Research Scholar Junior 2 Career Award; V.D is  
763 supported in part by fellowships from *Région Nord-Pas de Calais* and PROTEO; A.A.C,  
764 D.J.H, M.S.S and X.R are members of the *Fonds de Recherche du Québec Santé-*  
765 *supported Centre de Recherche du Centre Hospitalier Universitaire de Sherbrooke*. We  
766 thank the staff from the Centre for Computational Science at the *Université de*  
767 *Sherbrooke*, Compute Canada and Compute Québec for access to the Mammoth  
768 supercomputer.

769

770

771 **References**

- 772 1. Ingolia, N. T., Lareau, L. F. & Weissman, J. S. Ribosome profiling of mouse  
773 embryonic stem cells reveals the complexity and dynamics of mammalian  
774 proteomes. *Cell* **147**, 789–802 (2011).
- 775 2. Lee, S. S. *et al.* Global mapping of translation initiation sites in mammalian cells at  
776 single-nucleotide resolution. *Proc. Natl. Acad. Sci. U. S. A.* **109**, E2424-2432  
777 (2012).
- 778 3. Mouilleron, H., Delcourt, V. & Roucou, X. Death of a dogma: eukaryotic mRNAs  
779 can code for more than one protein. *Nucleic Acids Res.* **44**, 14–23 (2015).
- 780 4. Pauli, A. *et al.* Toddler: An Embryonic Signal That Promotes Cell Movement via  
781 Apelin Receptors. *Science* **343**, 1248636–1248636 (2014).
- 782 5. Anderson, D. M. *et al.* A Micropeptide Encoded by a Putative Long Noncoding  
783 RNA Regulates Muscle Performance. *Cell* **160**, 595–606 (2015).
- 784 6. Zanet, J. *et al.* Pri sORF peptides induce selective proteasome-mediated protein  
785 processing. *Science* **349**, 1356–1358 (2015).
- 786 7. Nelson, B. R. *et al.* A peptide encoded by a transcript annotated as long noncoding  
787 RNA enhances SERCA activity in muscle. *Science (80-. ).* **351**, 271–275 (2016).
- 788 8. Bazzini, A. A. *et al.* Identification of small ORFs in vertebrates using ribosome  
789 footprinting and evolutionary conservation. *EMBO J.* **33**, 981–993 (2014).
- 790 9. Ji, Z., Song, R., Regev, A. & Struhl, K. Many lncRNAs, 5'UTRs, and pseudogenes  
791 are translated and some are likely to express functional proteins. *Elife* **4**, e08890  
792 (2015).
- 793 10. Prabakaran, S. *et al.* Quantitative profiling of peptides from RNAs classified as

- 794 noncoding. *Nat. Commun.* **5**, 5429 (2014).
- 795 11. Slavoff, S. a *et al.* Peptidomic discovery of short open reading frame-encoded  
796 peptides in human cells. *Nat. Chem. Biol.* **9**, 59–64 (2013).
- 797 12. Andrews, S. J. & Rothnagel, J. A. Emerging evidence for functional peptides  
798 encoded by short open reading frames. *Nat. Rev. Genet.* **15**, 193–204 (2014).
- 799 13. Landry, C. R., Zhong, X., Nielly-Thibault, L. & Roucou, X. Found in translation:  
800 Functions and evolution of a recently discovered alternative proteome. *Curr. Opin.*  
801 *Struct. Biol.* **32**, 74–80 (2015).
- 802 14. Fields, A. P. *et al.* A Regression-Based Analysis of Ribosome-Profiling Data  
803 Reveals a Conserved Complexity to Mammalian Translation. *Mol. Cell* **60**, 816–  
804 827 (2015).
- 805 15. Saghatelian, A. & Couso, J. P. Discovery and characterization of smORF-encoded  
806 bioactive polypeptides. *Nat. Chem. Biol.* **11**, 909–16 (2015).
- 807 16. Stock, D., Leslie, A. G. & Walker, J. E. Molecular architecture of the rotary motor  
808 in ATP synthase. *Science* **286**, 1700–1705 (1999).
- 809 17. Schmitt, J. P. *et al.* Dilated cardiomyopathy and heart failure caused by a mutation  
810 in phospholamban. *Science* **299**, 1410–1413 (2003).
- 811 18. Nemeth, E. *et al.* Heparin regulates cellular iron efflux by binding to ferroportin  
812 and inducing its internalization. *Science* **306**, 2090–2093 (2004).
- 813 19. Carvunis, A.-R. *et al.* Proto-genes and de novo gene birth. *Nature* 3–7 (2012).  
814 doi:10.1038/nature11184
- 815 20. Schlötterer, C. Genes from scratch--the evolutionary fate of de novo genes. *Trends*  
816 *Genet.* **31**, 215–9 (2015).

- 817 21. McLysaght, A. & Hurst, L. D. Open questions in the study of de novo genes: what,  
818 how and why. *Nat. Rev. Genet.* **17**, 567–578 (2016).
- 819 22. Sabath, N., Wagner, A. & Karlin, D. Evolution of viral proteins originated de novo  
820 by overprinting. *Mol. Biol. Evol.* **29**, 3767–80 (2012).
- 821 23. Iacono, M., Mignone, F. & Pesole, G. uAUG and uORFs in human and rodent  
822 5'untranslated mRNAs. *Gene* **349**, 97–105 (2005).
- 823 24. Neafsey, D. E. & Galagan, J. E. Dual modes of natural selection on upstream open  
824 reading frames. *Mol. Biol. Evol.* **24**, 1744–51 (2007).
- 825 25. Smith, E. *et al.* Leaky ribosomal scanning in mammalian genomes: significance of  
826 histone H4 alternative translation in vivo. *Nucleic Acids Res.* **33**, 1298–1308  
827 (2005).
- 828 26. Pop, C. *et al.* Causal signals between codon bias, mRNA structure, and the  
829 efficiency of translation and elongation. *Mol. Syst. Biol.* **10**, 770 (2014).
- 830 27. Pollard, K. S., Hubisz, M. J., Rosenbloom, K. R. & Siepel, A. Detection of  
831 nonneutral substitution rates on mammalian phylogenies. *Genome Res.* **20**, 110–  
832 121 (2010).
- 833 28. Michel, A. M. *et al.* GWIPS-viz: development of a ribo-seq genome browser.  
834 *Nucleic Acids Res.* **42**, D859-864 (2014).
- 835 29. Raj, A. *et al.* Thousands of novel translated open reading frames in humans  
836 inferred by ribosome footprint profiling. *Elife* **5**, 1–24 (2016).
- 837 30. Miettinen, T. P. & Björklund, M. Modified ribosome profiling reveals high  
838 abundance of ribosome protected mRNA fragments derived from 3' untranslated  
839 regions. *Nucleic Acids Res.* **43**, 1019–1034 (2015).

- 840 31. Weingarten-Gabbay, S. *et al.* Systematic discovery of cap-independent translation  
841 sequences in human and viral genomes. *Science (80-. )*. **351**, 1–24 (2016).
- 842 32. Hein, M. Y. *et al.* A Human Interactome in Three Quantitative Dimensions  
843 Organized by Stoichiometries and Abundances. *Cell* **163**, 712–723 (2015).
- 844 33. Tong, J., Taylor, P. & Moran, M. F. Proteomic analysis of the epidermal growth  
845 factor receptor (EGFR) interactome and post-translational modifications associated  
846 with receptor endocytosis in response to EGF and stress. *Mol. Cell. Proteomics* **13**,  
847 1644–1658 (2014).
- 848 34. Sharma, K. *et al.* Ultradeep Human Phosphoproteome Reveals a Distinct  
849 Regulatory Nature of Tyr and Ser/Thr-Based Signaling. *Cell Rep.* **8**, 1583–1594  
850 (2014).
- 851 35. Rosenberger, G. *et al.* A repository of assays to quantify 10,000 human proteins by  
852 SWATH-MS. *Sci. data* **1**, 140031 (2014).
- 853 36. Mitchell, A. *et al.* The InterPro protein families database: the classification  
854 resource after 15 years. *Nucleic Acids Res.* **43**, D213–221 (2014).
- 855 37. Vanderperre, B. *et al.* Direct detection of alternative open reading frames  
856 translation products in human significantly expands the proteome. *PLoS One* **8**,  
857 e70698 (2013).
- 858 38. Wolfe, S. A., Nekludova, L. & Pabo, C. O. DNA recognition by Cys2His2 zinc  
859 finger proteins. *Annu. Rev. Biophys. Biomol. Struct.* **29**, 183–212 (2000).
- 860 39. Laity, J. H., Lee, B. M. & Wright, P. E. Zinc finger proteins: new insights into  
861 structural and functional diversity. *Curr. Opin. Struct. Biol.* **11**, 39–46 (2001).
- 862 40. Karimpour-Fard, A., Detweiler, C. S., Erickson, K. D., Hunter, L. & Gill, R. T.

- 863 Cross-species cluster co-conservation: a new method for generating protein  
864 interaction networks. *Genome Biol.* **8**, R185 (2007).
- 865 41. Schmitges, F. W. *et al.* Multiparameter functional diversity of human C2H2 zinc  
866 finger proteins. *Genome Res.* **26**, 1742–1752 (2016).
- 867 42. Andreev, D. E. *et al.* Translation of 5' leaders is pervasive in genes resistant to  
868 eIF2 repression. *Elife* **4**, e03971 (2015).
- 869 43. Kim, M.-S. *et al.* A draft map of the human proteome. *Nature* **509**, 575–581  
870 (2014).
- 871 44. Angerer, H. Eukaryotic LYR Proteins Interact with Mitochondrial Protein  
872 Complexes. *Biology (Basel)*. **4**, 133–150 (2015).
- 873 45. Losón, O. C., Song, Z., Chen, H. & Chan, D. C. Fis1, Mff, MiD49, and MiD51  
874 mediate Drp1 recruitment in mitochondrial fission. *Mol. Biol. Cell* **24**, 659–667  
875 (2013).
- 876 46. Motori, E. *et al.* Inflammation-Induced Alteration of Astrocyte Mitochondrial  
877 Dynamics Requires Autophagy for Mitochondrial Network Maintenance. *Cell*  
878 *Metab.* **18**, 844–859 (2013).
- 879 47. Smirnova, E., Shurland, D. L., Ryazantsev, S. N. & van der Bliek, A. M. A human  
880 dynamin-related protein controls the distribution of mitochondria. *J. Cell Biol.*  
881 **143**, 351–358 (1998).
- 882 48. Cui, K., Coutts, M., Stahl, J. & Sytkowski, A. J. Novel interaction between the  
883 transcription factor CHOP (GADD153) and the ribosomal protein FTE/S3a  
884 modulates erythropoiesis. *J. Biol. Chem.* **275**, 7591–6 (2000).
- 885 49. Chiribau, C.-B., Gaccioli, F., Huang, C. C., Yuan, C. L. & Hatzoglou, M.

- 886 Molecular symbiosis of CHOP and C/EBP beta isoform LIP contributes to  
887 endoplasmic reticulum stress-induced apoptosis. *Mol. Cell. Biol.* **30**, 3722–31  
888 (2010).
- 889 50. Bolte, S. & Cordelières, F. P. A guided tour into subcellular colocalization analysis  
890 in light microscopy. *J. Microsc.* **224**, 213–32 (2006).
- 891 51. Couso, J.-P. & Patraquim, P. Classification and function of small open reading  
892 frames. *Nat. Rev. Mol. Cell Biol.* (2017). doi:10.1038/nrm.2017.58
- 893 52. Johnstone, T. G., Bazzini, A. A. & Giraldez, A. J. Upstream ORFs are prevalent  
894 translational repressors in vertebrates. *EMBO J.* (2016).  
895 doi:10.15252/embj.201592759
- 896 53. Jousse, C. *et al.* Inhibition of CHOP translation by a peptide encoded by an open  
897 reading frame localized in the chop 5'UTR. *Nucleic Acids Res.* **29**, 4341–51  
898 (2001).
- 899 54. Young, S. K., Palam, L. R., Wu, C., Sachs, M. S. & Wek, R. C. Ribosome  
900 Elongation Stall Directs Gene-specific Translation in the Integrated Stress  
901 Response. *J. Biol. Chem.* **291**, 6546–6558 (2016).
- 902 55. Lee, Y. C. G. & Reinhardt, J. A. Widespread Polymorphism in the Positions of  
903 Stop Codons in *Drosophila melanogaster*. *Genome Biol. Evol.* **4**, 533–549 (2012).
- 904 56. Andreatta, M. E. *et al.* The Recent De Novo Origin of Protein C-Termini. *Genome*  
905 *Biol. Evol.* **7**, 1686–701 (2015).
- 906 57. Knowles, D. G. & McLysaght, A. Recent de novo origin of human protein-coding  
907 genes. *Genome Res.* **19**, 1752–9 (2009).
- 908 58. Neme, R. & Tautz, D. Phylogenetic patterns of emergence of new genes support a



- 909 model of frequent de novo evolution. *BMC Genomics* **14**, 117 (2013).
- 910 59. Vaudel, M. *et al.* PeptideShaker enables reanalysis of MS-derived proteomics data  
911 sets. *Nat. Biotechnol.* **33**, 22–24 (2015).
- 912 60. Shteynberg, D. *et al.* iProphet: multi-level integrative analysis of shotgun  
913 proteomic data improves peptide and protein identification rates and error  
914 estimates. *Mol. Cell. Proteomics* **10**, M111.007690 (2011).
- 915 61. Quelle, D. E., Zindy, F., Ashmun, R. A. & Sherr, C. J. Alternative reading frames  
916 of the INK4a tumor suppressor gene encode two unrelated proteins capable of  
917 inducing cell cycle arrest. *Cell* **83**, 993–1000 (1995).
- 918 62. Abramowitz, J., Grenet, D., Birnbaumer, M., Torres, H. N. & Birnbaumer, L.  
919 XLalphas, the extra-long form of the alpha-subunit of the Gs G protein, is  
920 significantly longer than suspected, and so is its companion Alex. *Proc. Natl.*  
921 *Acad. Sci. U. S. A.* **101**, 8366–8371 (2004).
- 922 63. Bergeron, D. *et al.* An out-of-frame overlapping reading frame in the ataxin-1  
923 coding sequence encodes a novel ataxin-1 interacting protein. *J. Biol. Chem.* **288**,  
924 21824–35 (2013).
- 925 64. Lee, C. -f. C., Lai, H.-L. H.-L., Lee, Y.-C., Chien, C.-L. C.-L. & Chern, Y. The  
926 A2A Adenosine Receptor Is a Dual Coding Gene: A NOVEL MECHANISM OF  
927 GENE USAGE AND SIGNAL TRANSDUCTION. *J. Biol. Chem.* **289**, 1257–  
928 1270 (2014).
- 929 65. Yosten, G. L. C. *et al.* A 5'-Upstream short open reading frame encoded peptide  
930 regulates angiotensin type 1a receptor production and signaling via the beta-  
931 arrestin pathway. *J. Physiol.* **6**, n/a-n/a (2015).

- 932 66. Rice, P., Longden, I. & Bleasby, A. EMBOSS: the European Molecular Biology  
933 Open Software Suite. *Trends Genet.* **16**, 276–277 (2000).
- 934 67. Kozak, M. Pushing the limits of the scanning mechanism for initiation of  
935 translation. *Gene* **299**, 1–34 (2002).
- 936 68. Fritsch, C. *et al.* Genome-wide search for novel human uORFs and N-terminal  
937 protein extensions using ribosomal footprinting. *Genome Res.* **22**, 2208–2218  
938 (2012).
- 939 69. Stern-Ginossar, N. *et al.* Decoding human cytomegalovirus. *Science* **338**, 1088–93  
940 (2012).
- 941 70. Gao, X. *et al.* Quantitative profiling of initiating ribosomes in vivo. *Nat. Methods*  
942 **12**, 147–53 (2015).
- 943 71. Langmead, B. & Salzberg, S. L. Fast gapped-read alignment with Bowtie 2. *Nat.*  
944 *Methods* **9**, 357–9 (2012).
- 945 72. Sonnhammer, E. L. L. & Östlund, G. InParanoid 8: orthology analysis between  
946 273 proteomes, mostly eukaryotic. *Nucleic Acids Res.* **43**, D234–239 (2015).
- 947 73. Remm, M., Storm, C. E. & Sonnhammer, E. L. Automatic clustering of orthologs  
948 and in-paralogs from pairwise species comparisons. *J. Mol. Biol.* **314**, 1041–1052  
949 (2001).
- 950 74. Tarailo-Graovac, M. & Chen, N. Using RepeatMasker to identify repetitive  
951 elements in genomic sequences. *Curr. Protoc. Bioinformatics* **Chapter 4**, Unit  
952 4.10 (2009).
- 953 75. Jones, P. *et al.* InterProScan 5: genome-scale protein function classification.  
954 *Bioinformatics* **30**, 1236–1240 (2014).

- 955 76. Na, D., Son, H. & Gsponer, J. Categorizer: a tool to categorize genes into user-  
956 defined biological groups based on semantic similarity. *BMC Genomics* **15**, 1091  
957 (2014).
- 958 77. Vaudel, M., Barsnes, H., Berven, F. S., Sickmann, A. & Martens, L. SearchGUI:  
959 An open-source graphical user interface for simultaneous OMSSA and X!Tandem  
960 searches. *Proteomics* **11**, 996–999 (2011).
- 961 78. Craig, R. & Beavis, R. C. TANDEM: matching proteins with tandem mass spectra.  
962 *Bioinformatics* **20**, 1466–1467 (2004).
- 963 79. Kim, S. & Pevzner, P. A. MS-GF+ makes progress towards a universal database  
964 search tool for proteomics. *Nat. Commun.* **5**, 5277 (2014).
- 965 80. Tabb, D. L., Fernando, C. G. & Chambers, M. C. MyriMatch: highly accurate  
966 tandem mass spectral peptide identification by multivariate hypergeometric  
967 analysis. *J. Proteome Res.* **6**, 654–661 (2007).
- 968 81. Eng, J. K., Jahan, T. A. & Hoopmann, M. R. Comet: an open-source MS/MS  
969 sequence database search tool. *Proteomics* **13**, 22–24 (2013).
- 970 82. Geer, L. Y. *et al.* Open mass spectrometry search algorithm. *J. Proteome Res.* **3**,  
971 958–64 (2004).
- 972 83. Menschaert, G. & Fenyö, D. Proteogenomics from a bioinformatics angle: A  
973 growing field. *Mass Spectrom. Rev.* **36**, 584–599 (2015).
- 974 84. Woo, S. *et al.* Proteogenomic strategies for identification of aberrant cancer  
975 peptides using large-scale next-generation sequencing data. *Proteomics* **14**, 2719–  
976 30 (2014).
- 977 85. Gatto, L., Breckels, L. M., Naake, T. & Gibb, S. Visualization of proteomics data

- 978 using R and Bioconductor. *Proteomics* **15**, 1375–1389 (2015).
- 979 86. Perkins, D. N., Pappin, D. J. C., Creasy, D. M. & Cottrell, J. S. Probability-based  
980 protein identification by searching sequence databases using mass spectrometry  
981 data. *Electrophoresis* **20**, 3551–3567 (1999).
- 982 87. Vanderperre, B. *et al.* An overlapping reading frame in the PRNP gene encodes a  
983 novel polypeptide distinct from the prion protein. *FASEB J.* **25**, 2373–86 (2011).
- 984 88. Palmer, C. S. *et al.* MiD49 and MiD51, new components of the mitochondrial  
985 fission machinery. *EMBO Rep.* **12**, 565–573 (2011).
- 986 89. Vanderperre, B. *et al.* MPC1-like: a Placental Mammal-Specific Mitochondrial  
987 Pyruvate Carrier Subunit Expressed in Post-Meiotic Male Germ Cells. *J. Biol.*  
988 *Chem.* (2016). doi:10.1074/jbc.M116.733840
- 989 90. Vives-Bauza, C., Yang, L. & Manfredi, G. Assay of Mitochondrial ATP Synthesis  
990 in Animal Cells and Tissues. *Methods Cell Biol* **80**, 155–171 (2007).
- 991

992 **FIGURE LEGENDS**

993

994 **Figure 1. Annotation of human altORFs.**

995 (a) AltORF nomenclature. AltORFs partially overlapping the CDS must be in a different  
996 reading frame. (b) Pipeline for the identification of altORFs. (c) Size distribution of  
997 alternative (empty bars, vertical and horizontal axes) and reference (grey bars, secondary  
998 horizontal and vertical axes) proteins. Arrows indicate the median size. The median  
999 alternative protein length is 45 amino acids (AA) compared to 460 for the reference  
1000 proteins. (d) Distribution of altORFs in the human hg38 transcriptome. (e, f) Number of  
1001 total altORFs (e) or number of altORFs/10kbs (f) in hg38 compared to shuffled hg38.  
1002 Means and standard deviations for 100 replicates obtained by sequence shuffling are  
1003 shown. Statistical significance was determined by using one sample t-test with two-tailed  
1004 *p*-values. \*\*\*\* *p*<0.0001. (g) Percentage of altORFs with an optimal Kozak motif. The  
1005 total number of altORFs with an optimal Kozak motif is also indicated at the top.

1006

1007 **Figure 1-figure supplement 1. 10% of altORFs are present in different classes of**  
1008 **repeats.**

1009 While more than half of the human genome is composed of repeated sequences, only  
1010 9.83% or 18,003 altORFs are located inside these repeats (a), compared to 2,45% or  
1011 1,677 CDSs (b). AltORFs and CDSs are detected in non-LTR retrotransposons (LINEs,  
1012 SINEs, SINE-VNTR-Alus), LTR repeats, DNA repeats, satellites and other repeats.  
1013 Proportions were determined using RepeatMasker (version 3.3.0).

1014

1015 **Figure 1-figure supplement 2. The proportion of altORFs with a translation**  
1016 **initiation site (TIS) with a Kozak motif in hg38 is significantly different from 100**  
1017 **shuffled hg38 transcriptomes.**

1018 Percentage of altORFs with a TIS within an optimal Kozak sequence in hg38 (dark blue)  
1019 compared to 100 shuffled hg38 (light blue). Mean and standard deviations for sequence  
1020 shuffling are displayed, and significant difference was defined by using one sample t test.  
1021 \*\*\*\*  $P < 0.0001$ . Note that shuffling all transcripts in the hg38 transcriptome generates a  
1022 total of 489,073 altORFs on average, compared to 539,134 altORFs in hg38. Most  
1023 transcripts result from alternative splicing and there are 183,191 unique altORFs in the  
1024 hg38 transcriptome, while the 489,073 altORFs in shuffled transcriptomes are all unique.  
1025 Figure 1g shows the percentage of unique altORFs with a kozak motif (15%), while the  
1026 current Fig. shows the percentage of altORFs with a kozak motif relative to the total  
1027 number of altORFs (14%).

1028

1029 **Figure 2. Conservation of alternative and reference proteins across different species.**

1030 (a) Number of orthologous and paralogous alternative and reference proteins between *H.*  
1031 *sapiens* and other species (pairwise study). (b) Phylogenetic tree: conservation of  
1032 alternative (blue) and reference (red) proteins across various eukaryotic species. (c)  
1033 Number and fraction of genes encoding homologous reference proteins or at least 1  
1034 homologous alternative protein between *H. sapiens* and other species (pairwise study).

1035

1036 **Figure 3. Number of orthologous and co-conserved alternative and reference**  
1037 **proteins between *H. sapiens* and other species (pairwise).** For the co-conservation

1038 analyses, the percentage of observed (Obs.), expected (Exp.) and corresponding  $p$ -values  
1039 relative to the total number of reference-alternative protein pairs are indicated on the right  
1040 (see Table 2 for details).

1041

1042 **Figure 4. AltORFs completely nested within CDSs show more extreme PhyloP values**

1043 **(more conserved or faster evolving) than their CDSs.** Differences between altORF and

1044 CDS PhyloP scores (altORF PhyloP – CDS PhyloP,  $y$ -axis) are plotted against PhyloPs

1045 for their respective CDSs ( $x$ -axis). We restricted the analysis to altORF-CDS pairs that

1046 were co-conserved from humans to zebrafish. The plot contains 889 CDSs containing at

1047 least one fully nested altORF, paired with one of its altORFs selected at random (to avoid

1048 problems with statistical non-independence). PhyloPs for both altORFs and CDSs are

1049 based on 3rd codons in the CDS reading frame, calculated across 100 vertebrate species.

1050 We compared these differences to those generated based on five random regions in CDSs

1051 with a similar length as altORFs. Expected quantiles of the differences (“DQ” columns)

1052 were identified and compared to the observed differences. We show the absolute numbers

1053 (“ $n$ ”) and observed-to-expected ratios (“O/E”) for each quantile. There are clearly

1054 substantial over-representations of extreme values (red signaling conservation DQ 0.95,

1055 and blue signaling accelerated evolution DQ 0.05) with 317 of 889 altORFs (35.7%). A

1056 random distribution would have implied a total of 10% (or 89) of altORFs in the extreme

1057 values. This suggests that 25.7% (35.7%-10%) of these 889 altORFs undergo specific

1058 selection different from random regions in their CDSs with a similar length distribution.

1059 This percentage is very similar to the 26.2% obtained from an analysis of altORFs

1060 without restriction based on co-conservation in vertebrates (see Figure 4-figure

1061 supplement 1), a total which would imply that there are about 4,458 altORFs fully nested  
1062 in CDSs undergoing conserved or accelerated evolution relative to their CDSs.

1063

1064 **Figure 4-figure supplement 1. AltORFs completely nested within CDSs show more**  
1065 **extreme PhyloP values (more conserved or faster evolving) than their CDSs.**

1066 Differences between altORF and CDS PhyloP scores (altORF PhyloP – CDS PhyloP, y-  
1067 axis) are plotted against PhyloPs for their respective CDSs (x-axis). The plot contains all  
1068 20,814 CDSs containing at least one fully nested altORF, paired with one of its altORFs  
1069 selected at random (to avoid problems with statistical non-independence). PhyloPs for  
1070 both altORFs and CDSs are based on third codon positions in the CDS reading frame,  
1071 calculated across 100 vertebrate species. We compared these differences to those  
1072 generated based on five random regions in CDSs with a similar length as altORFs.

1073 Expected quantiles of the differences (“DQ” columns) were identified and compared to  
1074 the observed differences. We show the absolute numbers (“n”) and observed-to-expected  
1075 ratios (“O/E”) for each quantile. There are clearly substantial over-representations of  
1076 extreme values (red signalling conservation  $DQ \geq 0.95$ , and blue signalling accelerated  
1077 evolution  $DQ \leq 0.05$ ) with 6,428 of 19,705 altORFs (36.2%). A random distribution would  
1078 have implied a total of 10% (or 1,970) of altORFs in the extreme values. This suggests  
1079 that 26.2% (36.2%-10%) of altORFs (or 4,458) undergo specific selection different from  
1080 random regions in their CDSs with a similar length distribution.

1081

1082 **Figure 5. First, second, and third codon nucleotide PhyloP scores for 100 vertebrate**  
1083 **species for the CDSs of the *NTNG1*, *RET* and *VTH1A* genes.** Chromosomal coordinates



1084 for the different CDSs and altORFs are indicated on the right. The regions highlighted in  
1085 red indicate the presence of an altORF characterized by a region with elevated PhyloP  
1086 scores for wobble nucleotides. The region of the altORF is indicated by a black bar above  
1087 each graph.

1088

### 1089 **Figure 6. Expression of human altORFs.**

1090 **(a)** Percentage of CDSs and altORFs with detected TISs by ribosomal profiling and  
1091 footprinting of human cells<sup>23</sup>. The total number of CDSs and altORFs with a detected TIS  
1092 is indicated at the top. **(b)** Alternative and reference proteins detected in three large  
1093 proteomic datasets: human interactome<sup>32</sup>, 10,000 human proteins<sup>35</sup>, human  
1094 phosphoproteome<sup>34</sup>, EGFR interactome<sup>33</sup>. Numbers are indicated above each column. **(c)**  
1095 Percentage of altORFs encoding alternative proteins detected by MS-based proteomics.  
1096 The total number of altORFs is indicated at the top. Localization “Unknown” indicates  
1097 that the detected peptides can match more than one alternative protein. Localization “>1”  
1098 indicates that the altORF can have more than one localization in different RNA isoforms.  
1099

### 1100 **Figure 6-figure supplement 1. Spectra validation for altSLC35A4<sup>5'</sup>**

1101 Example of validation for altSLC35A4<sup>5'</sup> specific peptide  
1102 RVEDEVNSGVGQDGSLLSSPFLK. **(a)** Experimental MS/MS spectra (PeptideShaker  
1103 graphic interface output). **(b)** MS/MS spectra of the synthetic peptide.  
1104 Matching peaks are shown with blue masks. A diagram of the transcript with its accession  
1105 number and the localization of the altORF and the CDS is shown at the top.  
1106

1107 **Figure 6-figure supplement 2. Spectra validation for altRELT<sup>5'</sup>**

1108 Example of validation for altRELT<sup>5'</sup> specific peptide VALELLK. **(a)** Experimental  
1109 MS/MS spectra (PeptideShaker graphic interface output). **(b)** MS/MS spectra of the  
1110 synthetic peptide.  
1111 Matching peaks are shown with blue masks. A diagram of the transcript with its accession  
1112 number and the localization of the altORF and the CDS is shown at the top.

1113

1114 **Figure 6-figure supplement 3. Spectra validation for altLINC01420<sup>nc</sup>**

1115 Example of validation for altLINC01420<sup>nc</sup> specific peptide  
1116 WDYPEGTPNGGSTTLPSAPPASAGLK. **(a)** Experimental MS/MS spectra  
1117 (PeptideShaker graphic interface output). **(b)** MS/MS spectra of the synthetic peptide.  
1118 Matching peaks are shown with blue masks. A diagram of the transcript with its accession  
1119 number and the localization of the altORF is shown at the top.

1120

1121 **Figure 6-figure supplement 4. Spectra validation for altSRRM2<sup>CDS</sup>**

1122 Example of validation for altSRRM2<sup>CDS</sup> specific peptide EVILDPDLPSGVGPGGLHR.  
1123 **(a)** Experimental MS/MS spectra (PeptideShaker graphic interface output). **(b)** MS/MS  
1124 spectra of the synthetic peptide.  
1125 Matching peaks are shown with blue masks. A diagram of the transcript with its accession  
1126 number and the localization of the altORF and the CDS is shown at the top.

1127

1128 **Figure 7. The alternative phosphoproteome in mitosis and EGF-treated cells.**

1129 Heatmap showing relative levels of spectral counts for phosphorylated peptides following

1130 the indicated treatment<sup>34</sup>. For each condition, heatmap colors show the percentage of  
1131 spectral count on total MS/MS phosphopeptide spectra. Blue bars on the right represent  
1132 the number of MS/MS spectra; only proteins with spectral counts above 10 are shown.

1133

1134 **Figure 7-figure supplement 1: Example of a phosphorylated peptide in mitosis -**  
1135 **alternative protein AltLINC01420<sup>nc</sup> (LOC550643, IP\_305449.1).**

1136 (a) AltLINC01420<sup>nc</sup> amino acid sequence with detected peptides underlined and  
1137 phosphorylated peptide in bold (73,9% sequence coverage). (b) MS/MS spectrum for the  
1138 phosphorylated peptide (PeptideShaker graphic interface output). The phosphorylation  
1139 site is the tyrosine residue, position 2. (c) MS/MS spectrum for the non-phosphorylated  
1140 peptide. The mass difference between the precursor ions between both spectra  
1141 corresponds to that of a phosphorylation, confirming the specific phosphorylation of this  
1142 residue in mitosis.

1143

1144 **Figure 8. Number of alternative proteins detected by ribosome profiling and mass**  
1145 **spectrometry.**

1146 The expression of 467 alternative proteins was detected by both ribosome profiling  
1147 (translation initiation sites, TIS) and mass spectrometry (MS).

1148

1149 **Figure 9. Human alternative proteome sequence analysis and classification using**  
1150 **InterProScan.**

1151 (a) InterPro annotation pipeline. (b) Alternative and reference proteins with InterPro  
1152 signatures. (c) Number of alternative and reference proteins with transmembrane domains

1153 (TM), signal peptides (S) and both TM and SP. **(d)** Number of all alternative and  
1154 reference proteins predicted to be intracellular, membrane, secreted and membrane-  
1155 spanning and secreted. <sup>1</sup>Proteins with at least one InterPro signature; <sup>2</sup>Proteins with no  
1156 predicted signal peptide or transmembrane features. **(e)** Number of predicted TM regions  
1157 for alternative and reference proteins.

1158

1159 **Figure 9-figure supplement 1: Alternative proteome sequence analysis and**  
1160 **classification in *P. troglodytes*, *M. musculus*, *B. Taurus*, *D. melanogaster* and *S.***  
1161 ***cerevisiae*.**

1162 For each organism, the number of InterPro signatures (top graphs) and proteins with  
1163 transmembrane (TM), signal peptide (SP), or TM+SP features (bottom pie charts) is  
1164 indicated for alternative and reference proteins.

1165

1166 **Figure 10. Gene ontology (GO) annotations for human alternative proteins.**

1167 GO terms assigned to InterPro entries are grouped into 13 categories for each of the three  
1168 ontologies. **(a)** 34 GO terms were categorized into cellular component for 107 alternative  
1169 proteins. **(b)** 64 GO terms were categorized into biological process for 128 alternative  
1170 proteins. **(c)** 94 GO terms were categorized into molecular function for 302 alternative  
1171 proteins. The majority of alternative proteins with GO terms are predicted to be  
1172 intracellular, to function in nucleic acid-binding, catalytic activity and protein binding  
1173 and to be involved in biosynthesis and nucleic acid metabolism processes.

1174

1175 **Figure 11. Main InterPro entries in human alternative proteins. (a)** The top 10

1176 InterPro families in the human alternative proteome. **(b)** A total of 110 alternative  
1177 proteins have between 1 and 23 zinc finger domains.

1178

1179 **Figure 12. Reference and alternative proteins share functional domains.**

1180 **(a)** Distribution of the number of shared InterPro entries between alternative and  
1181 reference proteins coded by the same transcripts. 138 pairs of alternative and reference  
1182 proteins share between 1 and 4 protein domains (InterPro entries). Only  
1183 alternative/reference protein pairs that have at least one domain are considered (n = 298).

1184 **(b)** The number of reference/alternative protein pairs that share domains (n = 138) is  
1185 higher than expected by chance alone. The distribution of expected pairs sharing domains  
1186 and the observed number are shown. **(c)** Matrix of co-occurrence of domains related to  
1187 zinc fingers. The entries correspond to the number of times entries co-occur in reference  
1188 and alternative proteins. The full matrix is available in figure 12-figure supplement 1.

1189

1190 **Figure 12-figure supplement 1. Matrix of co-occurrence of InterPro entries between**  
1191 **alternative/reference protein pairs coded by the same transcript.**

1192 Pixels show the number of times entries co-occur in reference and alternative proteins.  
1193 Blue pixels indicate that these domains are not shared, white pixels indicate that they are  
1194 shared once, and red that they are shared twice or more.

1195

1196 **Figure 12-figure supplement 2. Reference and alternative proteins share functional**  
1197 **domains.**

1198 The number of reference/alternative protein pairs that share domains (n = 49) is higher

1199 than expected by chance alone ( $p < 0.001$ ). The distribution of expected pairs sharing  
1200 domains and the observed number are shown. This is the same analysis as the one  
1201 presented in figure 12b, with the zinc finger domains taken out.

1202

1203 **Figure 13. AltMiD51<sup>5'</sup> expression induces mitochondrial fission.**

1204 (a) AltMiD51<sup>5'</sup> coding sequence is located in exon 2 of the *MiD51/MIEF1/SMCR7L* gene  
1205 and in the 5'UTR of the canonical mRNA (RefSeq NM\_019008). +2 and +1 indicate  
1206 reading frames. AltMiD51 amino acid sequence is shown with the LYR tripeptide shown  
1207 in bold. Underlined peptides were detected by MS. (b) Human HeLa cells transfected  
1208 with empty vector (mock), a cDNA corresponding to the canonical MiD51 transcript with  
1209 a Flag tag in frame with altMiD51 and an HA tag in frame with MiD51, altMiD51<sup>Flag</sup>  
1210 cDNA or MiD51<sup>HA</sup> cDNA were lysed and analyzed by western blot with antibodies  
1211 against Flag, HA or actin, as indicated. (c) Confocal microscopy of mock-transfected  
1212 cells, cells transfected with altMiD51<sup>WT</sup>, altMiD51<sup>LYR→AAA</sup> or Drp1<sup>K38A</sup> immunostained  
1213 with anti-TOM20 (red channel) and anti-Flag (green channel) monoclonal antibodies. In  
1214 each image, boxed areas are shown at higher magnification in the bottom right corner. %  
1215 of cells with the most frequent morphology is indicated: mock (tubular), altMiD51<sup>WT</sup>  
1216 (fragmented), altMiD51(LYR→AAA) (tubular), Drp1(K38A) (elongated). Scale bar, 10  
1217  $\mu$ m. (d) Bar graphs show mitochondrial morphologies in HeLa cells. Means of three  
1218 independent experiments per condition are shown (100 cells for each independent  
1219 experiment). \*\*\* $p < 0.0005$  (Fisher's exact test) for the three morphologies between  
1220 altMiD51(WT) and the other experimental conditions.

1221

1222 **Figure 13-figure supplement 1. Spectra validation for altMiD51.**

1223 Example of validation for altMiD51 specific peptides YTDRDFYFASIR and  
1224 GLVFLNGK. (a,c) Experimental MS/MS spectra (PeptideShaker graphic interface  
1225 output). (b,d) MS/MS spectra of the synthetic peptides.  
1226 Matching peaks are shown with blue masks. A diagram of the transcript with its accession  
1227 number and the localization of the altORF and the CDS is shown at the top.

1228

1229 **Figure 13-figure supplement 2. MiD51 expression results in mitochondrial fission.**

1230 (a) Confocal microscopy of HeLa cells transfected with MiD51<sup>GFP</sup> immunostained with  
1231 anti-TOM20 (red channel) monoclonal antibodies. In each image, boxed areas are shown  
1232 at higher magnification in the bottom right corner. The localization of MiD51 in fission  
1233 sites is shown in merged higher magnification inset. Scale bar, 10 mm. (b) Human HeLa  
1234 cells transfected with empty vector (mock) or MiD51<sup>GFP</sup> were lysed and analyzed by  
1235 western blot to confirm MiD51<sup>GFP</sup> expression.

1236

1237 **Figure 13-figure supplement 3: AltMiD51 is localized in the mitochondrial matrix.**

1238 Trypan blue quenching experiment performed on HeLa cells stably expressing the  
1239 indicated constructs. The fluorescence remaining after quenching by trypan blue is shown  
1240 relative to Matrix-Venus (Mx-Venus) indicated by the dashed line. (\*\*\*\*  $p < 0,0001$ , one-  
1241 way ANOVA). The absence of quenching of the fluorescence compared to IMS-Venus  
1242 indicates the matricial localization of altMiD51.  $n \geq 3$  cells were quantified per  
1243 experiment, and results are from 6 independent experiments. Data are mean  $\pm$  SEM.

1244

1245 **Figure 13-figure supplement 4. Mitochondrial function parameters.**

1246 (a) Oxygen consumption rates (OCR) in HeLa cells transfected with empty vector (mock)  
1247 or altMiD51<sup>Flag</sup>. Mitochondrial function parameters were assessed in basal conditions  
1248 (basal), in the presence of oligomycin to inhibit the ATP synthase (oxygen consumption  
1249 that is ATP-linked), FCCP to uncouple the mitochondrial inner membrane and allow for  
1250 maximum electron flux through the respiratory chain (maximal OCR), and antimycin  
1251 A/rotenone to inhibit complex III (non-mitochondrial). The balance of the basal OCR  
1252 comprises oxygen consumption due to proton leak and nonmitochondrial sources. The  
1253 mitochondrial reserve capacity (maximal OCR- basal OCR) is an indicator of rapid  
1254 adaptation to stress and metabolic changes. Mean values of replicates are plotted with  
1255 error bars corresponding to the 95% confidence intervals. Statistical significance was  
1256 estimated using a two-way ANOVA with Tukey's post-hoc test (\*\* $p = 0,004$ ). (b) ROS  
1257 production in mock and altMiD51-expressing cells. Cells were untreated, treated with a  
1258 ROS inducer or a ROS inhibitor. Results represent the mean value out of three  
1259 independent experiments, with error bars corresponding to the standard error of the mean  
1260 (s.e.m.). Statistical significance was estimated using unpaired T-test. (c) ATP synthesis  
1261 rate in mock and altMiD51-expressing cells. No significant differences in ATP production  
1262 were observed between mock and altMiD51 transfected cells.  
1263 Results represent the mean of three independent experiments (8 technical replicates  
1264 each). Error bars represent the standard error of the mean. At the end of the experiments,  
1265 cells were collected and proteins analyzed by western blot with antibodies against the  
1266 Flag tag (altMiD51) or actin, as indicated, to verify the expression of altMiD51. A  
1267 representative western blot is shown on the right. Molecular weight markers are shown



1268 on the left (kDa).

1269

1270 **Figure 13-figure supplement 5. Representative confocal images of cells co-expressing**

1271 **altMiD51<sup>GFP</sup> and Drp1(K38A)<sup>HA</sup>.**

1272 (a) Confocal microscopy of HeLa cells co-transfected with altMiD51<sup>GFP</sup> and

1273 Drp1(K38A)<sup>HA</sup> immunostained with anti-TOM20 (blue channel) and anti-HA (red

1274 channel) monoclonal antibodies. In each image, boxed areas are shown at higher

1275 magnification in the bottom right corner. % of cells with the indicated morphology is

1276 indicated on the TOM20 panels. (b) Confocal microscopy of HeLa cells co-transfected

1277 with altMiD51<sup>GFP</sup> and Drp1(wt)<sup>HA</sup> immunostained with anti-TOM20 (blue channel) and

1278 anti-HA (red channel) monoclonal antibodies. In each image, boxed areas are shown at

1279 higher magnification in the bottom right corner. Scale bar, 10 mm.

1280

1281 **Figure 13-figure supplement 6. Protein immunoblot showing the expression of**

1282 **different constructs in HeLa cells.**

1283 HeLa cells were transfected with empty vector (pcDNA3.1), altMiD51(WT)<sup>Flag</sup>,

1284 altMID51(LYR→AAA)<sup>Flag</sup>, Drp1(K38A)<sup>HA</sup>, or Drp1(K38A)<sup>HA</sup> and altMiD51(WT)<sup>Flag</sup>, as

1285 indicated. Proteins were extracted and analyzed by western blot with antibodies against

1286 the Flag tag (altMiD51), the HA tag (Drp1K38A) or actin, as indicated. Molecular weight

1287 markers are shown on the left (kDa). Representative experiment of three independent

1288 biological replicates.

1289

1290 **Figure 14. AltMiD51-induced mitochondrial fragmentation is dependent on Drp1.**

1291 (a) Bar graphs show mitochondrial morphologies in HeLa cells treated with non-target or  
1292 Drp1 siRNAs. Cells were mock-transfected (pcDNA3.1) or transfected with  
1293 altMiD51<sup>Flag</sup>. Means of three independent experiments per condition are shown (100 cells  
1294 for each independent experiment). \*\*\* $p < 0.0005$  (Fisher's exact test) for the three  
1295 morphologies between altMiD51 and the other experimental conditions. (b) HeLa cells  
1296 treated with non-target or Drp1 siRNA were transfected with empty vector (pcDNA3.1)  
1297 or altMiD51<sup>Flag</sup>, as indicated. Proteins were extracted and analyzed by western blot with  
1298 antibodies against the Flag tag (altMiD51), Drp1 or actin, as indicated. (c) Confocal  
1299 microscopy of Drp1 knockdown cells transfected with altMiD51<sup>GFP</sup> immunostained with  
1300 anti-TOM20 (blue channel) and anti-Drp1 (red channel) monoclonal antibodies. In each  
1301 image, boxed areas are shown at higher magnification in the bottom right corner. % of  
1302 cells with the indicated morphology is indicated on the TOM20 panels. Scale bar, 10  $\mu$ m.  
1303 (d) Control Drp1 immunostaining in HeLa cells treated with a non-target siRNA. For (c)  
1304 and (d), laser parameters for Drp1 and TOM20 immunostaining were identical.

1305

1306 **Figure 15. AltDDIT3<sup>5'</sup> co-localizes and interacts with DDIT3.**

1307 (a) AltDDIT3<sup>5'</sup> coding sequence is located in exons 1 and 2 or the  
1308 *DDIT3/CHOP/GADD153* gene and in the 5'UTR of the canonical mRNA (RefSeq  
1309 NM\_004083.5). +2 and +1 indicate reading frames. AltDDIT3 amino acid sequence is  
1310 also shown. (b) Confocal microscopy analyses of HeLa cells co-transfected with  
1311 altDDIT3<sup>GFP</sup> (green channel) and DDIT3<sup>mCherry</sup> (red channel). Scale bar, 10  $\mu$ m. (c, d)  
1312 Colocalization analysis of the images shown in (b) performed using the JACoP plugin  
1313 (Just Another Co-localization Plugin) implemented in Image J software (two independent

1314 biological replicates). (c) Scatterplot representing 50 % of green and red pixel intensities  
1315 showing that altDDIT3<sup>GFP</sup> and DDIT3<sup>mCherry</sup> signal highly correlate (with Pearson  
1316 correlation coefficient of 0.92 ( $p$ -value < 0.0001)). (d) Binary version of the image shown  
1317 in (b) after Costes' automatic threshold. White pixels represent colocalization events ( $p$ -  
1318 value < 0.001, based on 1000 rounds of Costes' randomization colocalization analysis).  
1319 The associated Manders Correlation Coefficient,  $M_1$  and  $M_2$ , are shown in the right upper  
1320 corner.  $M_1$  is the proportion of altDDIT3<sup>GFP</sup> signal overlapping DDIT3<sup>mCherry</sup> signal and  
1321  $M_2$  is the proportion of DDIT3<sup>mCherry</sup> signal overlapping altDDIT3<sup>GFP</sup>. (e) Representative  
1322 immunoblot of co-immunoprecipitation with GFP-Trap agarose beads performed on  
1323 HeLa lysates co-expressing DDIT3<sup>mCherry</sup> and altDDIT3<sup>GFP</sup> or DDIT3<sup>mCherry</sup> with  
1324 pcDNA3.1<sup>GFP</sup> empty vector (two independent experiments).

1325

1326 **Figure 15-figure supplement 1. Protein immunoblot showing the expression of**  
1327 **different constructs in HeLa cells.**

1328 HeLa cells were co-transfected with GFP and mCherry, or altDDIT3<sup>GFP</sup> and  
1329 DDIT3<sup>mCherry</sup>, as indicated. Proteins were extracted and analyzed by western blot with  
1330 antibodies, as indicated. Molecular weight markers are shown on the left (kDa).  
1331 AltDDIT3 has a predicted molecular weight of 4.28 kDa and thus migrates at its expected  
1332 molecular weight when tagged with GFP (~32 kDa). Representative experiment of two  
1333 independent biological replicates.

1334

1335 **Figure 15-figure supplement 2. Colocalization of altDDIT3 with DDIT3.**

1336 Scatter plots of Pearson's Correlation Coefficient and Manders' Correlation Coefficient

1337 after Costes' automatic threshold ( $p$ -value < 0.001, based on 1000 rounds of Costes'  
1338 randomization colocalization analysis). M1 is the proportion of altDDIT3<sup>GFP</sup> signal  
1339 overlapping DDIT3<sup>mCherry</sup> signal and M2 is the proportion of DDIT3<sup>mCherry</sup> signal  
1340 overlapping altDDIT3<sup>GFP</sup>. Error bars represent the mean +/- SD of three independent  
1341 experiments (28 cells).

1342 **SUPPLEMENTARY FILES**

1343

1344 **Supplementary file 1: 12,616 alternative proteins and 26,531 reference proteins with**  
1345 **translation initiation sites detected by ribosome profiling after re-analysis of large**  
1346 **scale studies. Sheet 1: general information.** Sheet 2: list of alternative proteins; sheet 3:  
1347 pie chart of corresponding altORFs localization. Sheet 4: Sheet 2: list of reference  
1348 proteins

1349

1350 **Supplementary file 2: 4,872 alternative proteins detected by mass spectrometry**  
1351 **(MS) after re-analysis of large proteomic studies.** Sheet 1: MS identification  
1352 parameters; sheet 2: raw MS output; sheet 3: list of detected alternative proteins; sheet 4:  
1353 pie chart of corresponding altORFs localization.

1354

1355 **Supplementary file 3: list of phosphopeptides.**

1356

1357 **Supplementary file 4: linker sequences separating adjacent zinc finger motifs.**

1358

1359 **Supplementary file 5: 383 alternative proteins detected by mass spectrometry in the**  
1360 **interactome of 118 zinc finger proteins.** Sheet 1: MS identification parameters; sheet 2:  
1361 raw MS output; sheet 3: list of detected alternative proteins.

1362

1363 **Supplementary file 6: high-confidence list of predicted functional and co-operating**  
1364 **alternative proteins based on co-conservation and expression analyses.** Sheet 1: high

1365 confidence list in mammals; sheet 2: high confidence list in in vertebrates.

# 1 Table 1: AltORFs and alternative protein annotations in different organisms

2

| Genomes                                                      | Features    |                     |                     |          |                                                     |                      |
|--------------------------------------------------------------|-------------|---------------------|---------------------|----------|-----------------------------------------------------|----------------------|
|                                                              | Transcripts |                     | Current annotations |          | Annotations of alternative protein coding sequences |                      |
|                                                              | mRNAs       | Others <sup>1</sup> | CDSs                | Proteins | altORFs                                             | Alternative proteins |
| <i>H. sapiens</i> GRCh38<br>RefSeq<br>GCF_000001405.26       | 67,765      | 11,755              | 68,264              | 54,498   | 539,134                                             | 183,191              |
| <i>P. troglodytes</i> 2.1.4<br>RefSeq<br>GCF_000001515.6     | 55,034      | 7,527               | 55,243              | 41,774   | 416,515                                             | 161,663              |
| <i>M. musculus</i> GRCm38p2,<br>RefSeq<br>GCF_000001635.22   | 73,450      | 18,886              | 73,551              | 53,573   | 642,203                                             | 215,472              |
| <i>B. Taurus</i> UMD3.1.86                                   | 22,089      | 838                 | 22,089              | 21,915   | 79,906                                              | 73,603               |
| <i>X. tropicalis</i> Ensembl<br>JGI_4.2                      | 28,462      | 4,644               | 28,462              | 22,614   | 141,894                                             | 69,917               |
| <i>D rerio</i><br>Ensembl ZV10.84                            | 44,198      | 8,196               | 44,198              | 41,460   | 214,628                                             | 150,510              |
| <i>D. melanogaster</i><br>RefSeq<br>GCA_000705575.1          | 30,255      | 3,474               | 30,715              | 20,995   | 174,771                                             | 71,705               |
| <i>C. elegans</i> WBcel235,<br>RefSeq<br>GCF_000002985.6     | 28,653      | 25,256              | 26,458              | 25,750   | 131,830                                             | 45,603               |
| <i>S. cerevisiae</i> YJM993_v1,<br>RefSeq<br>GCA_000662435.1 | 5,471       | 1,463               | 5,463               | 5,423    | 12,401                                              | 9,492                |

3 <sup>1</sup>Other transcripts include miRNAs, rRNAs, ncRNAs, snRNAs, snoRNAs, tRNAs. <sup>2</sup>Annotated retained-intron and processed transcripts were  
4 classified as mRNAs.

5

6

1 **Table 2: orthology and co-conservation assessment of alternative-reference protein pairs between *H. sapiens* and other species**

|                        | A                                       | B                    | C                                  | D                        | E                                                         | F                     | G                                 | H                                                                   | I                                                               | J                   |
|------------------------|-----------------------------------------|----------------------|------------------------------------|--------------------------|-----------------------------------------------------------|-----------------------|-----------------------------------|---------------------------------------------------------------------|-----------------------------------------------------------------|---------------------|
|                        |                                         |                      |                                    |                          |                                                           | Observed              | Mean expected                     |                                                                     | Max expected                                                    |                     |
|                        | Orthologous altProts (of 183,191 total) | Orthologous refProts | Co-conserved altProt-refProt pairs | Non-orthologous altProts | Non-orthologous altProts paired with orthologous refProts | Co-conservation (C/A) | % orthologous refProts (B/54,498) | % non-orthologous altProts paired with an orthologous refProt (E/D) | Max % of 1 million binomial simulations, $p=\max(G, H)$ , $n=A$ | Inferred $p$ -value |
| <i>P. troglodytes</i>  | 113,687                                 | 25,755               | 100,839                            | 69,504                   | 30,772                                                    | 88.69                 | 47.20                             | 44.27                                                               | 50.39                                                           | <1e-06              |
| <i>M. musculus</i>     | 25,930                                  | 22,304               | 24,862                             | 157,261                  | 106,987                                                   | 95.88                 | 40.09                             | 68.031                                                              | 69.39                                                           | <1e-06              |
| <i>B. taurus</i>       | 25,868                                  | 16,887               | 24,426                             | 157,323                  | 99,369                                                    | 94.42                 | 30.98                             | 63.16                                                               | 64.67                                                           | <1e-06              |
| <i>X. tropicalis</i>   | 2,470                                   | 12,458               | 1,974                              | 180,721                  | 95,499                                                    | 79.91                 | 22.85                             | 52.84                                                               | 57.81                                                           | <1e-06              |
| <i>D. rerio</i>        | 2,023                                   | 12,791               | 1,203                              | 181,168                  | 94,426                                                    | 59.46                 | 23.47                             | 52.12                                                               | 57.29                                                           | <1e-06              |
| <i>D. melanogaster</i> | 115                                     | 4,881                | 51                                 | 183,076                  | 34,352                                                    | 44.34                 | 8.95                              | 18.76                                                               | 38.26                                                           | <1e-06              |
| <i>C. elegans</i>      | 34                                      | 3,954                | 8                                  | 183,157                  | 26,839                                                    | 23.52                 | 7.25                              | 14.65                                                               | 50.00                                                           | 0.02                |
| <i>S. cerevisiae</i>   | 6                                       | 1,854                | 2                                  | 183,185                  | 10,935                                                    | 33.33                 | 3.40                              | 5.96                                                                | 83.33                                                           | 0.04                |

2 In order to compare the observed co-conservation to expected co-conservation, we used the more conservative of two expected values: either the percentage of all refProts (called here reference proteins)  
3 that were defined as orthologous (column G), or the percentage of non-orthologous altProts (called here alternative proteins) that were paired with an orthologous refProt. Both of these methods are  
4 themselves conservative, as they do not account for the conservation of the pairing. The larger of these values for each species was then used to generate 1 million random binomial distributions with  
5  $n=\#$  of orthologous altProts; the maximum of these percentages is reported in column I.



1 | **Table 3: alternative zinc finger proteins detected by mass spectrometry (MS) and ribosome**  
 2 | **profiling (RP)**

Formatted: Numbering: Continuous

| Alternative protein accession | Detection method <sup>1</sup> | Gene    | Amino acid sequence                                                                                                                                                                                                                                                                                                              | AltORF localization |
|-------------------------------|-------------------------------|---------|----------------------------------------------------------------------------------------------------------------------------------------------------------------------------------------------------------------------------------------------------------------------------------------------------------------------------------|---------------------|
| IP_238718.1                   | MS                            | RP11    | MLVEVACSSCRSLHLKAGASEDGAALPAHTGGKENGATT                                                                                                                                                                                                                                                                                          | nc                  |
| IP_278905.1                   | RP                            | ZNF761  | MSVARPLVGSHLYAIDFILERNLISVMSVARTLVRSHPLYATIDFILERNLTSVMSVARPLVRSQTLHAIVDFILEKNCNECGEVFNQQAHLAGHHRHTGKGP                                                                                                                                                                                                                          | CDS                 |
| IP_278745.1                   | MS and RP                     | ZNF816  | MSVARPSVRNHPFNAIYFTLERNLTVNKNVMTMFTFADHTLKDIGRFLERDHTNVRVTRFSGVIHTLQNIREFILERNHTSVINVAGVSVGSHPFNTIIHFTLERNLTHVMNVARFLVEEKTLLHVIIDFMLERNLTVNKNVTKFSVADHTLKDIGEFILGKNHTNVRVFTRLSGVIHALQTIREFILERNLTSVINVRRFLIKKESLHNIREFILERNLTSVMNVARFLIKKQALQNIREFILQRNLTSVMSVAKPLLDSQHLFTIKQSMGVGKLYKCNDCCHKVFSNATTIANHYRIHIERSTSVINVANFSDVIHNL | CDS                 |
| IP_138289.1                   | MS                            | ZSCAN31 | MNIGGATLERNPNINVRVSGKPSVPAMASLDTEESTQGGKNHMANAKCVGRLLSSAHALFSIRGYTLERSAISVSVAKPSFRMQGFSSISESTLVRNPISAVSAVNSLVSGHFLRNIRKSTLERDHLKGFDFGAFSHHCNLRHFRIHTVPAELD                                                                                                                                                                       | CDS                 |
| IP_278564.1                   | MS                            | ZNF808  | MIVTKSSVTLQQLQIHGESMMKRNLSSVINVACFSDIVHTLQFIGNLILERNLTVNMIARSSVKLHPMQNRRHTGKPKHCDDCGKAFTHSHSLVGHQRIHTGQKCKCHQCGKVFSPRSLAEHEKIH                                                                                                                                                                                                   | 3'UTR               |
| IP_275012.1                   | MS                            | ZNF780A | MKPCECTECGKTFSCSSNIVQHVKIHTGKRYNVRNMGKHLWMSCLNIRKFRIVRNFVTRISVDKPSLCTKNLLNTRILMRNLVNIKECVKNFHHGLGFAQLLSIHTSEKLSVRNVGRFIATLNTLEFGEDNSCEKVF                                                                                                                                                                                        | 3'UTR               |
| IP_270595.1 <sup>2</sup>      | MS                            | ZNF440  | MHSVERPYKCKICGRGFYSAKSFQIHEKSYTGKPYECKQCGKAFVSFTSFRYHERHTHTGENPYECKQFGKAFRSVKNLRFHKTHTGKPECKKCRKAFHNFSSLQIHERMHRGEKLECKHCGKAFISAKIL                                                                                                                                                                                              | CDS                 |
| IP_270643.1 <sup>2</sup>      | MS                            | ZNF763  | MKKLTLERNPINACHVVKPSIFVPFSIMKGLTLERNPMSVSGKPSDVPHTFEGMVGLTGKPYECKEKGKAFRSASHLQIHERTQTHIRIHSGERPYKCKTCGKGFYSPTSFQRHEKHTHTAEKPYECKQCGKAFSSSSFWYHERHTHTGKPYECKQCGKAFRSASIQMHAGTHPEEKPYECKQCGKAFRSAPHLRIHGRHTHTGKPYECKQCGKAFRSKLNRIHERTQTHVVMHSVERPYKCKICGKGFYSAKSFQIPEKSYTGKPYECKQCGKAFISFTSFR                                      | 3'UTR               |
| IP_270597.1 <sup>3</sup>      | MS                            | ZNF440  | MKNLTLERNPMSVSNVKGKPLFPLPFDIMKGLTLERTPMSVNLGKPSDLSKIFDFIKGHTLERNPNVNRNVEKHSIISLLCKYMKGCTEERSSVNSIVGKHSYLPFSFEYMQEHTMERNPMNVKNAEKHSACLFPIDMKRLTLEGNMTNANVAKLSLLPVLFNIMKEHTREKPYQCKQCAKAFISSTSFQYHERTHMGEKPYECMPSGKAFISSSSLQYHERHTHTGKPYEYKQCGKAFRSASHLQMHGRHTHTGKPYECKQYKAFRDPKIL                                                 | 3'UTR               |
| IP_270609.1 <sup>3</sup>      | MS                            | ZNF439  | MNVSNVAKAFTSSSSFYHERHTHTGKPYQCKQCGKAVRSASRLQMHGSTHTWQKLYECKQYKAFRSARIL                                                                                                                                                                                                                                                           | 3'UTR               |
| IP_270663.1 <sup>3</sup>      | MS                            | ZNF844  | MHGRHTHTQEKPYECKQCGKAFIFSTSFYHERHTHTGKPYECKQCGKAFRSATQLQMRKIHTGKPYECKQCGKAYRSVSQLVHERHTHTVEQPYEYKQYKAFRAKLNLIQITMNVNN                                                                                                                                                                                                            | CDS                 |
| IP_270665.1 <sup>3</sup>      | MS                            | ZNF844  | MHRKIHTGKPYECKQCGKAYRSVSQLVHERHTHTVEQPYEYKQYKAFRAKLNLIQITMNVNN                                                                                                                                                                                                                                                                   | CDS                 |
| IP_270668.1 <sup>3</sup>      | MS                            | ZNF844  | MSSTAFQYHEKHTHTREKHYECKQCGKAFISSGSLRYHERHTHTGKPYECKQCGKAFRSATQLQMRKIHTGKPYECKQCGKAYRSVSQLVHERHTHTVEQPYEYKQYKAFRAKLNLIQITMNVNN                                                                                                                                                                                                    | 3'UTR               |

|             |    |                 | VNN                                                                                                                                                                                                                                                                                                                                                                                                                                                                                                                                                                                           |              |
|-------------|----|-----------------|-----------------------------------------------------------------------------------------------------------------------------------------------------------------------------------------------------------------------------------------------------------------------------------------------------------------------------------------------------------------------------------------------------------------------------------------------------------------------------------------------------------------------------------------------------------------------------------------------|--------------|
| IP_138139.1 | MS | ZNF322          | MLSPSRCKRIHTGEQLFKCLQCQLCCRQYEHLLIGPQKTHPGE<br>KPQQV                                                                                                                                                                                                                                                                                                                                                                                                                                                                                                                                          | 3'UTR        |
| IP_204754.1 | RP | ZFP91-<br>CNTF  | MPGETEPRPPEQDQEGGEEAKAAPEEPQORPPEAVAAAPA<br>GTTSSRVLRGGRDRGRAAAAAAAAAAVSRRRKAEPYRRRRSS<br>PSARPPDVPQQPQAAKSPSPVQGGKSPRLLCIEKVTTDKDPK<br>EEKEEEDDSALPQEVSIASRPSRGWRSSRTSVSRHRDTENTR<br>SSRSKTGSLQLICKSEPNTDQLDYDVGEEHQSPGGISSEEEEE<br>EEEMLISEEEIPFKDDPRDETYKPHLERETPKPRRKSQKVKKEE<br>KEKKEIKVEVEVEVKEEENEIREDEEPPRRKRGRRRKDDKSPRL<br>PKRRKPPPIQYVRCMEGCGTVLAHPRYLQHIIKQYHLLKK<br>KYVCPHPSCGRLFRLQKQLRHAKHHTDQRDYICEYCARAF<br>KSSHNLAVHRMIHTGEKPLQCEICGFTCRQKASLNWHMKKH<br>DADSFYQFSCNICGKKEFKKDSVVAKKAKSHPEVLIAEALAA<br>NAGALITSTDILGTNPESLTQPSDGGQLPLLEPLGNSTSGECL<br>LLEAEGMSKSYCSGTERSIIHR | nc           |
| IP_098649.1 | RP | INO80B-<br>WBP1 | MSKLWRRGSTSGAMEAPEPGEALELSLAGAHGHGVHKKKH<br>KKHKKKKKKHHQEEDAGPTQPSAKPQLKLIKLGQVVLG<br>TKSVPTFTVIPEGPRSPPLMVVDNEEPMEGVPLEQYRAWL<br>DEDSNLSPSPLRDLSSGLGGQEEEEQRWLDALEKGELDDNG<br>DLKKEINERLLTARQRALLQKARSQSPMLPLPVAEGCPPAL<br>TEEMLLKREERARKRRLQAARRAEHKNQTIERLTKTAATSG<br>RGGRRGARGERRGRAAAPMVRYCSGAQGSTLSFPPGVP<br>APTAVSQRPSGPPRCSVPGCPHPRRYACSRGTQALCSLQC<br>YRINLQMRLGGPEGPGSPLLATFESCAQE                                                                                                                                                                                                  | nc           |
| IP_115174.1 | RP | ZNF721          | MYIGEFILERNPHTVENVAKPLDSLQIFMRIRKFILERNPTVE<br>TVAKPLDSLQIFMHIRKFILEIKPYKCKEKGAFKSYYSILKHK<br>RTHTRGMSYEGDECRGL                                                                                                                                                                                                                                                                                                                                                                                                                                                                               | CDS          |
| IP_275016.1 | RP | ZNF780<br>A     | MNVRSVGGKALIVVHTLFSIRKFIIPMRNLLYVGNVRWPLDIAN<br>LLNILEFILVTSHLNVKTVGRPSIVAQALFNIRVFTLVRSPMNV<br>RSVGRLLDFTYNFNIRKLTQVKNHLNVRNVGNSFVVQILI<br>NIEVFILERNPLNVRNVGKPFDFICTLFDIRNCILVRNPLNVR<br>VGKPFDFICNLDIRNCILVRNPLNVRNVERFLVFPPLAIRTF<br>TQVRRHLECKEKGKSFNRVSNHVQHQSIRAGVKPECKKCGG<br>KGFICGSNVIQHQKHSSEKLFVCKEWRITFRYHYHLFNITKF<br>TLVKNPLNVKNVERPSVF                                                                                                                                                                                                                                        | CDS or 3'UTR |
| IP_278870.1 | RP | ZNF845          | MNVARFLIEKQNLHVIIEFILERNIRNMKNVTKFTVNVQVLKD<br>RRIHTGEKAYKCKSL                                                                                                                                                                                                                                                                                                                                                                                                                                                                                                                                | CDS          |
| IP_278888.1 | RP | ZNF765          | MSVARPSAGRHLHTIIDFILDRNLTNVKIVMKLSVSNQTLKD<br>IGEFILERNYTCNECGKTFNQELTLCHRRRLHSGEKPYKYEEL<br>DKAYNFKSNLEIHQKIRTEENLTSVMMSVARP                                                                                                                                                                                                                                                                                                                                                                                                                                                                 | CDS          |
| IP_278918.1 | RP | ZNF813          | MNVARVLIGKHTLHVIIDFILERNLTSVMNVARFLIEKHTLHIII<br>DFILEINLTSVMNVARFLIKHTLHVITDFILERNLTSVMNVAR<br>FLIKKQTLHVIIDFILERNLTSLSMVAKLLIEKQSLHIIIQFILER<br>NKCNECGKTFCHNSVLVIHKNSYWRETSVMNVAKFLINKHT<br>FHVIIDFIVERNLNRNVKHVTKFTVANRASKDRRIHTGEKAYK<br>GEEYHRVFSHKSNLERHKINHATAEKP                                                                                                                                                                                                                                                                                                                     | CDS          |
| IP_280349.1 | RP | ZNF587          | MNAVNVGNHFFPALRFMFIKEFILDKSLISAVNVENPFLNVPV<br>SLNTGEFTLEKGLMNAPNVEKHFSEALPSFIIRVHTGERPYEC<br>SEYGKSFSAEASRLVKHRRVHTGERPYECCQCGKHQNVCCPR<br>S                                                                                                                                                                                                                                                                                                                                                                                                                                                 | CDS          |
| IP_280385.1 | RP | ZNF417          | MNAMNVGNHFFPALRFMFIKEFILDKSLISAVNVENPLLNV<br>VSLNTGEFTLEKGLMNVPNVEKHFSEALPSFIIRVHTGERPYE<br>CSEYGKSFSAETSRLIKHRRVHTGERPYECCQSGKHQNVCSPW<br>S                                                                                                                                                                                                                                                                                                                                                                                                                                                  | CDS          |

3

4 <sup>1</sup>MS, mass spectrometry; RP, ribosome profiling.

5 <sup>2</sup> These two proteins were not detected with unique peptides but with shared peptides. One protein only was counted in subsequent  
6 analyses.

7 <sup>3</sup> These five proteins were not detected with unique peptides but with shared peptides. One protein only was counted in subsequent  
8 analyses.

1 **Table 4: Examples of proteins encoded in the same gene and functionally interacting**

| Gene           | Polypeptides <sup>1</sup>                                                                      | Reference | altORF localization | altORF size aa | Conservation                  | Summary of functional relationship with the annotated protein                                             |
|----------------|------------------------------------------------------------------------------------------------|-----------|---------------------|----------------|-------------------------------|-----------------------------------------------------------------------------------------------------------|
| CDKN2A, INK4   | Cyclin-dependent kinase inhibitor 2A or p16-INK4 (P42771), and p19ARF (Q8N726)                 | (61)      | 5'UTR               | 169            | Unknown                       | the unitary inheritance of p16INK4a and p19ARF may underlie their dual requirement in cell cycle control. |
| GNAS, XLalphas | Guanine nucleotide-binding protein G(s) subunit alpha isoforms XL□s (Q5JWF2) and Alex (P84996) | (62)      | 5'UTR               | +700           | Human, mouse, rat             | Both subunits transduce receptor signals into stimulation of adenylyl cyclase.                            |
| ATXN1          | Ataxin-1 (P54253) and altAtaxin-1                                                              | (63)      | CDS                 | 185            | Unknown                       | Direct interaction                                                                                        |
| Adora2A        | A2A adenosine receptor (P30543) and uORF5                                                      | (64)      | 5'UTR               | 134            | Human, chimpanzee, rat, mouse | A2AR stimulation increases the level of the uORF5 protein via post-transcriptional regulation.            |

|       |                                                            |      |       |   |                                                       |                                                                                                                                                                           |
|-------|------------------------------------------------------------|------|-------|---|-------------------------------------------------------|---------------------------------------------------------------------------------------------------------------------------------------------------------------------------|
| AGTR1 | Angiotensin<br>type 1a<br>receptor<br>(P25095) and<br>PEP7 | (65) | 5'UTR | 7 | Highly<br>conserved<br>across<br>mammalian<br>species | Inhibits non-G<br>protein-coupled<br>signalling of<br>angiotensin II,<br>without altering<br>the classical G<br>protein-coupled<br>pathway<br>activated by the<br>ligand. |
|-------|------------------------------------------------------------|------|-------|---|-------------------------------------------------------|---------------------------------------------------------------------------------------------------------------------------------------------------------------------------|

---

2 <sup>1</sup>The UniProtKB accession is indicated when available.

Figure 1

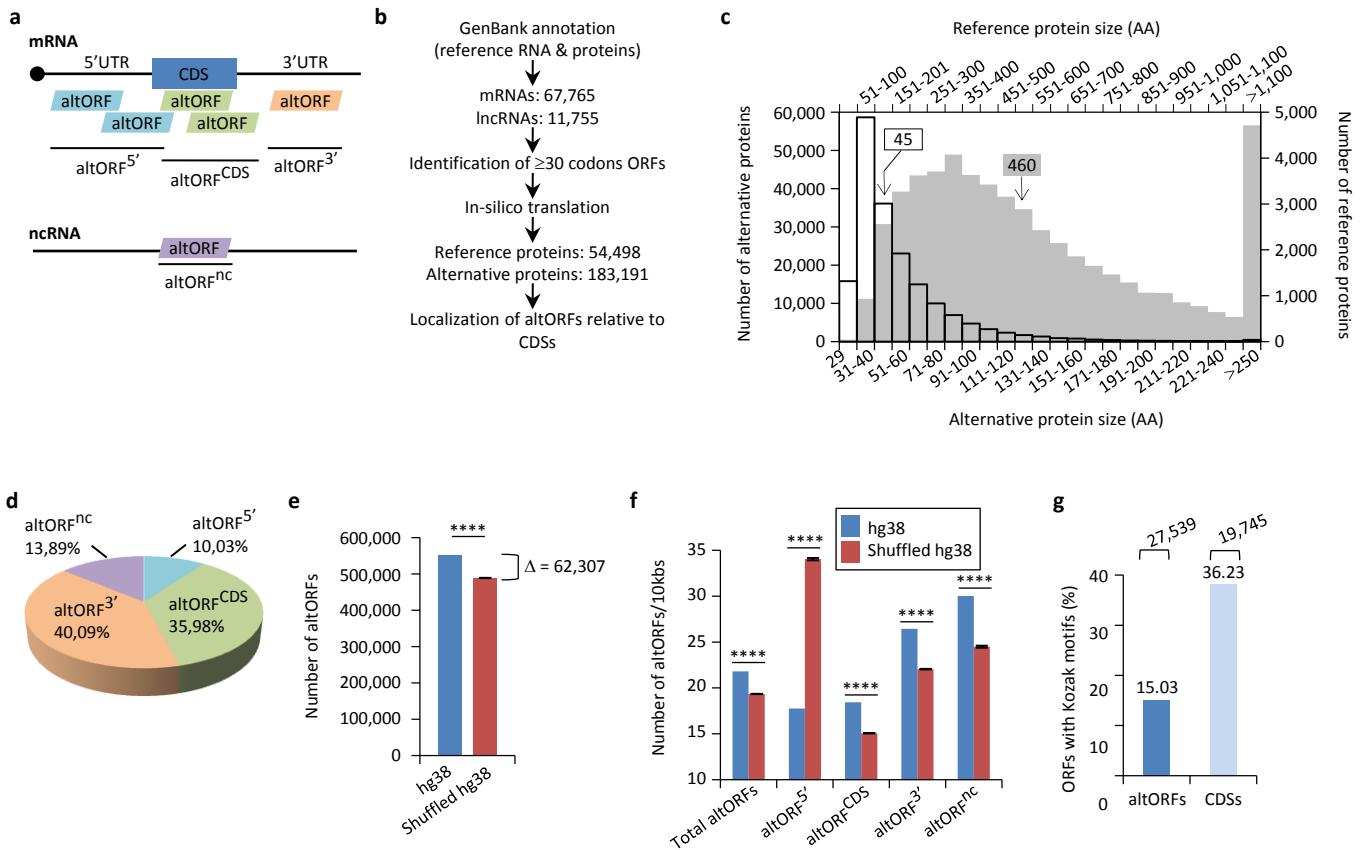

**Figure 1. Annotation of human altORFs.**

(a) AltORF nomenclature. AltORFs partially overlapping the CDS must be in a different reading frame. (b) Pipeline for the identification of altORFs. (c) Size distribution of alternative (empty bars, vertical and horizontal axes) and reference (grey bars, secondary horizontal and vertical axes) proteins. Arrows indicate the median size. The median alternative protein length is 45 amino acids (AA) compared to 460 for the reference proteins. (d) Distribution of altORFs in the human hg38 transcriptome. (e, f) Number of total altORFs (e) or number of altORFs/10kbs (f) in hg38 compared to shuffled hg38. Means and standard deviations for 100 replicates obtained by sequence shuffling are shown. Statistical significance was determined by using one sample t-test with two-tailed  $p$ -values. \*\*\*\*  $p < 0.0001$ . (g) Percentage of altORFs with an optimal Kozak motif. The total number of altORFs with an optimal Kozak motif is also indicated at the top.

**a**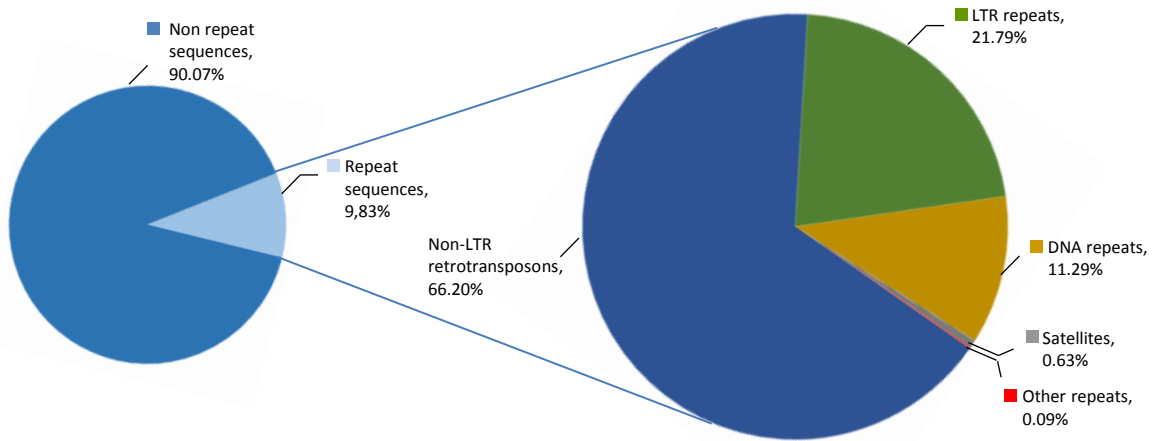**b**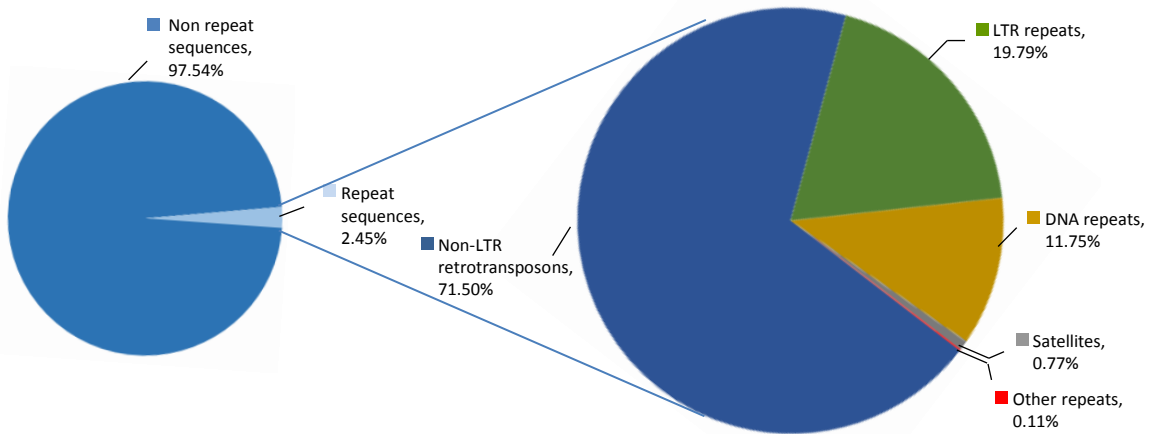

**Figure 1-figure supplement 1: 10% of altORFs are present in different classes of repeats.**

While more than half of the human genome is composed of repeated sequences, only 9.83% or 18,003 altORFs are located inside these repeats (**a**), compared to 2.45% or 1,677 CDSs (**b**). AltORFs and CDSs are detected in non-LTR retrotransposons (LINEs, SINEs, SINE-VNTR-Alus), LTR repeats, DNA repeats, satellites and other repeats. Proportions were determined using RepeatMasker (version 3.3.0).

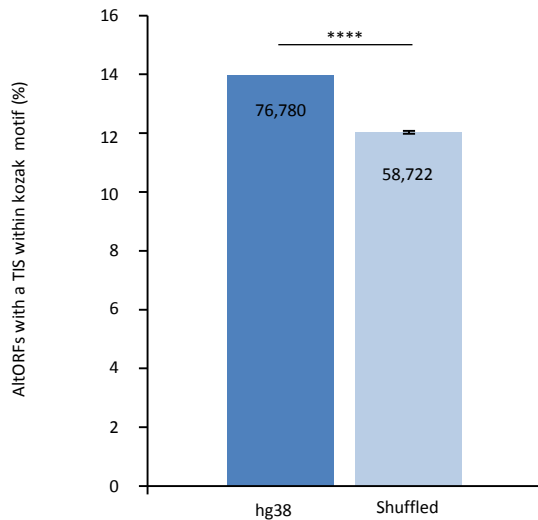

**Figure 1-figure supplement 2: The proportion of altORFs with a translation initiation site (TIS) with a Kozak motif in hg38 is significantly different from 100 shuffled hg38 transcriptomes.**

Percentage of altORFs with a TIS within an optimal Kozak sequence in hg38 (dark blue) compared to 100 shuffled hg38 (light blue). Mean and standard deviations for sequence shuffling are displayed, and significant difference was defined by using one sample t test. \*\*\*\*  $P < 0.0001$ . Note that shuffling all transcripts in the hg38 transcriptome generates a total of 489,073 altORFs on average, compared to 539,134 altORFs in hg38. Most transcripts result from alternative splicing and there are 183,191 unique altORFs in the hg38 transcriptome, while the 489,073 altORFs in shuffled transcriptomes are all unique. Figure 1g shows the percentage of unique altORFs with a kozak motif (15%), while the current Fig. shows the percentage of altORFs with a kozak motif relative to the total number of altORFs (14%).



Figure 2

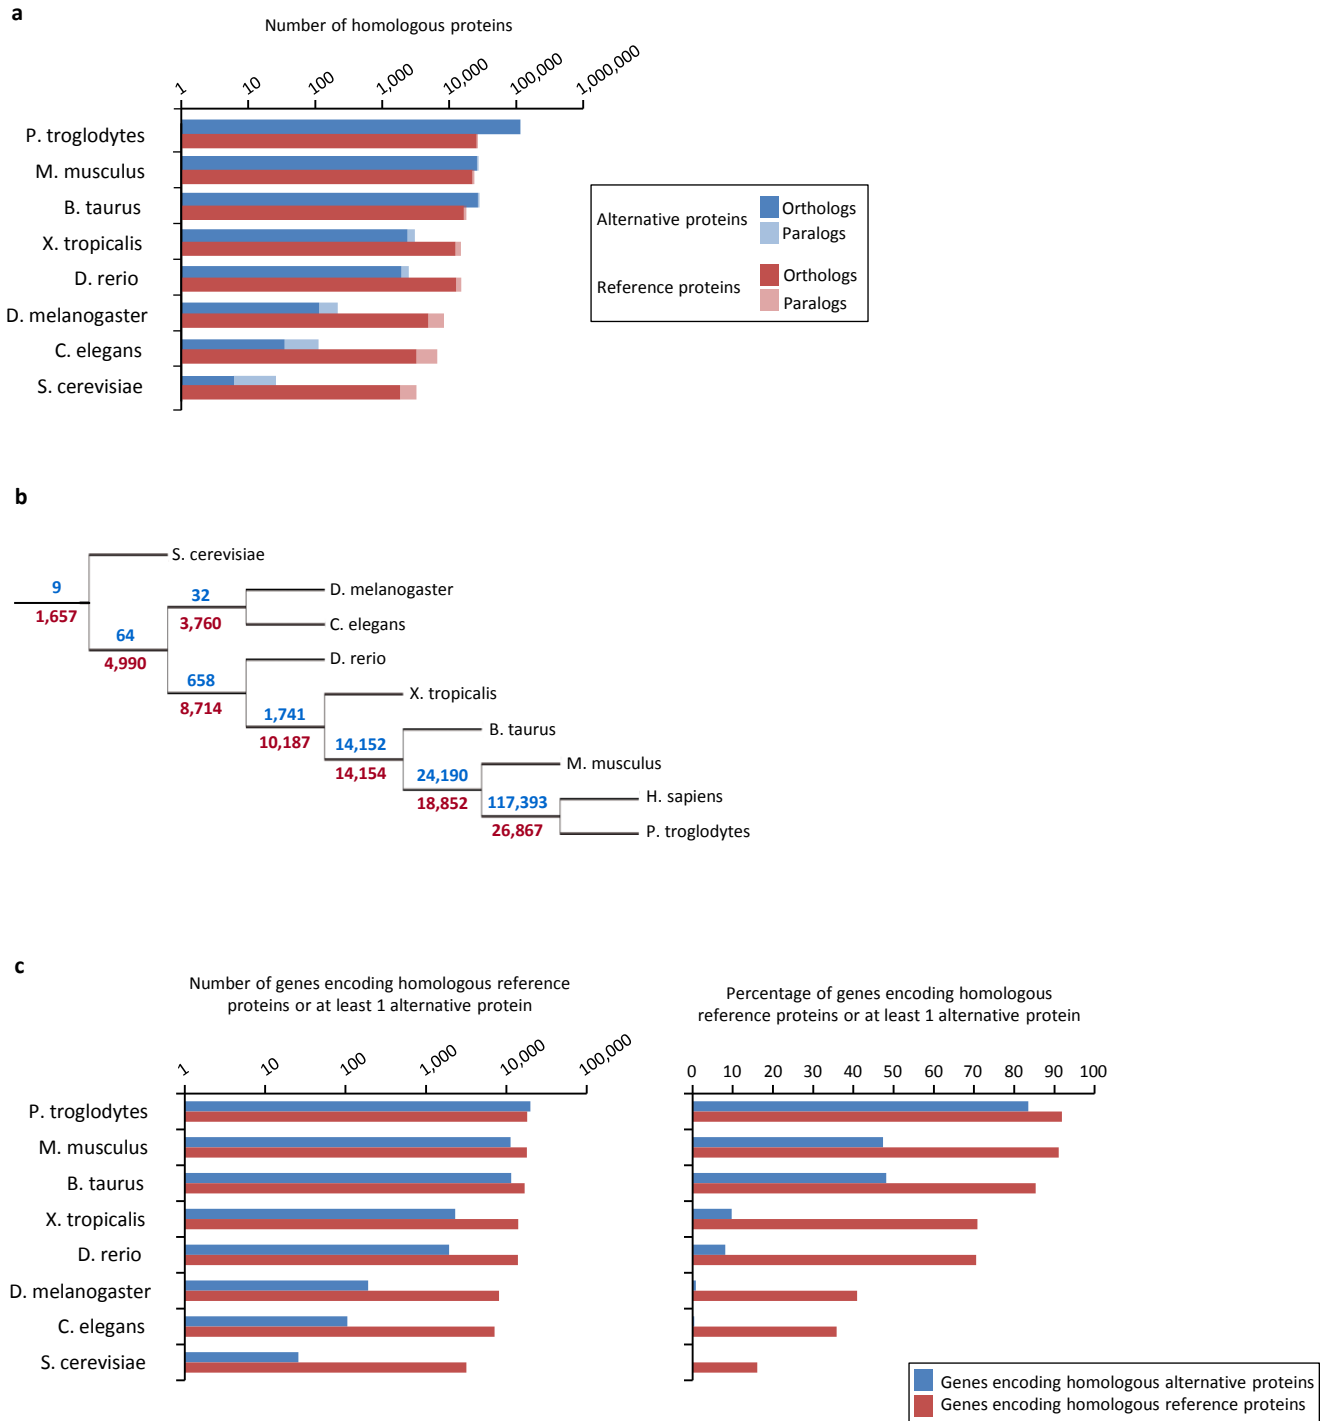

**Figure 2. Conservation of alternative and reference proteins across different species.**

(a) Number of orthologous and paralogous alternative and reference proteins between *H. sapiens* and other species (pairwise study). (b) Phylogenetic tree: conservation of alternative (blue) and reference (red) proteins across various eukaryotic species. (c) Number and fraction of genes encoding homologous reference proteins or at least 1 homologous alternative protein between *H. sapiens* and other species (pairwise study).

Figure 3

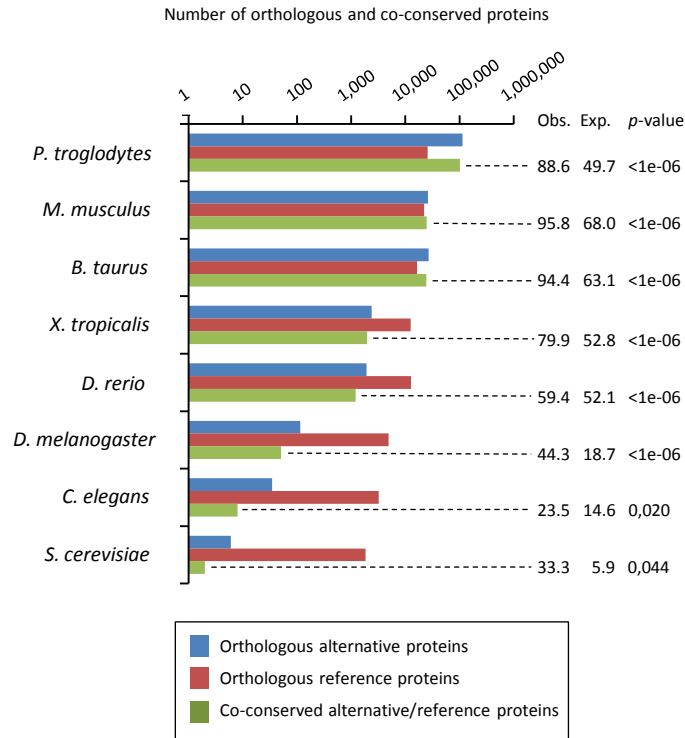

**Figure 3. Number of orthologous and co-conserved alternative and reference proteins between *H. sapiens* and other species (pairwise).** For the co-conservation analyses, the percentage of observed (Obs.), expected (Exp.) and corresponding *p*-values relative to the total number of reference-alternative protein pairs are indicated on the right (see Table 2 for details).

Figure 4

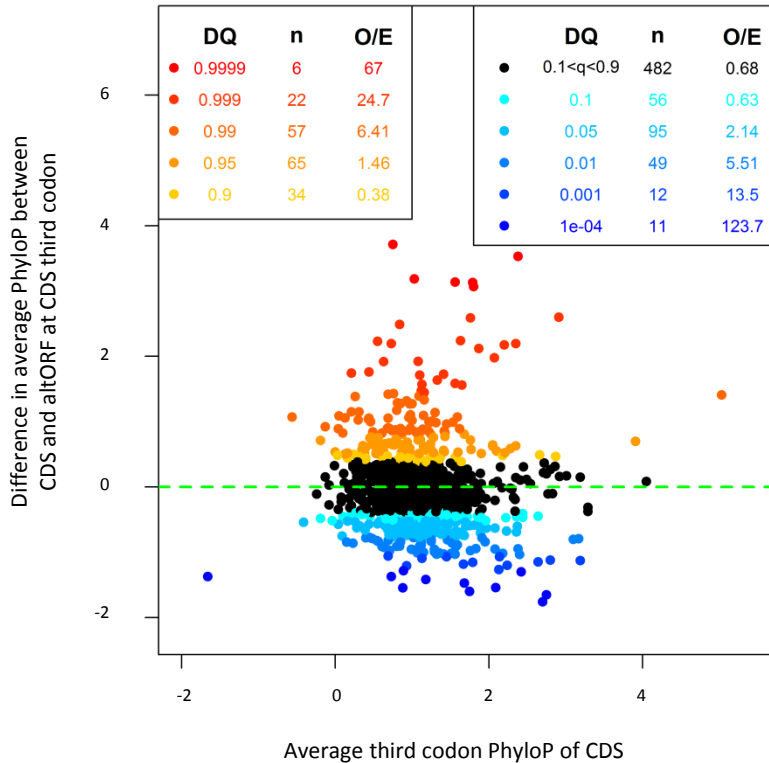

**Figure 4. AltORFs completely nested within CDSs show more extreme PhyloP values (more conserved or faster evolving) than their CDSs.** Differences between altORF and CDS PhyloP scores (altORF PhyloP – CDS PhyloP, y-axis) are plotted against PhyloPs for their respective CDSs (x-axis). We restricted the analysis to altORF-CDS pairs that were co-conserved from humans to zebrafish. The plot contains 889 CDSs containing at least one fully nested altORF, paired with one of its altORFs selected at random (to avoid problems with statistical non-independence). PhyloPs for both altORFs and CDSs are based on 3rd codons in the CDS reading frame, calculated across 100 vertebrate species. We compared these differences to those generated based on five random regions in CDSs with a similar length as altORFs. Expected quantiles of the differences (“DQ” columns) were identified and compared to the observed differences. We show the absolute numbers (“n”) and observed-to-expected ratios (“O/E”) for each quantile. There are clearly substantial over-representations of extreme values (red signaling conservation DQ 0.95, and blue signaling accelerated evolution DQ 0.05) with 317 of 889 altORFs (35.7%). A random distribution would have implied a total of 10% (or 89) of altORFs in the extreme values. This suggests that 25.7% (35.7%-10%) of these 889 altORFs undergo specific selection different from random regions in their CDSs with a similar length distribution. This percentage is very similar to the 26.2% obtained from an analysis of altORFs without restriction based on co-conservation in vertebrates (see Figure 4-figure supplement 1), a total which would imply that there are about 4,458 altORFs fully nested in CDSs undergoing conserved or accelerated evolution relative to their CDSs.

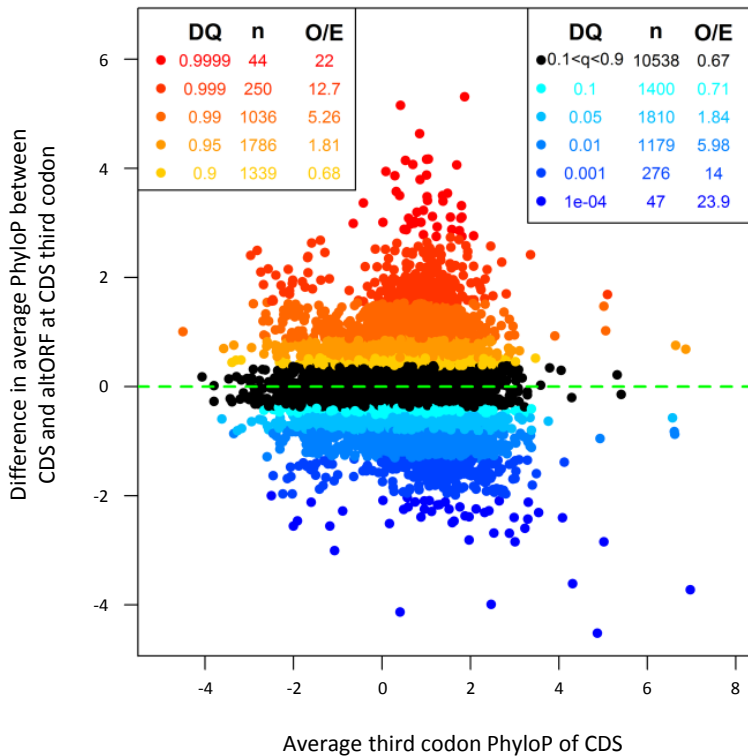

**Figure 4-figure supplement 1. AltORFs completely nested within CDSs show more extreme PhyloP values (more conserved or faster evolving) than their CDSs.** Differences between altORF and CDS PhyloP scores (altORF PhyloP – CDS PhyloP, y-axis) are plotted against PhyloPs for their respective CDSs (x-axis). The plot contains all 20,814 CDSs containing at least one fully nested altORF, paired with one of its altORFs selected at random (to avoid problems with statistical non-independence). PhyloPs for both altORFs and CDSs are based on third codon positions in the CDS reading frame, calculated across 100 vertebrate species. We compared these differences to those generated based on five random regions in CDSs with a similar length as altORFs. Expected quantiles of the differences (“DQ” columns) were identified and compared to the observed differences. We show the absolute numbers (“n”) and observed-to-expected ratios (“O/E”) for each quantile. There are clearly substantial over-representations of extreme values (red signalling conservation  $DQ \geq 0.95$ , and blue signalling accelerated evolution  $DQ \leq 0.05$ ) with 6,428 of 19,705 altORFs (36.2%). A random distribution would have implied a total of 10% (or 1,970) of altORFs in the extreme values. This suggests that 26.2% (36.2%-10%) of altORFs (or 4,458) undergo specific selection different from random regions in their CDSs with a similar length distribution.

Figure 5

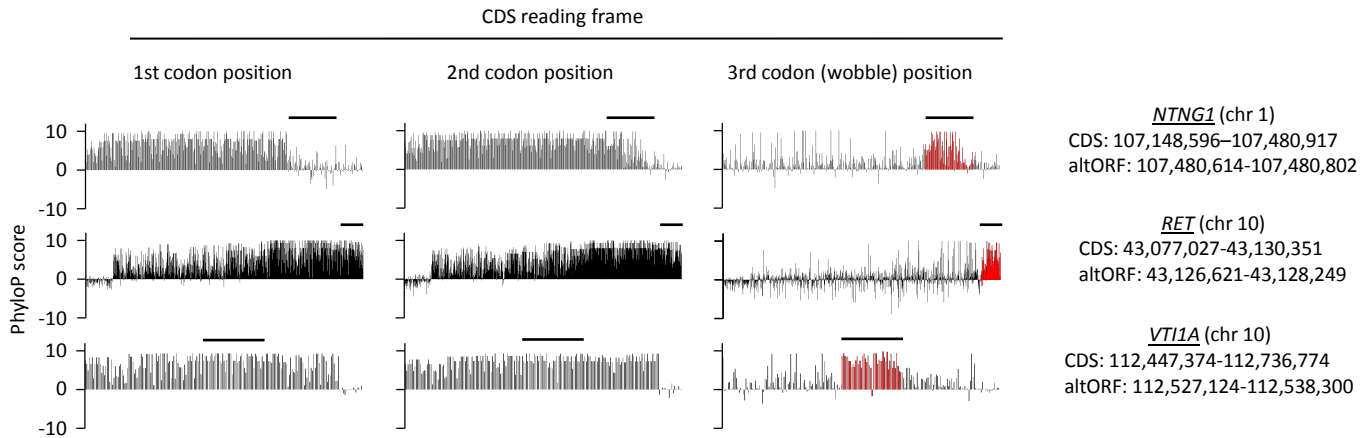

**Figure 5. First, second, and third codon nucleotide PhyloP scores for 100 vertebrate species for the CDSs of the *NTNG1*, *RET* and *VTG1A* genes.** Chromosomal coordinates for the different CDSs and altORFs are indicated on the right. The regions highlighted in red indicate the presence of an altORF characterized by a region with elevated PhyloP scores for wobble nucleotides. The region of the altORF is indicated by a black bar above each graph.

Figure 6

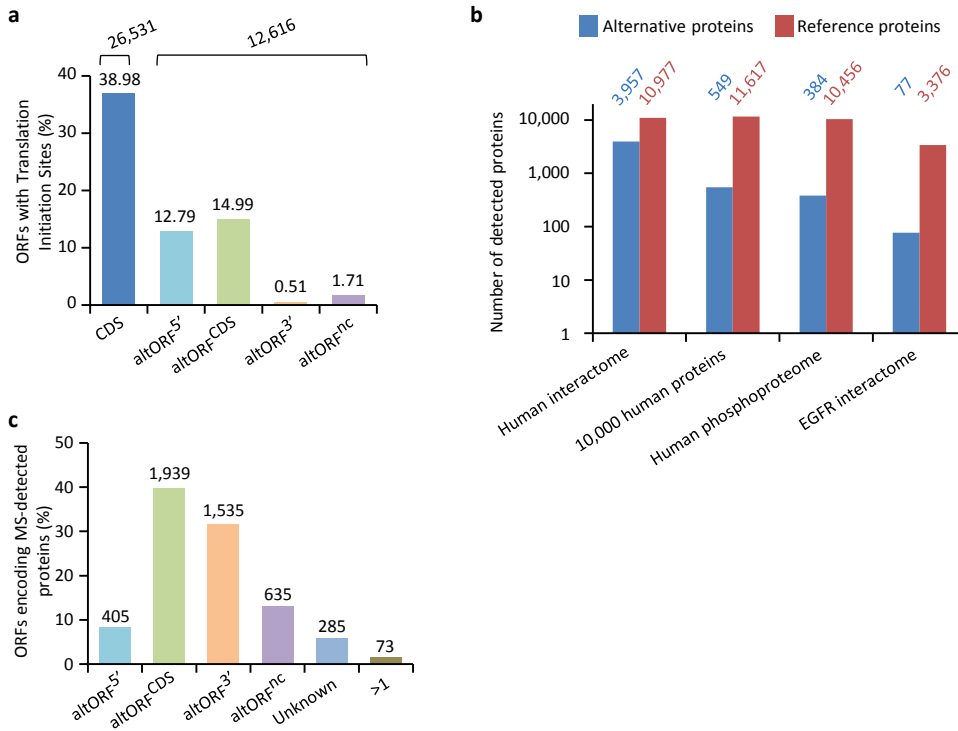

**Figure 6. Expression of human altORFs.**

(a) Percentage of CDSs and altORFs with detected TISs by ribosomal profiling and footprinting of human cells<sup>23</sup>. The total number of CDSs and altORFs with a detected TIS is indicated at the top. (b) Alternative and reference proteins detected in three large proteomic datasets: human interactome<sup>32</sup>, 10,000 human proteins<sup>35</sup>, human phosphoproteome<sup>34</sup>, EGFR interactome<sup>33</sup>. Numbers are indicated above each column. (c) Percentage of altORFs encoding alternative proteins detected by MS-based proteomics. The total number of altORFs is indicated at the top. Localization “Unknown” indicates that the detected peptides can match more than one alternative protein. Localization “>1” indicates that the altORF can have more than one localization in different RNA isoforms.

Figure 7

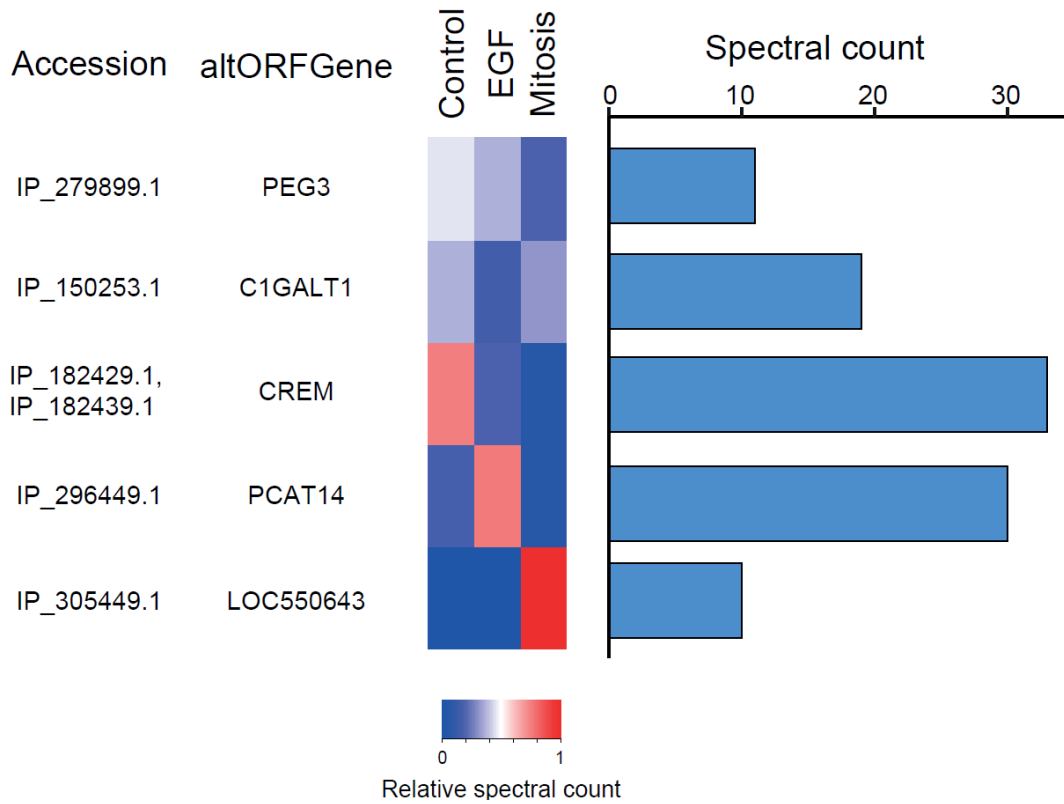

**Figure 7. The alternative phosphoproteome in mitosis and EGF-treated cells.** Heatmap showing relative levels of spectral counts for phosphorylated peptides following the indicated treatment<sup>34</sup>. For each condition, heatmap colors show the percentage of spectral count on total MS/MS phosphopeptide spectra. Blue bars on the right represent the number of MS/MS spectra; only proteins with spectral counts above 10 are shown.

a

AltLINC01420<sup>nc</sup>

MGDQPCASGRSTLPPGNAREAKPPKKRCLLAPRWDYEGTPNGGSTLPSAPPASAGLKSHPPPPEK

b

Spectrum & Fragment Ions (PR - NH2-WDY<p>PEGTPNGGSTLPSAPPASAGLK-COOH - SH 3+ 917.09 m/z)

□\_+?

NH2-W D Y P E G T P N G G S T T L P S A P P P A S A G L K-COOH

m/z = 917.09  
[M+3H]<sup>3+</sup> = 2751.27 Da

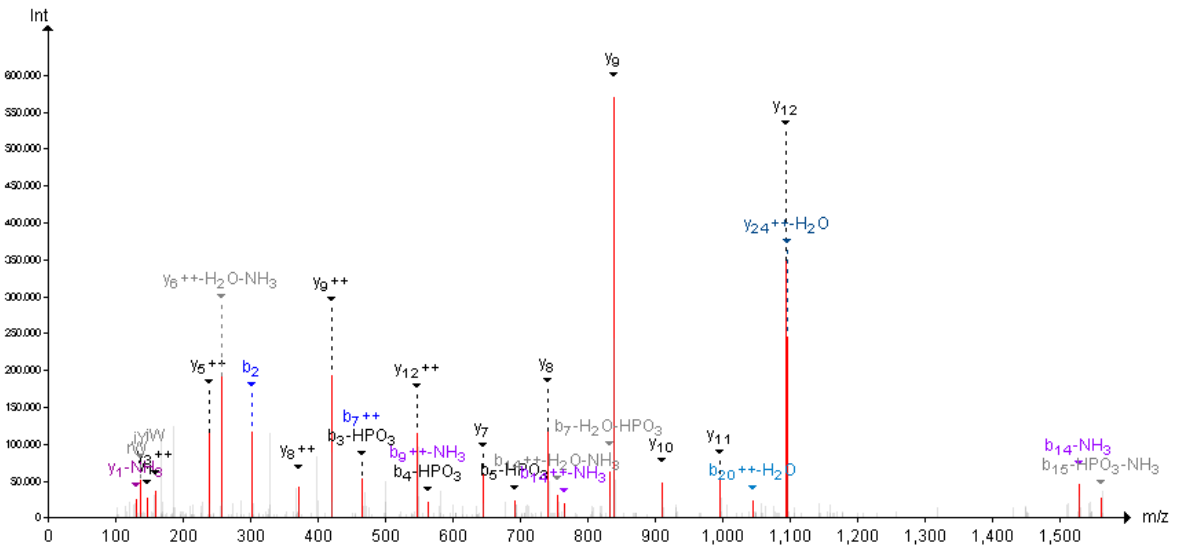

c

Spectrum & Fragment Ions (PR - NH2-WDYEGTPNGGSTLPSAPPASAGLK-COOH - SH 3+ 890.43 m/z)

□\_+?

NH2-W D Y P E G T P N G G S T T L P S A P P P A S A G L K-COOH

m/z = 890.43.09  
[M+3H]<sup>3+</sup> = 2671.29 Da

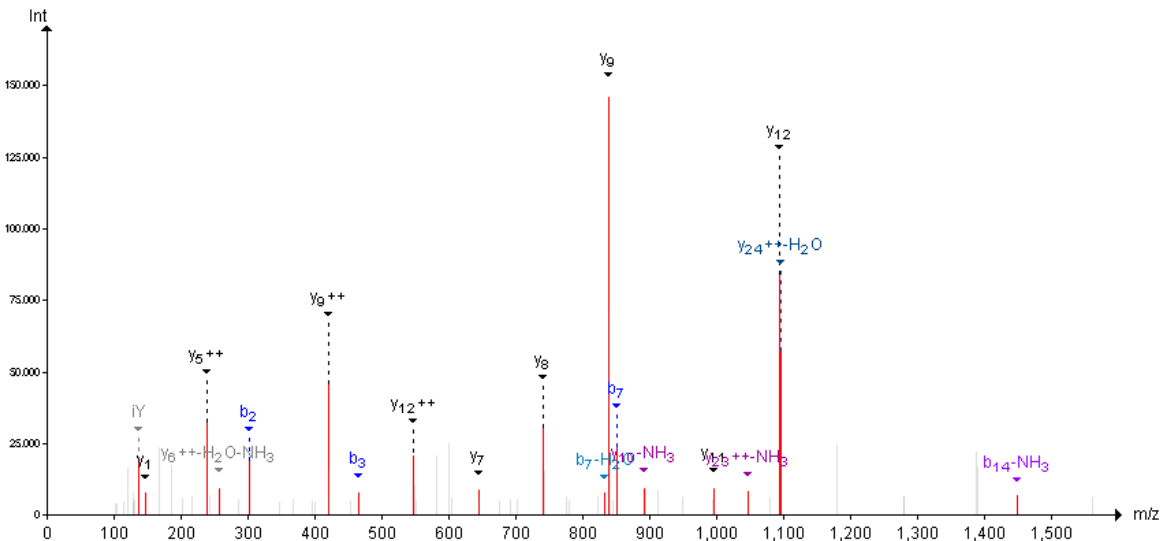



**Figure 7-figure supplement 1: Example of a phosphorylated peptide in mitosis - alternative protein AltLINC01420<sup>nc</sup> (LOC550643, IP\_305449.1).**

(a) AltLINC01420<sup>nc</sup> amino acid sequence with detected peptides underlined and phosphorylated peptide in bold (73,9% sequence coverage). (b) MS/MS spectrum for the phosphorylated peptide (PeptideShaker graphic interface output). The phosphorylation site is the tyrosine residue, position 2. (c) MS/MS spectrum for the non-phosphorylated peptide. The mass difference between the precursor ions between both spectra corresponds to that of a phosphorylation, confirming the specific phosphorylation of this residue in mitosis.

Figure 8

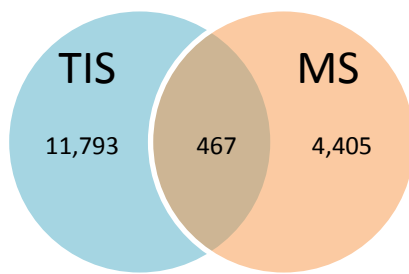

**Figure 8. Number of alternative proteins detected by ribosome profiling and mass spectrometry.**

The expression of 467 alternative proteins was detected by both ribosome profiling (translation initiation sites, TIS) and mass spectrometry (MS).

Figure 9

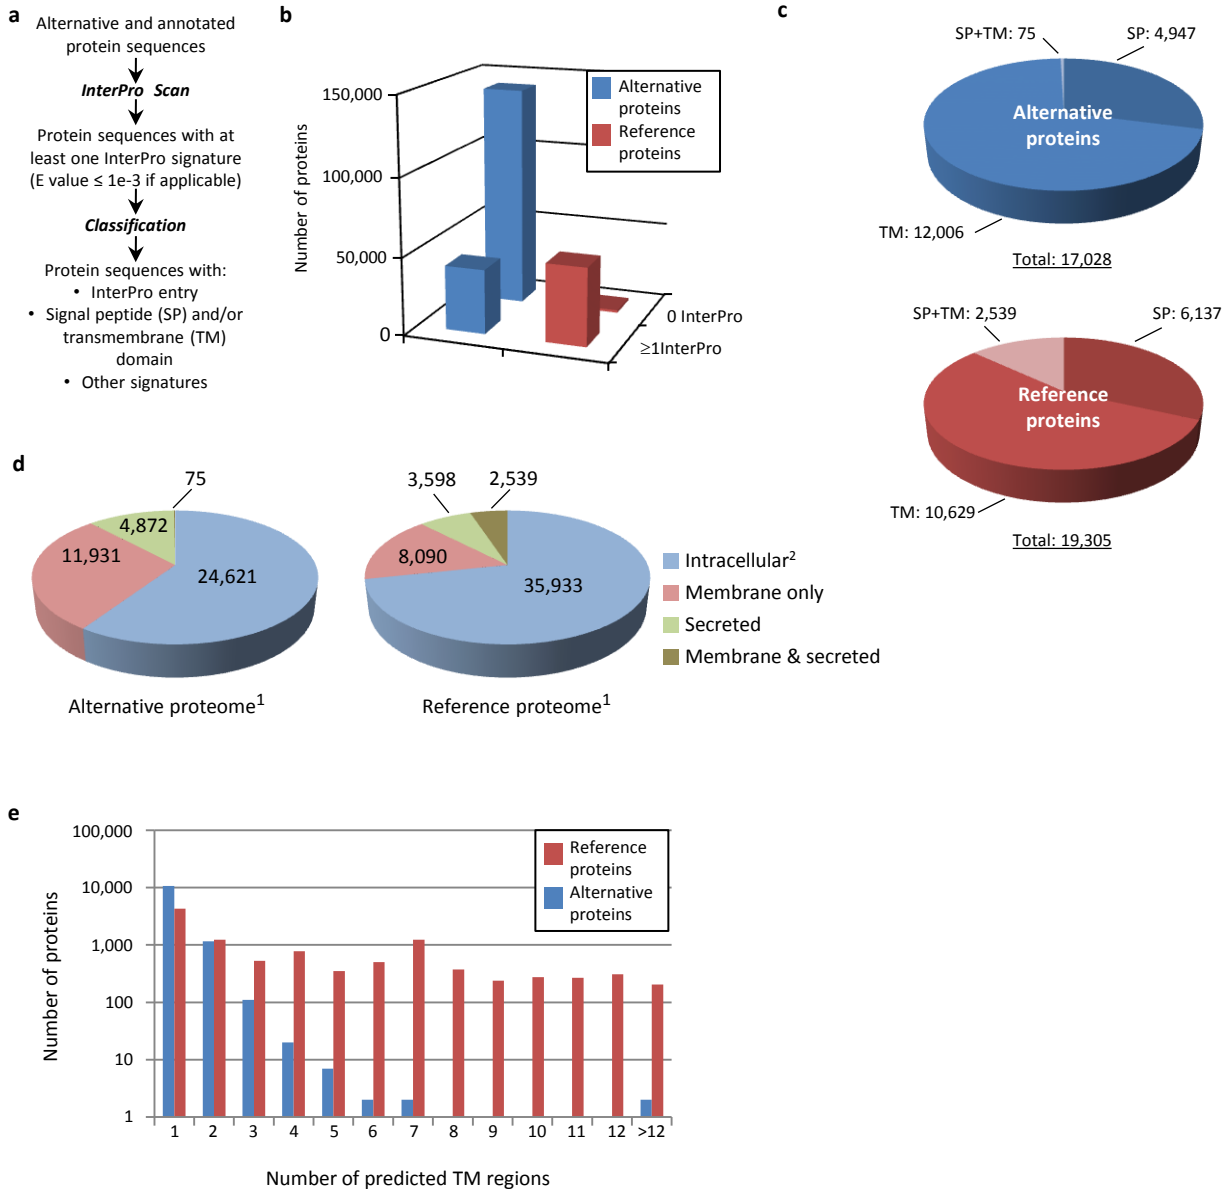

**Figure 9. Human alternative proteome sequence analysis and classification using InterProScan.**

(a) InterPro annotation pipeline. (b) Alternative and reference proteins with InterPro signatures. (c) Number of alternative and reference proteins with transmembrane domains (TM), signal peptides (S) and both TM and SP. (d) Number of all alternative and reference proteins predicted to be intracellular, membrane, secreted and membrane-spanning and secreted. <sup>1</sup>Proteins with at least one InterPro signature; <sup>2</sup>Proteins with no predicted signal peptide or transmembrane features. (e) Number of predicted TM regions for alternative and reference proteins.

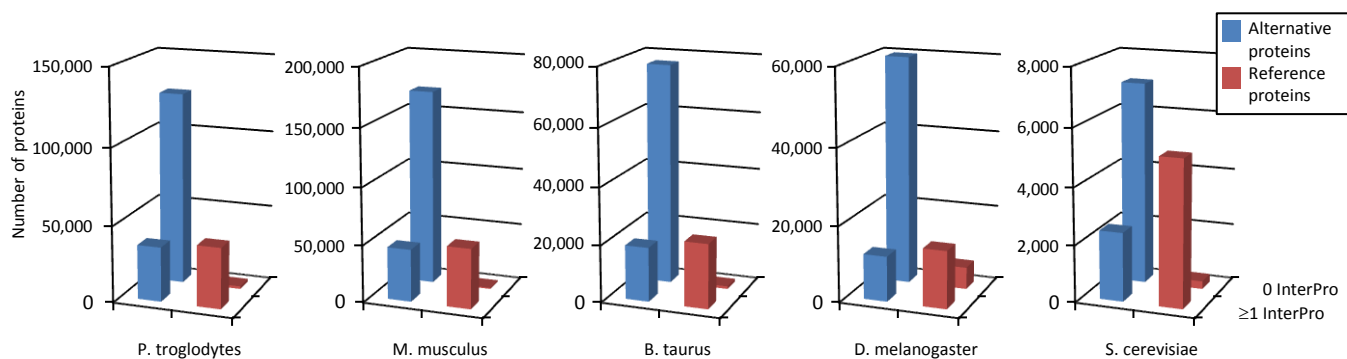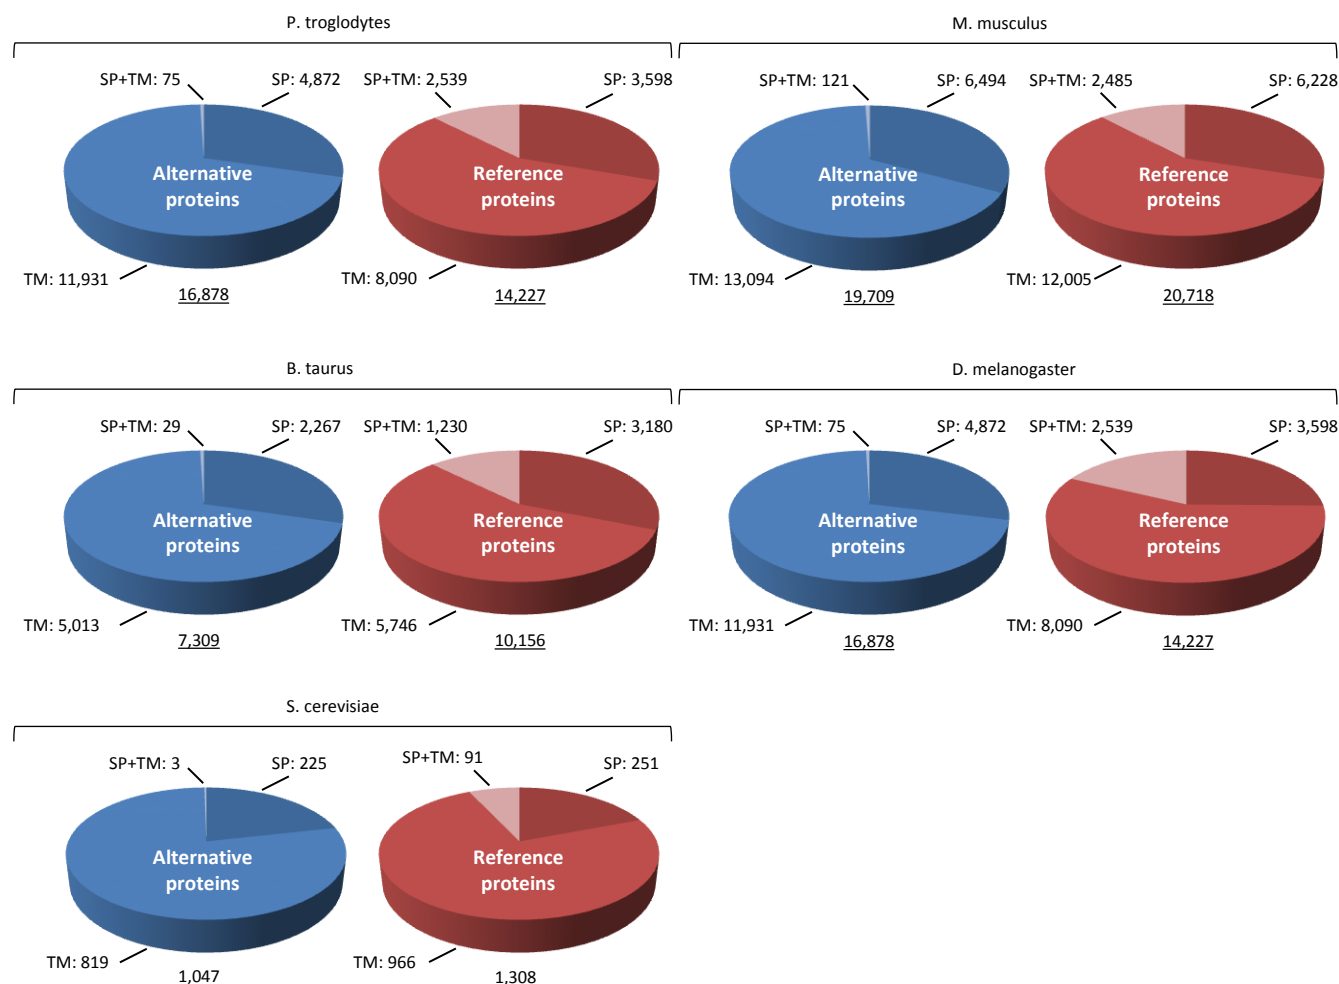

**Figure 9-figure supplement 1: Alternative proteome sequence analysis and classification in *P. troglodytes*, *M. musculus*, *B. Taurus*, *D. melanogaster* and *S. cerevisiae*.**

For each organism, the number of InterPro signatures (top graphs) and proteins with transmembrane (TM), signal peptide (SP), or TM+SP features (bottom pie charts) is indicated for alternative and reference proteins.

Figure 10

**a** Cellular components

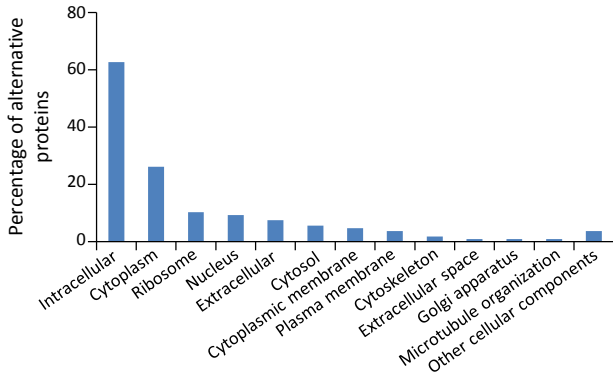

**b** Biological process

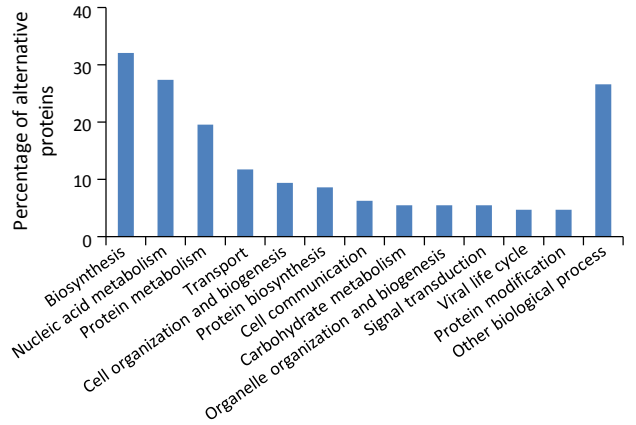

**c** Molecular functions

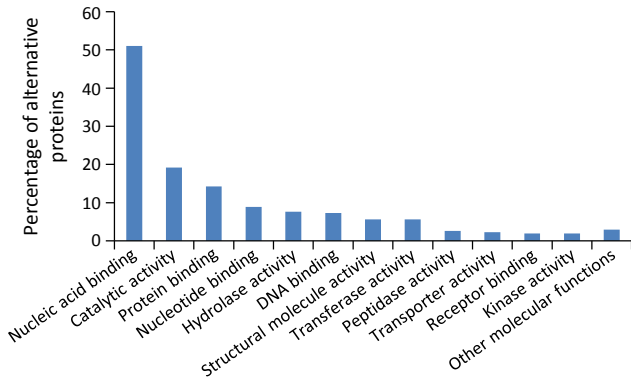

**Figure 10. Gene ontology (GO) annotations for human alternative proteins.**

GO terms assigned to InterPro entries are grouped into 13 categories for each of the three ontologies. **(a)** 34 GO terms were categorized into cellular component for 107 alternative proteins. **(b)** 64 GO terms were categorized into biological process for 128 alternative proteins. **(c)** 94 GO terms were categorized into molecular function for 302 alternative proteins. The majority of alternative proteins with GO terms are predicted to be intracellular, to function in nucleic acid-binding, catalytic activity and protein binding and to be involved in biosynthesis and nucleic acid metabolism processes.

Figure 11

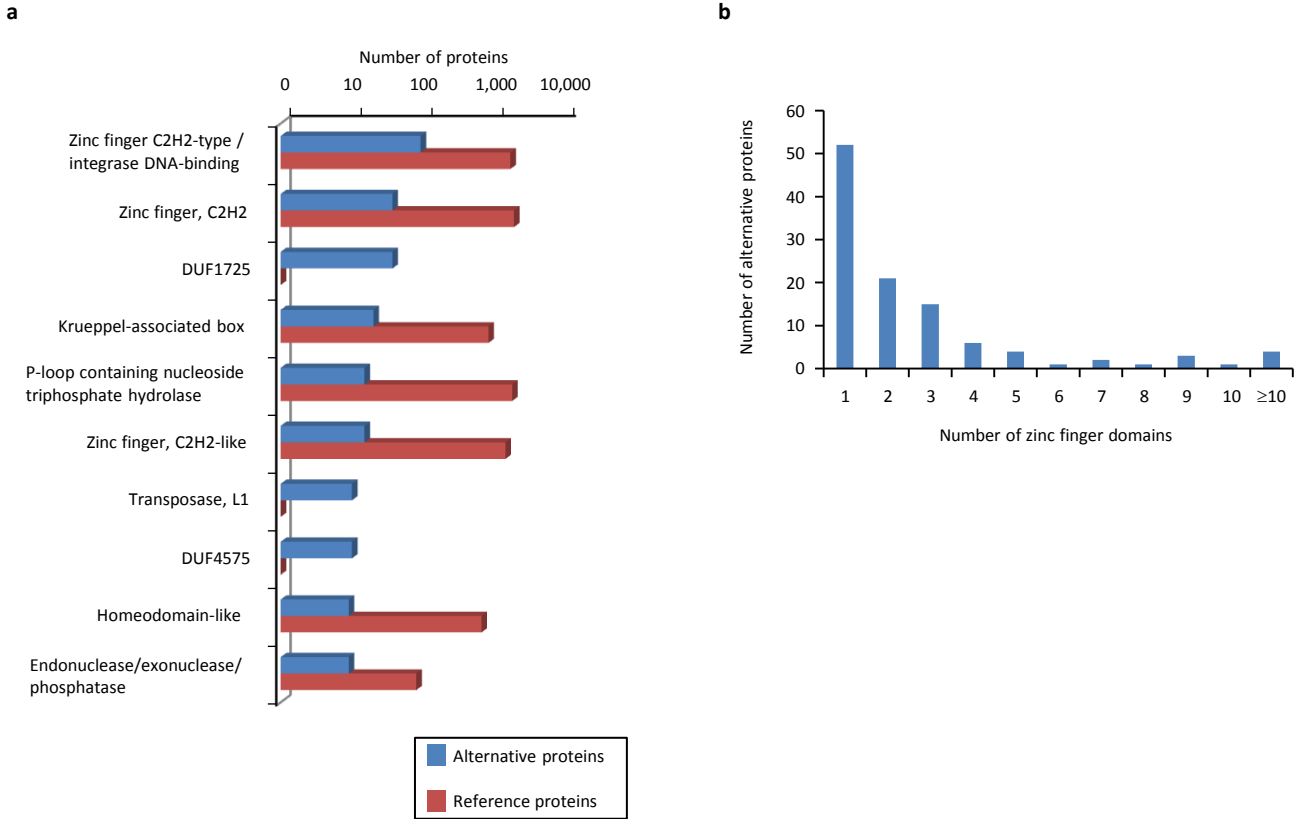

**Figure 11. Main InterPro entries in human alternative proteins. (a)** The top 10 InterPro families in the human alternative proteome. **(b)** A total of 110 alternative proteins have between 1 and 23 zinc finger domains.

Figure 12

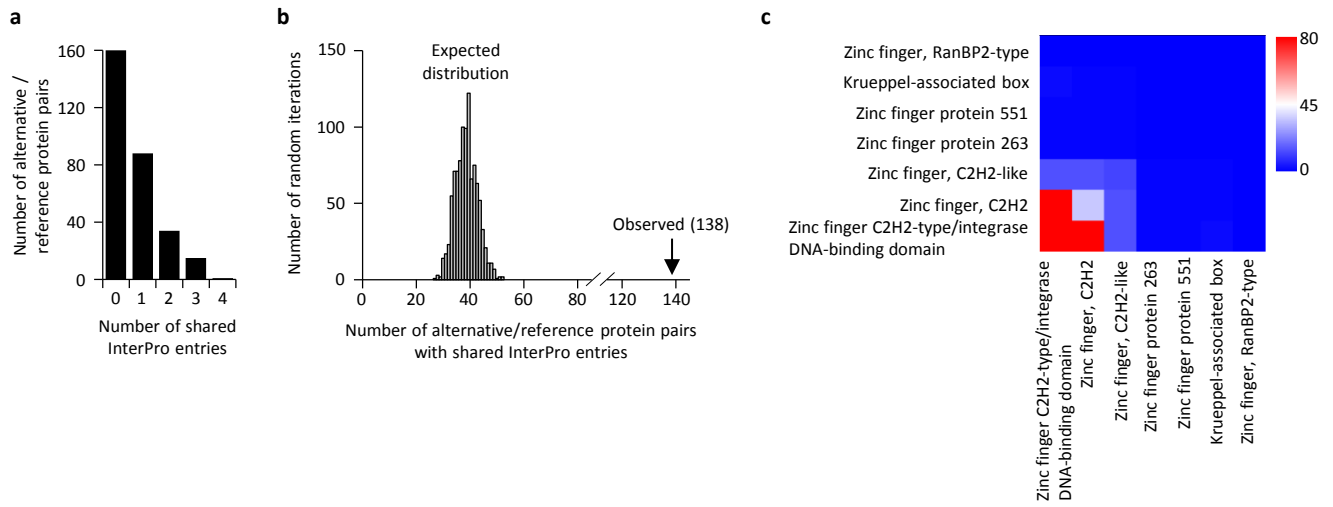

**Figure 12. Reference and alternative proteins share functional domains.**

(a) Distribution of the number of shared InterPro entries between alternative and reference proteins coded by the same transcripts. 138 pairs of alternative and reference proteins share between 1 and 4 protein domains (InterPro entries). Only alternative/reference protein pairs that have at least one domain are considered ( $n = 298$ ). (b) The number of reference/alternative protein pairs that share domains ( $n = 138$ ) is higher than expected by chance alone. The distribution of expected pairs sharing domains and the observed number are shown. (c) Matrix of co-occurrence of domains related to zinc fingers. The entries correspond to the number of times entries co-occur in reference and alternative proteins. The full matrix is available in figure 12-figure supplement 1.

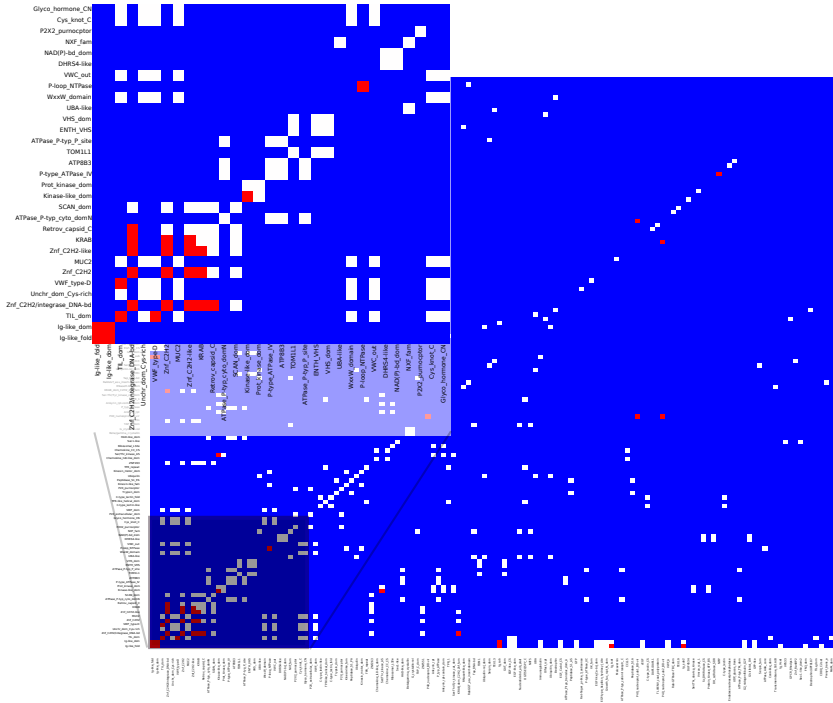



**Figure 12-figure supplement 1: Matrix of co-occurrence of InterPro entries between alternative/reference protein pairs coded by the same transcript.**

Pixels show the number of times entries co-occur in reference and alternative proteins. Blue pixels indicate that these domains are not shared, white pixels indicate that they are shared once, and red that they are shared twice or more.

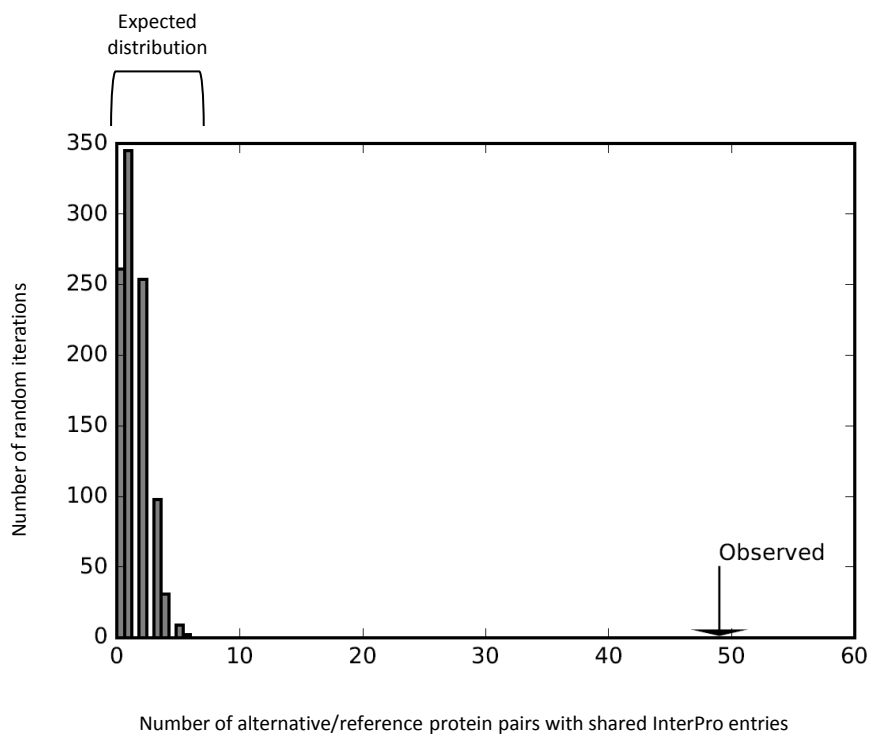

**Figure 12-figure supplement 2: Reference and alternative proteins share functional domains.**

The number of reference/alternative protein pairs that share domains ( $n = 49$ ) is higher than expected by chance alone ( $p < 0.001$ ). The distribution of expected pairs sharing domains and the observed number are shown. This is the same analysis as the one presented in figure 12b, with the zinc finger domains taken out.

## Figure 13

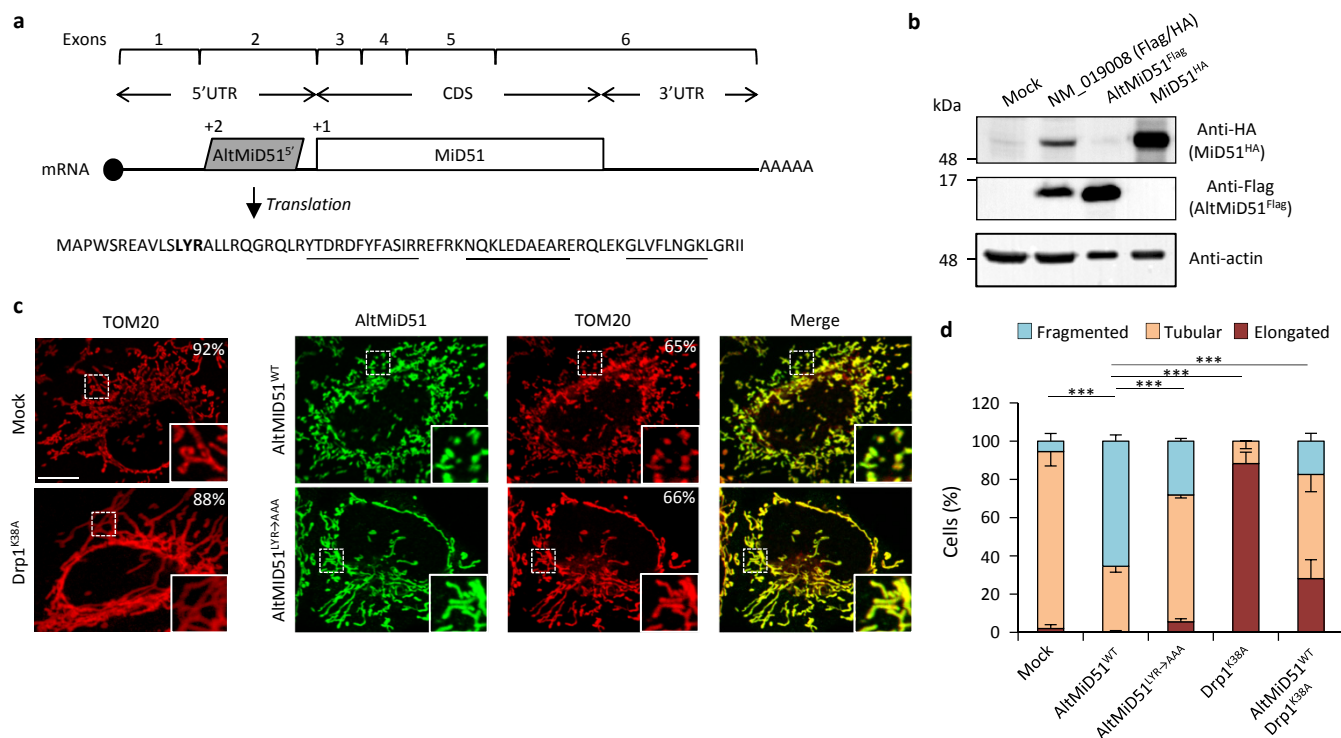

### Figure 13. AltMiD51<sup>5'</sup> expression induces mitochondrial fission.

(a) AltMiD51<sup>5'</sup> coding sequence is located in exon 2 of the *MiD51/MIEF1/SMCR7L* gene and in the 5'UTR of the canonical mRNA (RefSeq NM\_019008). +2 and +1 indicate reading frames. AltMiD51 amino acid sequence is shown with the LYR tripeptide shown in bold. Underlined peptides were detected by MS. (b) Human HeLa cells transfected with empty vector (mock), a cDNA corresponding to the canonical MiD51 transcript with a Flag tag in frame with altMiD51 and an HA tag in frame with MiD51, altMiD51<sup>Flag</sup> cDNA or MiD51<sup>HA</sup> cDNA were lysed and analyzed by western blot with antibodies against Flag, HA or actin, as indicated. (c) Confocal microscopy of mock-transfected cells, cells transfected with altMiD51<sup>WT</sup>, altMiD51<sup>LYR→AAA</sup> or Drp1<sup>K38A</sup> immunostained with anti-TOM20 (red channel) and anti-Flag (green channel) monoclonal antibodies. In each image, boxed areas are shown at higher magnification in the bottom right corner. % of cells with the most frequent morphology is indicated: mock (tubular), altMiD51<sup>WT</sup> (fragmented), altMiD51<sup>LYR→AAA</sup> (tubular), Drp1(K38A) (elongated). Scale bar, 10  $\mu$ m. (d) Bar graphs show mitochondrial morphologies in HeLa cells. Means of three independent experiments per condition are shown (100 cells for each independent experiment). \*\*\* $p$ <0.0005 (Fisher's exact test) for the three morphologies between altMiD51(WT) and the other experimental conditions.

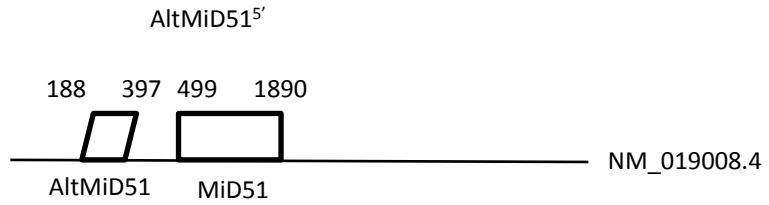

**a. Experimental peptide**

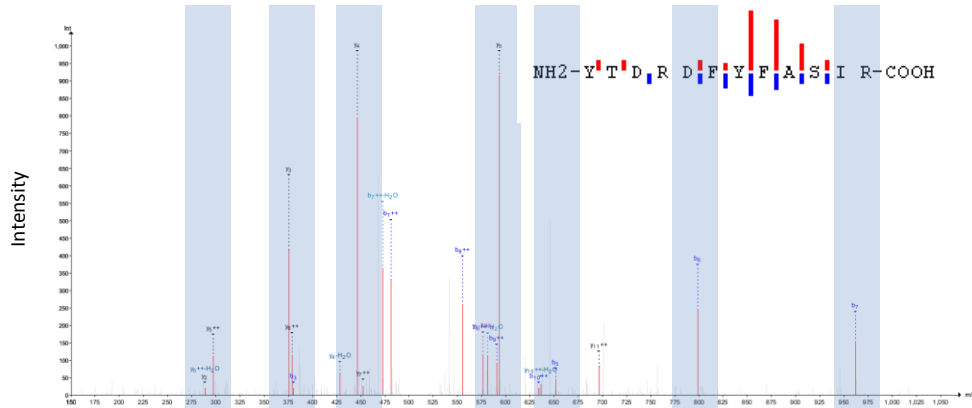

**b. Synthetic peptide**

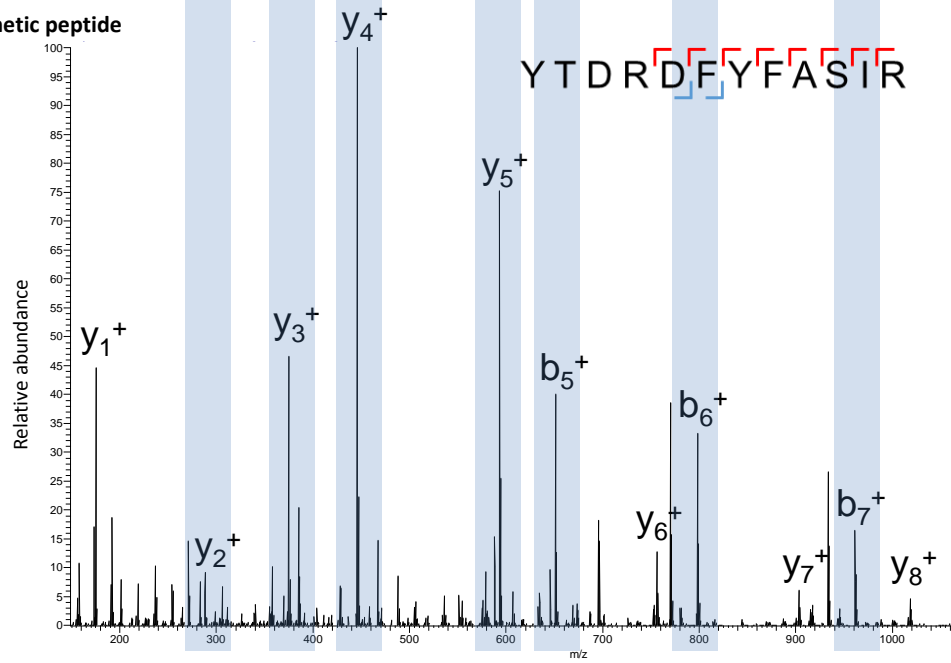

### c. Experimental peptide

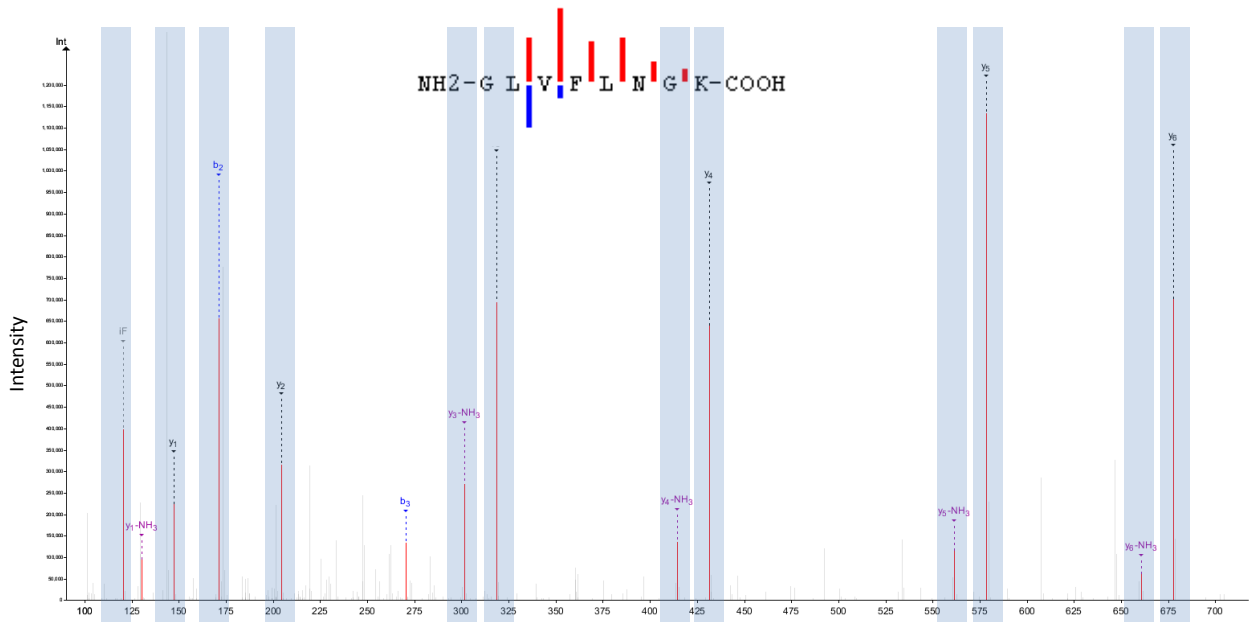

### d. Synthetic peptide

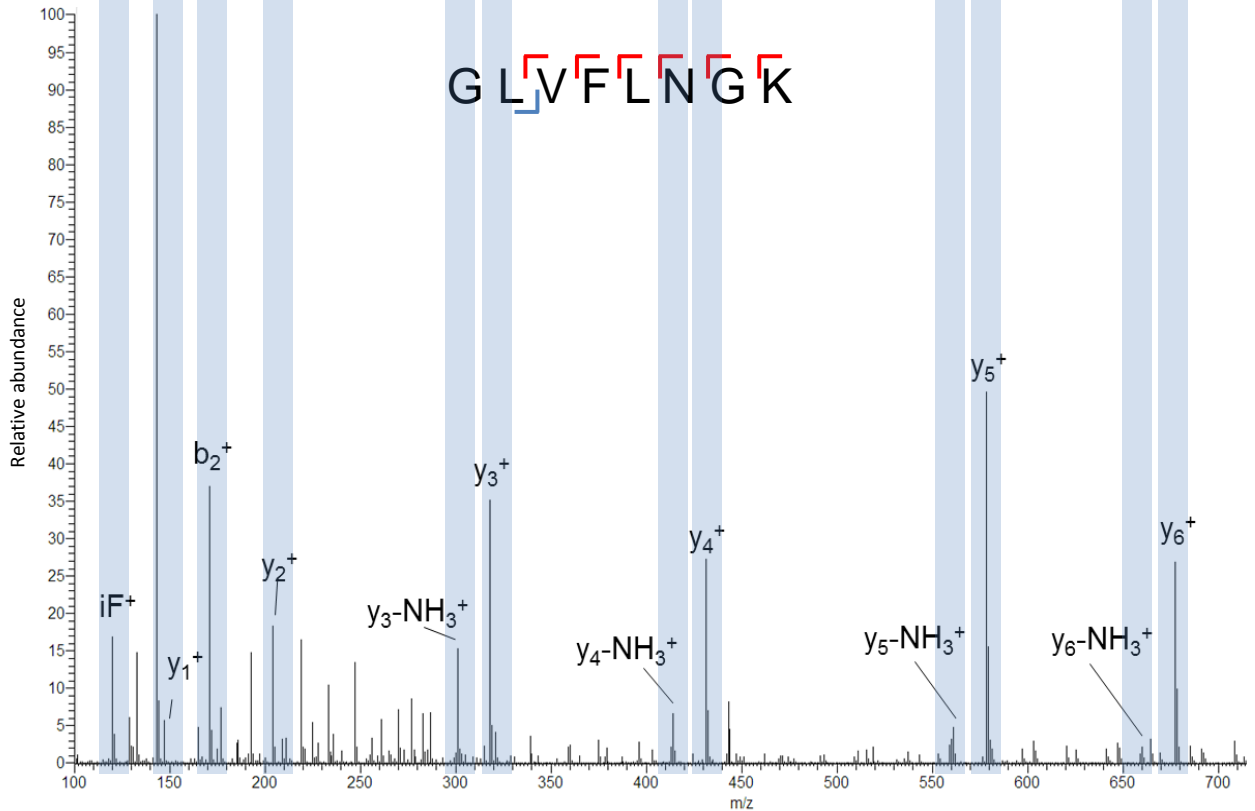

### Figure 13-figure supplement 1: Spectra validation for altMiD51.

Example of validation for altMiD51 specific peptides YTDRDFYFASIR and GLVFLNGK. (a,c) Experimental MS/MS spectra (PeptideShaker graphic interface output). (b,d) MS/MS spectra of the synthetic peptides.

Matching peaks are shown with blue masks. A diagram of the transcript with its accession number and the localization of the altORF and the CDS is shown at the top.

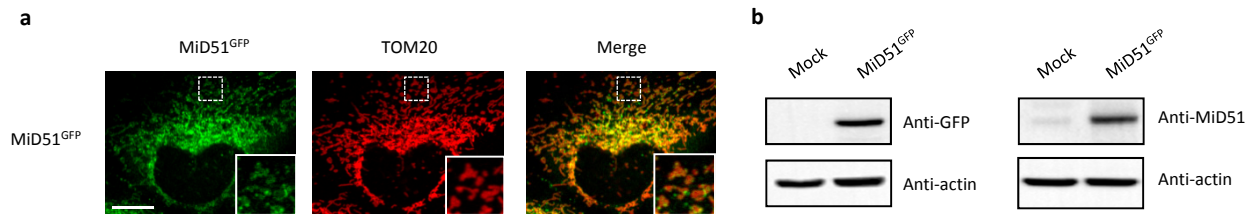

**Figure 13-figure supplement 2: MiD51 expression results in mitochondrial fission.**

(a) Confocal microscopy of HeLa cells transfected with MiD51<sup>GFP</sup> immunostained with anti-TOM20 (red channel) monoclonal antibodies. In each image, boxed areas are shown at higher magnification in the bottom right corner. The localization of MiD51 in fission sites is shown in merged higher magnification inset. Scale bar, 10 μm. (b) Human HeLa cells transfected with empty vector (mock) or MiD51<sup>GFP</sup> were lysed and analyzed by western blot to confirm MiD51<sup>GFP</sup> expression.

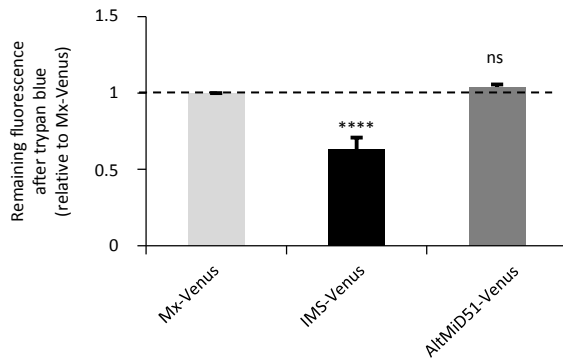

**Figure 13-figure supplement 3: AltMiD51 is localized in the mitochondrial matrix.**

Trypan blue quenching experiment performed on HeLa cells stably expressing the indicated constructs. The fluorescence remaining after quenching by trypan blue is shown relative to Matrix-Venus (Mx-Venus) indicated by the dashed line. (\*\*\*\*  $p < 0,0001$ , one-way ANOVA). The absence of quenching of the fluorescence compared to IMS-Venus indicates the matricial localization of altMiD51.  $n \geq 3$  cells were quantified per experiment, and results are from 6 independent experiments. Data are mean  $\pm$ SEM.

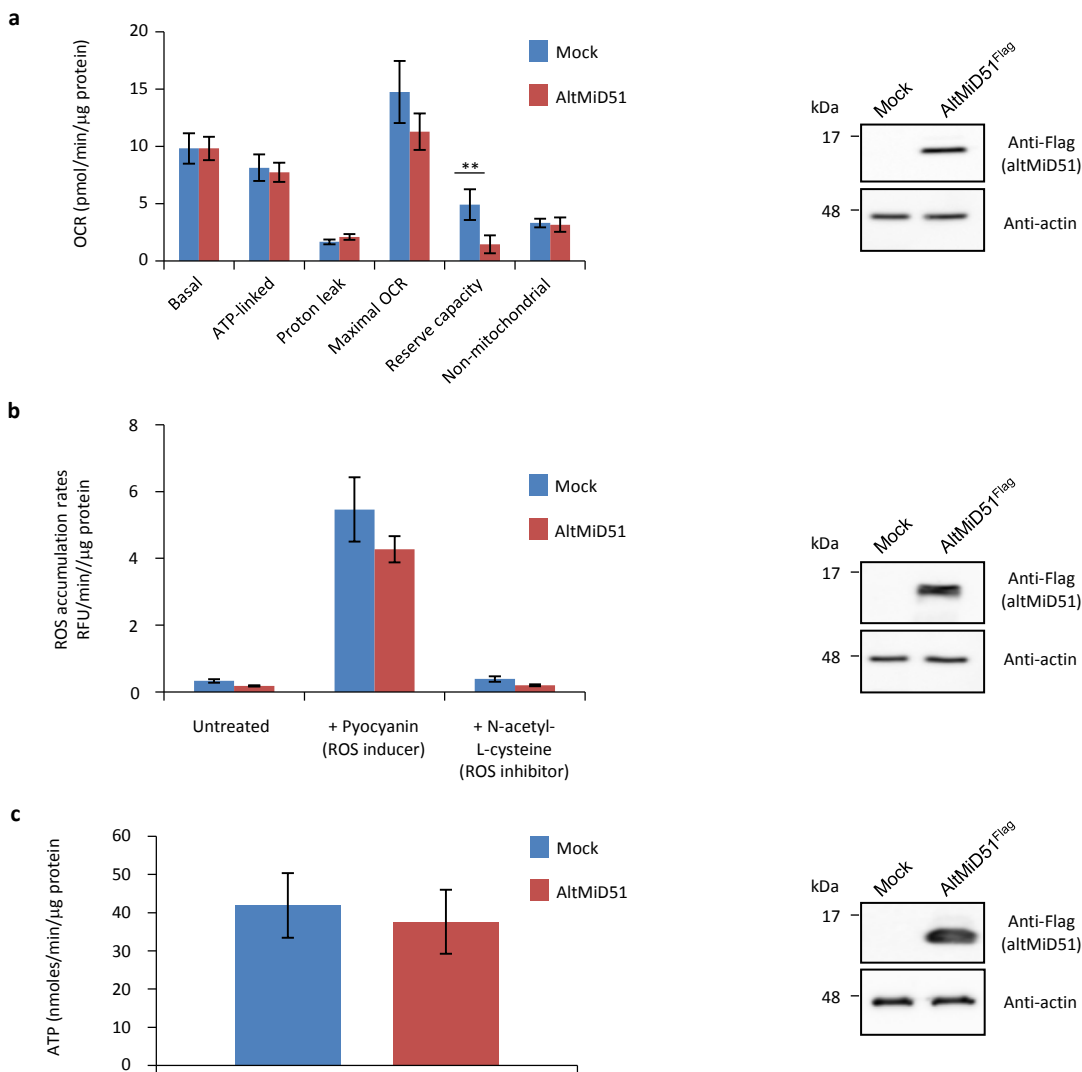

**Figure 13-figure supplement 4: Mitochondrial function parameters.**

(a) Oxygen consumption rates (OCR) in HeLa cells transfected with empty vector (mock) or altMiD51<sup>Flag</sup>. Mitochondrial function parameters were assessed in basal conditions (basal), in the presence of oligomycin to inhibit the ATP synthase (oxygen consumption that is ATP-linked), FCCP to uncouple the mitochondrial inner membrane and allow for maximum electron flux through the respiratory chain (maximal OCR), and antimycin A/rotenone to inhibit complex III (non-mitochondrial). The balance of the basal OCR comprises oxygen consumption due to proton leak and nonmitochondrial sources. The mitochondrial reserve capacity (maximal OCR- basal OCR) is an indicator of rapid adaptation to stress and metabolic changes. Mean values of replicates are plotted with error bars corresponding to the 95% confidence intervals. Statistical significance was estimated using a two-way ANOVA with Tukey's post-hoc test (\*\* $p = 0,004$ ). (b) ROS production in mock and altMiD51-expressing cells. Cells were untreated, treated with a ROS inducer or a ROS inhibitor. Results represent the mean value out of three independent experiments, with error bars corresponding to the standard error of the mean (s.e.m.). Statistical significance was estimated using unpaired T-test. (c) ATP synthesis rate in mock and altMiD51-expressing cells. No significant differences in ATP production were observed between mock and altMiD51 transfected cells.

Results represent the mean of three independent experiments (8 technical replicates each). Error bars represent the standard error of the mean. At the end of the experiments, cells were collected and proteins analyzed by western blot with antibodies against the Flag tag (altMiD51) or actin, as indicated, to verify the expression of altMiD51. A representative western blot is shown on the right. Molecular weight markers are shown on the left (kDa).



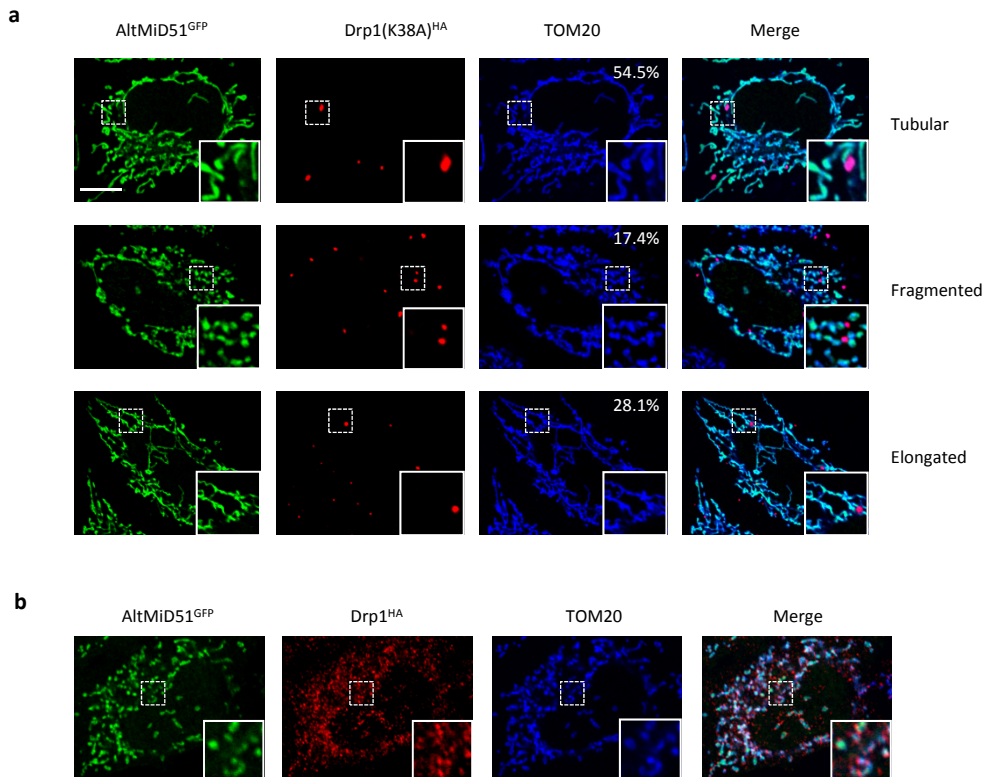

**Figure 13-figure supplement 5: Representative confocal images of cells co-expressing altMiD51<sup>GFP</sup> and Drp1(K38A)<sup>HA</sup>.**

(a) Confocal microscopy of HeLa cells co-transfected with altMiD51<sup>GFP</sup> and Drp1(K38A)<sup>HA</sup> immunostained with anti-TOM20 (blue channel) and anti-HA (red channel) monoclonal antibodies. In each image, boxed areas are shown at higher magnification in the bottom right corner. % of cells with the indicated morphology is indicated on the TOM20 panels. (b) Confocal microscopy of HeLa cells co-transfected with altMiD51<sup>GFP</sup> and Drp1(wt)<sup>HA</sup> immunostained with anti-TOM20 (blue channel) and anti-HA (red channel) monoclonal antibodies. In each image, boxed areas are shown at higher magnification in the bottom right corner. Scale bar, 10  $\mu$ m.

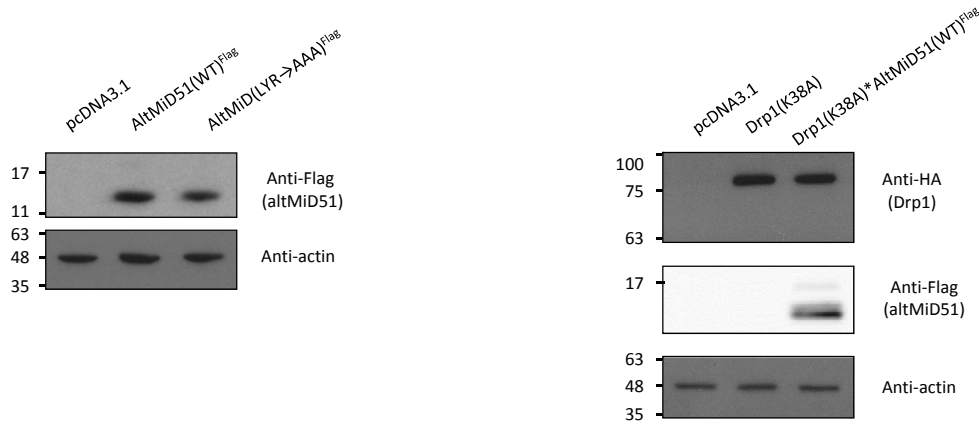

**Figure 13-figure supplement 6: Protein immunoblot showing the expression of different constructs in HeLa cells.**

HeLa cells were transfected with empty vector (pcDNA3.1), altMiD51(WT)<sup>Flag</sup>, altMiD51(LYR→AAA)<sup>Flag</sup>, Drp1(K38A)<sup>HA</sup>, or Drp1(K38A)<sup>HA</sup> and altMiD51(WT)<sup>Flag</sup>, as indicated. Proteins were extracted and analyzed by western blot with antibodies against the Flag tag (altMiD51), the HA tag (Drp1K38A) or actin, as indicated. Molecular weight markers are shown on the left (kDa). Representative experiment of three independent biological replicates.

## Figure 14

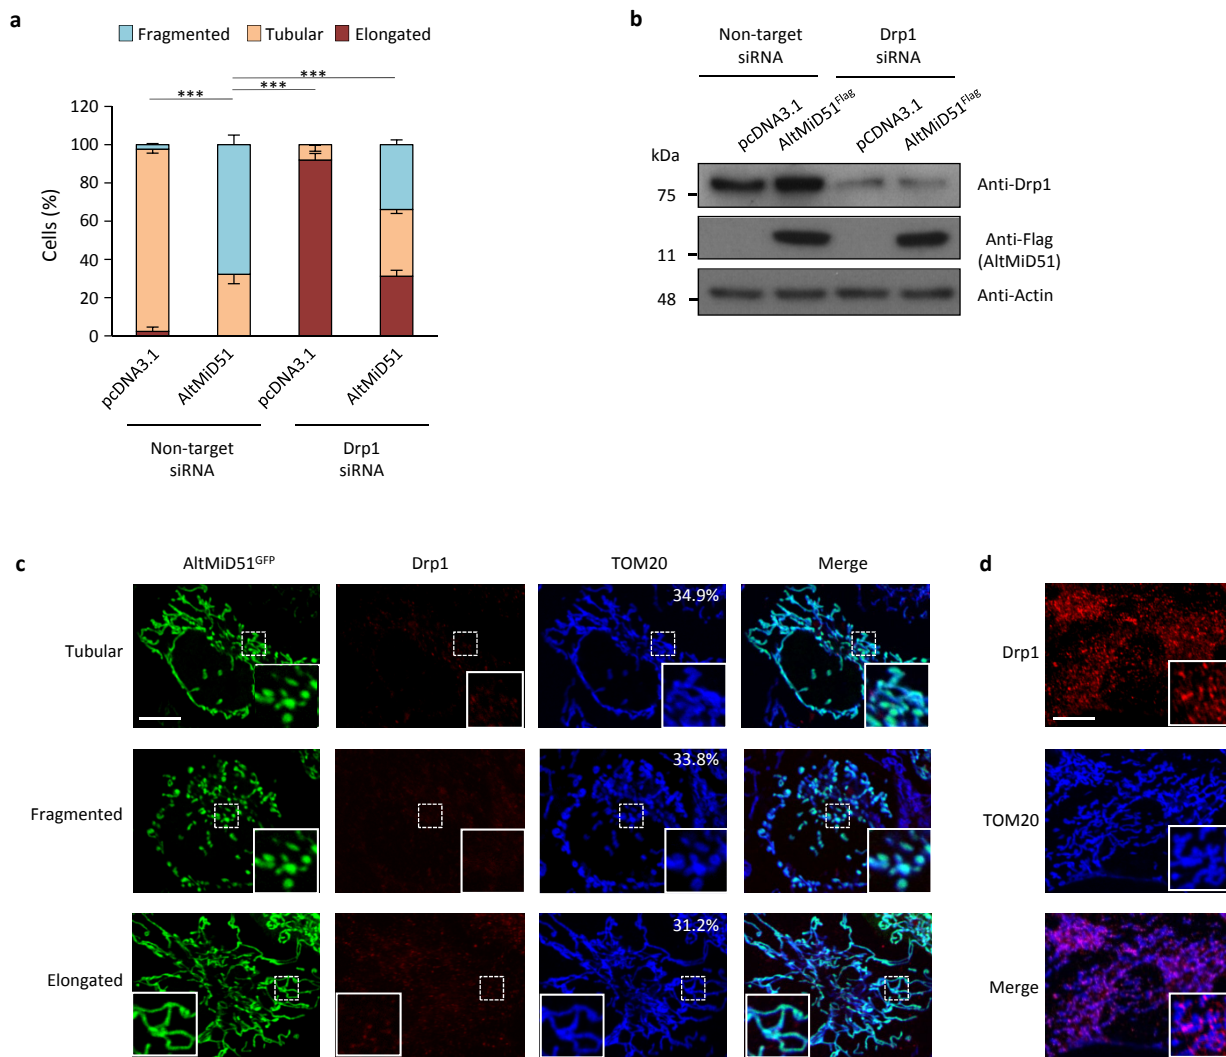

### Figure 14. AltMiD51-induced mitochondrial fragmentation is dependent on Drp1.

(a) Bar graphs show mitochondrial morphologies in HeLa cells treated with non-target or Drp1 siRNAs. Cells were mock-transfected (pcDNA3.1) or transfected with altMiD51<sup>Flag</sup>. Means of three independent experiments per condition are shown (100 cells for each independent experiment). \*\*\* $p < 0.0005$  (Fisher's exact test) for the three morphologies between altMiD51 and the other experimental conditions. (b) HeLa cells treated with non-target or Drp1 siRNA were transfected with empty vector (pcDNA3.1) or altMiD51<sup>Flag</sup>, as indicated. Proteins were extracted and analyzed by western blot with antibodies against the Flag tag (altMiD51), Drp1 or actin, as indicated. (c) Confocal microscopy of Drp1 knockdown cells transfected with altMiD51<sup>GFP</sup> immunostained with anti-TOM20 (blue channel) and anti-Drp1 (red channel) monoclonal antibodies. In each image, boxed areas are shown at higher magnification in the bottom right corner. % of cells with the indicated morphology is indicated on the TOM20 panels. Scale bar, 10  $\mu\text{m}$ . (d) Control Drp1 immunostaining in HeLa cells treated with a non-target siRNA. For (c) and (d), laser parameters for Drp1 and TOM20 immunostaining were identical.

## Figure 15

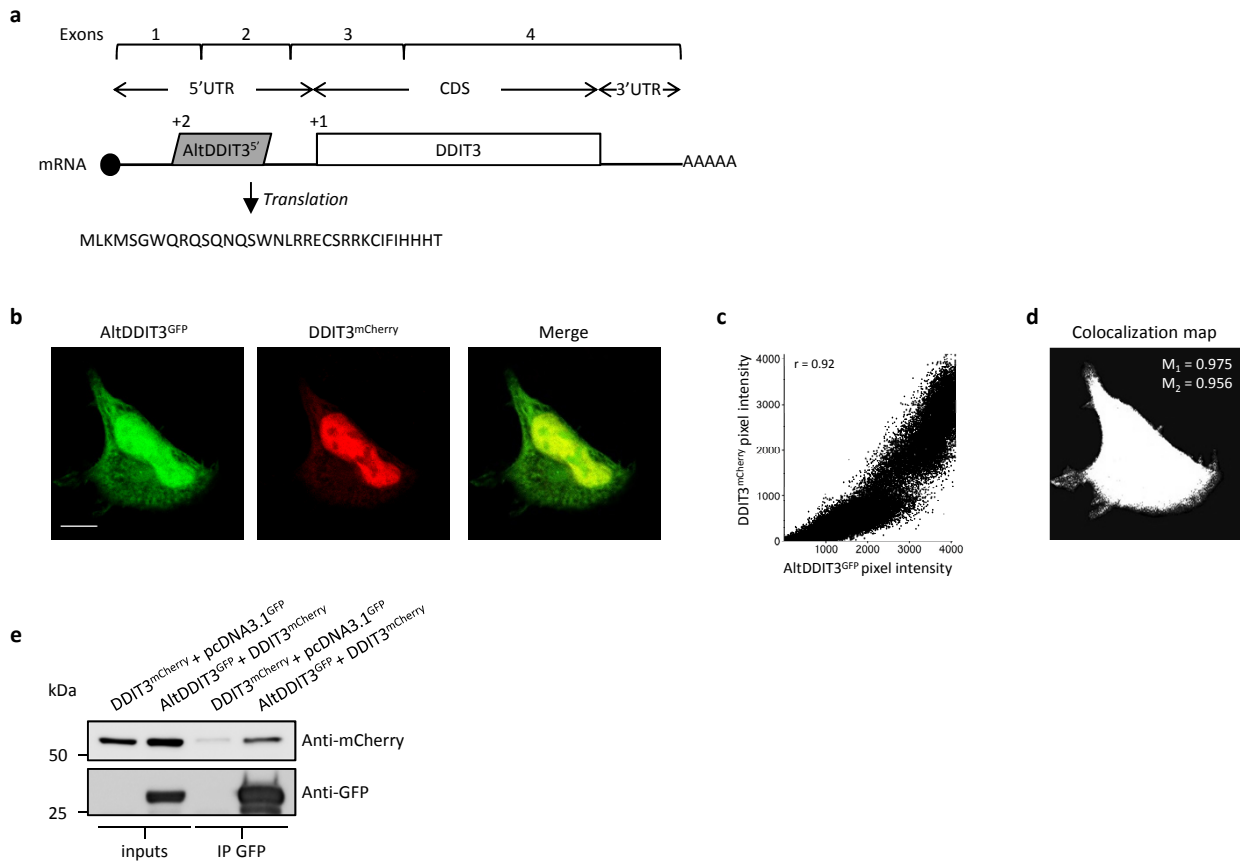

### Figure 15. AltDDIT3<sup>5'</sup> co-localizes and interacts with DDIT3.

(a) AltDDIT3<sup>5'</sup> coding sequence is located in exons 1 and 2 of the *DDIT3/CHOP/GADD153* gene and in the 5'UTR of the canonical mRNA (RefSeq NM\_004083.5). +2 and +1 indicate reading frames. AltDDIT3 amino acid sequence is also shown. (b) Confocal microscopy analyses of HeLa cells co-transfected with altDDIT3<sup>GFP</sup> (green channel) and DDIT3<sup>mCherry</sup> (red channel). Scale bar, 10 μm. (c, d) Colocalization analysis of the images shown in (b) performed using the JACoP plugin (Just Another Co-localization Plugin) implemented in Image J software (two independent biological replicates). (c) Scatterplot representing 50 % of green and red pixel intensities showing that altDDIT3<sup>GFP</sup> and DDIT3<sup>mCherry</sup> signal highly correlate (with Pearson correlation coefficient of 0.92 ( $p$ -value < 0.0001)). (d) Binary version of the image shown in (b) after Costes' automatic threshold. White pixels represent colocalization events ( $p$ -value < 0.001, based on 1000 rounds of Costes' randomization colocalization analysis). The associated Manders Correlation Coefficient,  $M_1$  and  $M_2$ , are shown in the right upper corner.  $M_1$  is the proportion of altDDIT3<sup>GFP</sup> signal overlapping DDIT3<sup>mCherry</sup> signal and  $M_2$  is the proportion of DDIT3<sup>mCherry</sup> signal overlapping altDDIT3<sup>GFP</sup>. (e) Representative immunoblot of co-immunoprecipitation with GFP-Trap agarose beads performed on HeLa lysates co-expressing DDIT3<sup>mCherry</sup> and altDDIT3<sup>GFP</sup> or DDIT3<sup>mCherry</sup> with pcDNA3.1<sup>GFP</sup> empty vector (two independent experiments).

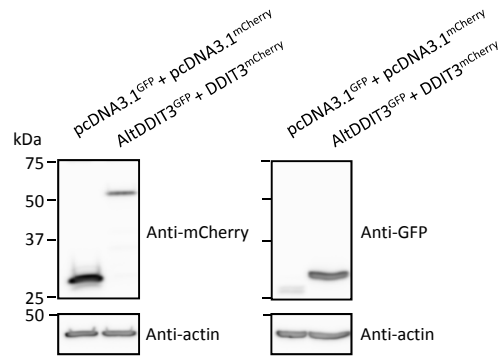

**Figure 15-figure supplement 1: Protein immunoblot showing the expression of different constructs in HeLa cells.**

HeLa cells were co-transfected with GFP and mCherry, or altDDIT3<sup>GFP</sup> and DDIT3<sup>mCherry</sup>, as indicated. Proteins were extracted and analyzed by western blot with antibodies, as indicated. Molecular weight markers are shown on the left (kDa). AltDDIT3 has a predicted molecular weight of 4.28 kDa and thus migrates at its expected molecular weight when tagged with GFP (~32 kDa). Representative experiment of two independent biological replicates.

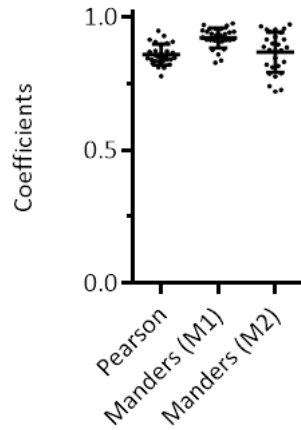

**Figure 15–figure supplement 2 : Colocalization of altDDIT3 with DDIT3.**

Scatter plots of Pearson's Correlation Coefficient and Manders' Correlation Coefficient after Costes' automatic threshold ( $p$ -value < 0.001, based on 1000 rounds of Costes' randomization colocalization analysis). M1 is the proportion of altDDIT3<sup>GFP</sup> signal overlapping DDIT3<sup>mCherry</sup> signal and M2 is the proportion of DDIT3<sup>mCherry</sup> signal overlapping altDDIT3<sup>GFP</sup>. Error bars represent the mean +/- SD of three independent experiments (28 cells).
